# Supplementary material for: Impact of a Powdered Meal Replacement on Metabolism and Gut Microbiota (PREMIUM) in individuals with excessive body weight: a study protocol for a randomised controlled trial
Source: PubMed Central journal article supplement — BMJ Open. 2023 Sep 13;13(9):e070027. doi: 10.1136/bmjopen-2022-070027 (PMC11148686; doi:10.1136/bmjopen-2022-070027), 2023-09-13
Supplement: bmjopen-2022-070027.draft_revisions.pdf [file bmjopen-2022-070027.draft_revisions.pdf]

# BMJ Open

BMJ Open is committed to open peer review. As part of this commitment we make the peer review history of every article we publish publicly available.

When an article is published we post the peer reviewers' comments and the authors' responses online. We also post the versions of the paper that were used during peer review. These are the versions that the peer review comments apply to.

The versions of the paper that follow are the versions that were submitted during the peer review process. They are not the versions of record or the final published versions. They should not be cited or distributed as the published version of this manuscript.

BMJ Open is an open access journal and the full, final, typeset and author-corrected version of record of the manuscript is available on our site with no access controls, subscription charges or pay-per-view fees (<http://bmjopen.bmj.com>).

If you have any questions on BMJ Open's open peer review process please email [info.bmjopen@bmj.com](mailto:info.bmjopen@bmj.com)

# BMJ Open

## The Impact of a Powdered Meal Replacement on Metabolism and Gut Microbiota (PREMIUM) in Individuals with Excessive Body Weight: A Study Protocol for a Randomized Controlled Trial

|                               |                                                                                                                                                                                                                                                                                                                                                                                                                                                                                                                                                                                                                                                                                                                                                                                                                                                                                                                                                                                                                                                                                                                                                                                                                                                                                                                                                                                                                        |
|-------------------------------|------------------------------------------------------------------------------------------------------------------------------------------------------------------------------------------------------------------------------------------------------------------------------------------------------------------------------------------------------------------------------------------------------------------------------------------------------------------------------------------------------------------------------------------------------------------------------------------------------------------------------------------------------------------------------------------------------------------------------------------------------------------------------------------------------------------------------------------------------------------------------------------------------------------------------------------------------------------------------------------------------------------------------------------------------------------------------------------------------------------------------------------------------------------------------------------------------------------------------------------------------------------------------------------------------------------------------------------------------------------------------------------------------------------------|
| Journal:                      | <i>BMJ Open</i>                                                                                                                                                                                                                                                                                                                                                                                                                                                                                                                                                                                                                                                                                                                                                                                                                                                                                                                                                                                                                                                                                                                                                                                                                                                                                                                                                                                                        |
| Manuscript ID                 | bmjopen-2022-070027                                                                                                                                                                                                                                                                                                                                                                                                                                                                                                                                                                                                                                                                                                                                                                                                                                                                                                                                                                                                                                                                                                                                                                                                                                                                                                                                                                                                    |
| Article Type:                 | Protocol                                                                                                                                                                                                                                                                                                                                                                                                                                                                                                                                                                                                                                                                                                                                                                                                                                                                                                                                                                                                                                                                                                                                                                                                                                                                                                                                                                                                               |
| Date Submitted by the Author: | 10-Nov-2022                                                                                                                                                                                                                                                                                                                                                                                                                                                                                                                                                                                                                                                                                                                                                                                                                                                                                                                                                                                                                                                                                                                                                                                                                                                                                                                                                                                                            |
| Complete List of Authors:     | Montenegro, Julia; University of Alberta, Department of Agricultural, Food, and Nutritional Science<br>L. P. Oliveira, Camila ; University of Alberta, Department of Agricultural, Food and Nutritional Science<br>Armet, Anissa M.; University of Alberta, Department of Agricultural, Food and Nutritional Science<br>Berg, Aloys; University of Freiburg, Faculty of Medicine<br>Sharma, Arya; University of Alberta, Department of Medicine<br>Mereu, Laurie; University of Alberta, Department of Medicine<br>Cominetti, Cristiane; Universidade Federal de Goias, Faculdade de Nutrição<br>Ghosh, Sunita; University of Alberta, Department of Oncology<br>Richard, Caroline; University of Alberta, Department of Agricultural, Food and Nutritional Science<br>Nguyen, Nguyen ; Universite catholique de Louvain, Metabolism and Nutrition research group (MNUT); Walloon Excellence in Lifesciences and Biotechnology, WELBIO department<br>Cani, Patrice; Universite catholique de Louvain, Metabolism and Nutrition research group (MNUT); Walloon Excellence in Lifesciences and Biotechnology, WELBIO department<br>Walter, Jens; University of Alberta, Department of Agricultural, Food and Nutritional Science; University College Cork, APC Microbiome Ireland, School of Microbiology, and Department of Medicine<br>Prado, Carla; University of Alberta, Agricultural Food and Nutritional Sciences |
| Keywords:                     | NUTRITION & DIETETICS, IMMUNOLOGY, MICROBIOLOGY                                                                                                                                                                                                                                                                                                                                                                                                                                                                                                                                                                                                                                                                                                                                                                                                                                                                                                                                                                                                                                                                                                                                                                                                                                                                                                                                                                        |

SCHOLARONE™  
Manuscripts

1  
2  
3 1 **The Impact of a Powdered Meal Replacement on Metabolism and Gut Microbiota**  
4  
5 2 **(PREMIUM) in Individuals with Excessive Body Weight: A Study Protocol for a**  
6  
7 3 **Randomized Controlled Trial**  
8  
9

10 4 Julia Montenegro<sup>1\*</sup>, Camila L. P. Oliveira<sup>1\*</sup>, Anissa M. Armet<sup>1</sup>, Aloys Berg<sup>2</sup>, Arya M.  
11  
12 5 Sharma<sup>3</sup>, Laurie Mereu<sup>3</sup>, Cristiane Cominetti<sup>4</sup>, Sunita Ghosh<sup>5</sup>, Caroline Richard<sup>1</sup>, Nguyen K.  
13  
14 6 Nguyen<sup>6,7</sup>, Patrice D. Cani<sup>6,7</sup>, Jens Walter<sup>1,8\*</sup>, Carla M. Prado<sup>1\*</sup>  
15  
16  
17  
18  
19

20 8 <sup>1</sup>Department of Agricultural, Food and Nutritional Science, University of Alberta, Edmonton,  
21  
22 9 AB, Canada.

23  
24 10 <sup>2</sup>Faculty of Medicine, University of Freiburg, Freiburg, Germany.

25  
26 11 <sup>3</sup>Department of Medicine, University of Alberta, Edmonton, AB, Canada.

27  
28 12 <sup>4</sup>Faculty of Nutrition, Federal University of Goiás, Goiânia, GO, Brazil.

29  
30 13 <sup>5</sup>Department of Medical Oncology, University of Alberta, Edmonton, AB, Canada.

31  
32 14 <sup>6</sup>Metabolism and Nutrition research group (MNUT), UCLouvain, Université catholique de  
33  
34 15 Louvain, Louvain Drug Research Institute, 1200 Brussels, Belgium

35  
36 16 <sup>7</sup>Walloon Excellence in Life Sciences and BIOTEchnology (WELBIO), WELBIO department,  
37  
38 17 WEL Research Institute, avenue Pasteur, 6, 1300 Wavre, Belgium

39  
40 18 <sup>8</sup>APC Microbiome Ireland, School of Microbiology, and Department of Medicine, University  
41  
42 19 College Cork – National University of Ireland, Cork, Ireland.

43  
44 20 \* Authors contributed equally.

45  
46 21 \* Co-corresponding authors: carla.prado@ualberta.ca and jenswalter@ucc.ie.  
47  
48  
49  
50  
51  
52  
53  
54  
55  
56  
57  
58  
59  
60

## 22 **ABSTRACT**

23 *Introduction:* Excess body weight is associated with a state of low-grade chronic inflammation  
24 and alterations of the gut microbiome. Powdered meal replacements (PMR) have been shown  
25 to be an effective strategy for weight management; however, their effect on inflammation and  
26 the gut microbiome remains unclear. The aim of this 12-week randomized control clinical trial  
27 is to investigate the effects of PMR consumption on inflammation, gut microbiome, and overall  
28 metabolism in individuals with excessive body weight.

29 *Methods and analysis:* Healthy adults with excess body weight (n=88) are being recruited and  
30 randomly assigned to one of the following groups: a) Control group (CON): maintaining usual  
31 diet for 12 weeks, or b) PMR group: replacing morning and afternoon snacks daily with a PMR  
32 for 12 weeks. Participants are asked to maintain body weight throughout the study and fill out  
33 a journal with information about PMR consumption, body weight, food intake, appetite  
34 sensations, and medications. Three study visits are required: baseline, week 6, and week 12.  
35 Outcome measures include systemic inflammatory biomarkers, gut microbiome composition,  
36 metabolic blood markers, host energy metabolism, body composition, appetite sensations, and  
37 host gene expression profile.

38 *Ethics and dissemination:* This research protocol was approved by the University of Alberta  
39 Ethics Board (Pro00070712) and adheres to the Canadian Tri-Council Policy statement on the  
40 use of human participants in research. Procedures and potential risks are fully discussed with  
41 participants. Study findings will be disseminated in peer-reviewed journals, conference  
42 presentations, and social media.

43 *Registration details:* ClinicalTrials.gov identifier: NCT03235804.

44  
45 **Keywords:** Powdered meal replacement; obesity; inflammation; gut microbiome.

1  
2  
3 47 **ARTICLE SUMMARY**  
4

5 48 **Strengths and Limitations of this study**  
6

- 7  
8 49 • This will be the first 12-week randomized controlled clinical trial to investigate the  
9  
10 50 effects of a powdered meal replacement on inflammation, gut microbiome, metabolism,  
11  
12 51 and gene expression profile in weight-stable individuals with excess body weight.  
13  
14  
15 52 • Methodological strengths include the rigorous study design, the use of state-of-the-art  
16  
17 53 technology such as the metabolic chamber for indirect calorimetry, dual-energy X-ray  
18  
19 54 absorptiometry, and up-to-date methods for gut microbiome analysis, gene expression,  
20  
21 55 and genetic polymorphisms.  
22  
23  
24 56 • Additional strengths regarding study design include stable body weight throughout the  
25  
26 57 study period, regular assessments and follow-ups, and a comprehensive variety of  
27  
28 58 outcomes assessed.  
29  
30  
31 59 • The main limitation is the lack of placebo and the study is not double-blinded. The gut  
32  
33 60 microbiome analysis relies on fecal samples; thus, it may not capture changes in gut  
34  
35 61 microbiome composition of more proximal parts of gastrointestinal tract.  
36  
37  
38 62

39  
40 63 **Word-count:** 4241 words.  
41  
42  
43  
44  
45  
46  
47  
48  
49  
50  
51  
52  
53  
54  
55  
56  
57  
58  
59  
60

## 64 INTRODUCTION

65 Excess body weight can be defined as a body mass index (BMI)  $\geq 25.0$  kg/m<sup>2</sup> (1). This  
66 condition has been associated with a state of systemic low-grade chronic inflammation, which  
67 is characterized by a persistent activation of immune and non-immune cells and production of  
68 cytokines, chemokines, and acute phase proteins (2, 3). Those inflammatory biomarkers  
69 include interleukins (IL), such as IL-6 and IL-8, tumor necrosis factor- $\alpha$  (TNF- $\alpha$ ), and C-  
70 reactive protein (CRP) (2). Systemic low-grade chronic inflammation causes tissue and organ  
71 damage, which can, in turn, lead to the onset and progression of chronic diseases, such as  
72 diabetes mellitus, cancer, metabolic syndrome, and cardiovascular diseases (2).

73 In individuals with excessive body weight, the state of systemic low-grade chronic  
74 inflammation can be mediated by increased adiposity, as well as by mechanisms through the  
75 gut microbiota (2). Increased adipocyte size (i.e., hypertrophy) is associated with cellular  
76 dysfunction and distress (4, 5). Hypertrophic adipocytes secrete an increased number of pro-  
77 inflammatory chemokines, such as TNF- $\alpha$ , IL-6, IL-8, and monocyte chemoattractant protein  
78 1 (MCP-1) (3-5). The increased size of adipocytes and cytokine production lead to adipose  
79 tissue hypoxia and death, as well as local and systemic inflammation (3-5).

80 Excess body weight is associated with altered gut microbiome composition and reduced  
81 microbiome diversity, which might cause metabolic aberrations and enrich for opportunistic  
82 pathogens (e.g. at the epithelial interface) that contribute to inflammation (6, 7). Individuals  
83 with excessive body weight usually present with altered gut permeability, which elevates  
84 systemic levels of endotoxins (i.e., lipopolysaccharides) (2). When in the bloodstream,  
85 lipopolysaccharides binds to toll-like receptor 4 leading to activation of nuclear factor kappa B  
86 and consequently production of pro-inflammatory cytokines, including IL-6 and TNF- $\alpha$  (7).

87 Considering the numerous negative health outcomes associated with excess body  
88 weight, much effort has been made to develop effective weight management strategies. Among

1  
2  
3 89 those are meal replacements, which are food products fortified with vitamins and minerals used  
4  
5 90 to replace one or more meals per day. Meal replacements are commonly used in association  
6  
7 91 with calorie restriction. Research has shown that the consumption of meal replacements leads  
8  
9 92 to greater weight loss when compared to reduced-calorie diets alone (8, 9). Improvement in  
10  
11 93 metabolic parameters is generally observed with weight loss, including improvement in  
12  
13 94 glucose metabolism, reduction of triacylglycerol, low-density lipoprotein cholesterol (LDL-C),  
14  
15 95 systolic blood pressure (8, 10, 11), and the inflammatory markers CRP and IL-6 (12).  
16  
17 96 Considering the positive health effects of weight loss in individuals with excessive body weight  
18  
19 97 (13-15) and the beneficial health effects of meal replacements (8, 10), it is important to  
20  
21 98 differentiate the effects of meal replacements from that of weight loss on overall health, which  
22  
23 99 have not been investigated so far. Therefore, the aim of this study is to compare the effects of  
24  
25 100 a 12-week consumption of a powdered meal replacement (PMR group) versus usual diet  
26  
27 101 (control group, CON) on inflammation, gut microbiome, overall metabolic health, gene  
28  
29 102 expression profile, and genetic background in individuals with excessive body weight who are  
30  
31 103 in weight maintenance.  
32  
33  
34  
35  
36  
37  
38  
39

## 40 105 **METHODS**

### 41 106 **Study design and ethical procedures**

42  
43  
44 107 This study is a randomized, controlled, parallel group, clinical trial conducted at the  
45  
46 108 Human Nutrition Research Unit (HNRU), University of Alberta (Edmonton, AB, Canada). The  
47  
48 109 corresponding research protocol fulfils the requirements of the Standard Protocol Items:  
49  
50 110 Recommendations for Interventional Trials (SPIRIT) checklist (16). This research protocol was  
51  
52 111 approved by the University of Alberta Ethics Board (HREB, identifier Pro00070712) and  
53  
54 112 complies with the standards established by the Canadian Tri-Council Policy statement on the  
55  
56 113 use of human participants in research. Procedures and potential risks involved in the study are  
57  
58  
59  
60

114 discussed with participants prior to obtaining informed consent. This protocol is registered on  
 115 ClinicalTrials.gov (NCT03235804), and recruitment started on April 2019 and is expected to  
 116 finish in November 2023 (**Table 1**).

117 **Table 1.** World Health Organization trial registration dataset

| Data category                                 | Information                                                                                                                                                                                                                                                                                                                                                                                                                                     |
|-----------------------------------------------|-------------------------------------------------------------------------------------------------------------------------------------------------------------------------------------------------------------------------------------------------------------------------------------------------------------------------------------------------------------------------------------------------------------------------------------------------|
| Primary registry and trial identifying number | ClinicalTrials.gov NCT03235804                                                                                                                                                                                                                                                                                                                                                                                                                  |
| Date of registration in primary registry      | August 1, 2017                                                                                                                                                                                                                                                                                                                                                                                                                                  |
| Secondary identifying numbers                 | University of Alberta Research Ethics Board # Pro00070712                                                                                                                                                                                                                                                                                                                                                                                       |
| Source(s) of monetary or material support     | Almased Wellness-GmbH (Bienenbüttel, Germany)                                                                                                                                                                                                                                                                                                                                                                                                   |
| Primary sponsor                               | Almased Wellness-GmbH (Bienenbüttel, Germany)                                                                                                                                                                                                                                                                                                                                                                                                   |
| Secondary sponsor(s)                          | N/A                                                                                                                                                                                                                                                                                                                                                                                                                                             |
| Contact for public queries                    | Dr Carla Prado +1 (780) 492-9555 <a href="mailto:carla.prado@ualberta.ca">carla.prado@ualberta.ca</a> and Jens Walter +353 (0)21 490-1773 <a href="mailto:jenswalter@ucc.ie">jenswalter@ucc.ie</a>                                                                                                                                                                                                                                              |
| Contact for scientific queries                | Dr Carla Prado +1 (780) 492-9555 <a href="mailto:carla.prado@ualberta.ca">carla.prado@ualberta.ca</a> and Jens Walter +353 (0)21 490-1773 <a href="mailto:jenswalter@ucc.ie">jenswalter@ucc.ie</a>                                                                                                                                                                                                                                              |
| Public title                                  | The impact of a powdered meal replacement on metabolism and gut microbiota (Premium Study)                                                                                                                                                                                                                                                                                                                                                      |
| Scientific title                              | The impact of a powdered meal replacement on metabolism and gut microbiota: a 12-week study in individuals with excessive body weight (The PREMIUM Study)                                                                                                                                                                                                                                                                                       |
| Countries of recruitment                      | Canada                                                                                                                                                                                                                                                                                                                                                                                                                                          |
| Health condition(s) or problem(s) studied     | Overweight and obesity                                                                                                                                                                                                                                                                                                                                                                                                                          |
| Intervention(s)                               | Powdered meal replacement                                                                                                                                                                                                                                                                                                                                                                                                                       |
| Key inclusion and exclusion criteria          | Inclusion Criteria: (a) female/male aged 18 to 50 years; (b) non-smoker; (c) body mass index (BMI) between 25 and 37 kg/m <sup>2</sup> ; (d) weight stable; (e) fat mass ≥20% for men and ≥25% for women; (f) stable physical activity level.<br><br>Exclusion Criteria: (a) diagnosis of chronic diseases or acute infections; (b) taking any medication that may alter study outcomes; (c) taking pre- and probiotics; (d) use of antibiotics |



|                                                     |                                                                                                   |
|-----------------------------------------------------|---------------------------------------------------------------------------------------------------|
|                                                     | in the past two months; (e) females that are pregnant or lactating.                               |
| Study type                                          | Randomized controlled trial                                                                       |
| Date of first enrolment                             | April 1, 2019                                                                                     |
| Sample size                                         | 88                                                                                                |
| Recruitment status                                  | Actively recruiting                                                                               |
| Primary outcome(s)                                  | Interleukin-6                                                                                     |
| Key secondary outcomes                              | Gut microbiota                                                                                    |
| Ethics review                                       | University of Alberta Research Ethics Board # Pro00070712                                         |
| Completion date                                     | N/A                                                                                               |
| Summary results                                     | N/A                                                                                               |
| Individual Participant Data (IPD) sharing statement | De-identified data will be shared with the participant upon completion of the study (publication) |

118

### 119 Outcome measures

120 The primary study outcome is change in IL-6 concentration over time (within groups) and  
 121 between the PMR and CON groups. Secondary outcome is change in gut microbiome  
 122 composition over time (within groups) and between the PMR and CON groups. Exploratory  
 123 outcomes include:

- 124 • Change in markers of systemic inflammation (high-sensitivity CRP [hs-CRP], IL-8, and  
 125 TNF- $\alpha$ ) and immune modulation (IL-10) over time (within groups) and between the  
 126 PMR and CON groups.
- 127 • Change in concentrations of metabolic blood markers (glucose, insulin, total  
 128 cholesterol, LDL-C, high-density lipoprotein cholesterol [HDL-C], triglycerides,  
 129 peptide tyrosine-tyrosine [PYY], glucagon-like peptide-1 [GLP-1], ghrelin,  
 130 adiponectin, leptin, free glycerol, free fatty acids, and thyroid stimulating hormone  
 131 [TSH]) over time (within groups) and between the PMR and CON groups.

- 1  
2  
3 132 • Change in resting energy expenditure (REE) and respiratory exchange ratio (RER) over  
4  
5 133 time (within groups) and between the PMR and CON groups.  
6  
7  
8 134 • Change in body composition (fat mass [FM] and lean soft tissue [LST]) over time  
9  
10 135 (within groups) and between the PMR and CON groups.  
11  
12  
13 136 • Change in appetite sensations (hunger, satiety, fullness, and prospective food  
14  
15 137 consumption) over time within the PMR group.  
16  
17 138 • Differences in the responses to the intervention according to genetic polymorphisms  
18  
19 139 over time.  
20  
21  
22 140 • Changes in inflammation and excess body weight-related gene expression profile over  
23  
24 141 time and between the PMR and CON groups.  
25  
26  
27 142

### 143 **Research participants**

144 Inclusion criteria are as follows: male or female; non-smoker; between 18 and 50 years  
145 of age; BMI between 25.0 and 37.0 kg/m<sup>2</sup>; with a stable body weight 6 months prior to study  
146 initiation (i.e., variation <5 kg); fat mass ≥20% for males and ≥25% for females; willingness  
147 to maintain stable physical activity level throughout the study; and females must use effective  
148 birth control methods.

149 Exclusion criteria includes participation in >3 hours per week of vigorous physical  
150 activity; pregnancy or lactation; diagnosis of any chronic or acute diseases (except for excess  
151 body weight); use of any medication that impacts study outcomes, except for antidepressants,  
152 anxiolytic, and/or thyroid replacement therapy in a stable dose 3 months prior to study initiation  
153 and throughout the study period; use of antibiotics 2 months prior to study initiation; use of  
154 protein supplements 1 month prior to study initiation; allergy to PMR ingredients (soy, honey,  
155 and yogurt); allergy or intolerance to soy, gluten, and/or lactose; following a vegetarian, vegan,  
156 or any other restrictive dietary pattern; claustrophobia; or being unable to comprehend and

1  
2  
3 157 complete the required questionnaires. Participants consuming supplements or food items that  
4  
5 158 contain pre- or probiotics (e.g., kefir or kombucha) before being enrolled in the study will be  
6  
7 159 asked to discontinue the use of these products and wait 1 month before starting the study. The  
8  
9 160 use of other nutritional supplements, such as multivitamins and vitamin D<sub>3</sub> will be allowed if  
10  
11 161 on a stable dose.  
12  
13  
14  
15  
16

### 17 163 **Recruitment, randomization, and intervention**

18  
19 164 Study advertisement is done using flyers displayed at the University of Alberta  
20  
21 165 campuses, surrounding communities, other post-secondary education institutions in Edmonton  
22  
23 166 (AB, Canada), and health care centres in the city. The study is also advertised in University of  
24  
25 167 Alberta email lists, newspapers, classrooms presentations, and on social media (e.g., Kijiji,  
26  
27 168 Facebook, and Twitter). Additionally, a personalized website (premium.ualberta.ca) was  
28  
29 169 created.  
30  
31  
32

33 170 Individuals interested in being part of the study will be invited to attend a screening  
34  
35 171 visit at the HNRU. This visit will include anthropometric measurements (i.e., height, weight,  
36  
37 172 and waist circumference), body composition assessment (bioelectrical impedance analysis  
38  
39 173 [BIA]), blood tests (i.e., creatinine, estimated glomerular filtration rate [eGFR], albumin,  
40  
41 174 aspartate transaminase [AST], alanine transaminase [ALT], sodium, potassium, chloride, and  
42  
43 175 TSH), review of medical history, and completion of a physical activity questionnaire. If deemed  
44  
45 176 eligible, participants are randomly assigned into either the CON or PMR group. Randomization  
46  
47 177 is stratified by sex using a Microsoft Office Excel<sup>®</sup> spreadsheet.  
48  
49  
50

51 178 Participants assigned to the CON group are asked to maintain their usual diet for 12  
52  
53 179 weeks. The ones in the PMR group are asked to replace their morning and afternoon snacks  
54  
55 180 using a powdered meal replacement (Almased USA, Inc., St. Petersburg, FL, USA) and  
56  
57 181 otherwise maintain their usual diet for 12 weeks. Each snack is replaced by 50 grams of powder  
58  
59  
60

182 mixed with 250 mL of water. The nutritional information of the meal replacement is displayed  
 183 in **Table 2**.

184 **Table 2.** Nutritional information of the powdered meal replacement (PMR)

| Nutrient                       | 50 g of Product (PMR) |
|--------------------------------|-----------------------|
| Calories (kcal)                | 180                   |
| Total fat (g)                  | 1.0                   |
| <i>Saturated fat (g)</i>       | 0.5                   |
| <i>Trans fat (g)</i>           | 0                     |
| <i>Polyunsaturated fat (g)</i> | 0.1                   |
| <i>Monounsaturated fat (g)</i> | 0.4                   |
| Cholesterol (mg)               | 3                     |
| Total carbohydrates (g)        | 15                    |
| <i>Dietary fiber (g)</i>       | 0.5                   |
| <i>Sugars (g)</i>              | 15                    |
| Protein (g)                    | 27                    |
| Sodium (mg)                    | 340                   |
| Potassium (mg)                 | 500                   |
| Vitamin A (IU)                 | 794                   |
| Vitamin C (mg)                 | 16                    |
| Vitamin E (IU)                 | 6                     |
| Thiamin (Vitamin B1) (mg)      | 5                     |
| Riboflavin (Vitamin B2) (mg)   | 6                     |
| Vitamin B6 (mg)                | 7                     |
| Calcium (mg)                   | 215                   |

|           |     |
|-----------|-----|
| Iron (mg) | 4.9 |
|-----------|-----|

185

186

### 187 **Experimental protocol**

188 The study design is illustrated in **Figure 1**. The schedule of enrollment, interventions,  
189 and assessments are shown in **Figure 2**. Following the screening visit and randomization  
190 process, enrolled participants are invited to attend 3 study visits: baseline, week 6, and week  
191 12. Assessments during each of these visits include: 1-hour resting metabolic rate (RMR),  
192 blood draw, body composition, and physical activity questionnaire. They additionally receive  
193 stool collection kits and instructions for fecal sample collection. During the baseline visit,  
194 participants receive a scale and a journal to record the following information daily: body  
195 weight, date and time of meal replacement intake (PMR group only), and medication intake (if  
196 any). They are also asked to record on a weekly basis a 24h dietary recall (both groups) and fill  
197 out appetite sensation questionnaires (PMR group only). Instructions on how to fill out the  
198 journal and dietary records are given. Additionally, participants assigned to the PMR group  
199 receive 84 packages of the PMR during visits at baseline and week 6, as well as instructions on  
200 how to prepare it. Those assigned to the PMR group start consuming the supplement the day  
201 after the first stool sample collection. Study materials (study journal and scale) are returned on  
202 week 12.

203 A member of the study team contacts participants weekly to verify adherence to the  
204 dietary intervention and potential adverse events. Their body weight is also discussed at that  
205 time. If a body weight change greater than  $\pm 2\%$  of their initial body weight is noticed, a  
206 nutrition consult with a Registered Dietitian is scheduled to provide instructions on how to  
207 increase or decrease food intake and physical activity levels to return to baseline body weight.

208

1  
2  
3 209 *Anthropometry and body composition*  
4

5 210 At the screening visit, anthropometric measurements are taken twice, and the average  
6  
7 211 is used for data analysis. Height is measured using a digital stadiometer (235 Heightronic™,  
8  
9 212 Concepts, Quick Medical, Snoqualmie, WA, USA) to the nearest 0.1 cm. Body weight is  
10  
11 213 measured to the nearest 0.1 kg using a calibrated digital scale (Health-o-meter® Professional  
12  
13 214 Remote Display, Sunbeam Products Inc., FL, USA). Waist circumference is measured using a  
14  
15 215 measuring tape at the level of participant's belly button, as per standard procedure (17).

16  
17 216 A digital scale (HD-314 TANITA Corporation, Tokyo, Japan) is provided to  
18  
19 217 participants during the baseline visit, which is returned at the study completion. Body weight  
20  
21 218 is recorded daily in the morning in a fasting state, and with an empty bladder.

22  
23 219 Body composition is assessed using dual energy X-ray absorptiometry (DXA, GE  
24  
25 220 Lunar iDXA, General Electric Company, Madison, USA), air displacement plethysmography  
26  
27 221 (ADP, Bod Pod 1SB-060M, Life Measurement Instruments, Concord, CA, USA), and BIA  
28  
29 222 (Seca mBCA525, Seca GmbH & Co, Hamburg, Germany). A number of techniques is being  
30  
31 223 used to explore potential changes in body composition using multicompartment modeling (18,  
32  
33 224 19).

34  
35 225  
36  
37 226 *Resting energy expenditure*  
38  
39

40  
41 227 Resting energy expenditure is assessed by indirect calorimetry using an open-circuit  
42  
43 228 metabolic chamber, which measures the volume of oxygen (O<sub>2</sub>) and carbon dioxide (CO<sub>2</sub>) from  
44  
45 229 participant's respiration. Participants lie down in a relaxed position without falling asleep and  
46  
47 230 breathe normally for 60 minutes. Mixed air with the expired CO<sub>2</sub> is drawn from the chamber  
48  
49 231 at a constant flow rate (60 ± 2 L/min) while fresh air with constant O<sub>2</sub> is passively drawn into  
50  
51 232 the chamber. The first 30 minutes of the test are considered time for acclimatization and hence  
52  
53 233 removed from analysis. Gas exchange (volume of CO<sub>2</sub> and O<sub>2</sub>) is analysed minute-by-minute  
54  
55  
56  
57  
58  
59  
60

234 by the Advance Optima AO2000 Series CO<sub>2</sub> analyser (ABB Automation GmbH, Frankfurt,  
 235 Germany) and the Oxymat 6 O<sub>2</sub> analyser (Siemens AG, Munich, Germany). Data is transferred  
 236 from those analysers to a computer (Acer Aspire AM3910-E3122, Acer Inc., New Taipei City,  
 237 Taiwan) via the National Instruments NI USB-6221 device (National Instruments Corporation,  
 238 Austin, Tex., USA) using the PMCSS Software version 1.8 (Pennington Metabolic Chamber  
 239 Software Suite, Pennington Biomedical Research Center, La., USA). Resting energy  
 240 expenditure (kcal/day) is calculated using the average kcal/min multiplied by 1440.

241

### 242 *Blood analysis*

243 Blood is sampled from participants by venipuncture after an overnight fast during the  
 244 screening visit and at baseline, week 6, and week 12. Evaluated biomarkers are listed in **Table**  
 245 **3**.

246 **Table 3.** Blood parameters, sample, and laboratory responsible for blood analysis

| Parameter                 | Screening | Baseline | Week 6 | Week 12 | Sample | Laboratory |
|---------------------------|-----------|----------|--------|---------|--------|------------|
| Albumin                   | x         |          |        |         | Serum  | External   |
| Creatinine/eGFR           | x         |          |        |         | Serum  | External   |
| ALT                       | x         |          |        |         | Serum  | External   |
| AST                       | x         |          |        |         | Serum  | External   |
| Electrolytes <sup>a</sup> | x         |          |        |         | Serum  | External   |
| TSH                       | x         | x        | x      | x       | Serum  | External   |
| hs-CRP                    |           | x        | x      | x       | Serum  | External   |
| Glucose                   |           | x        | x      | x       | Serum  | External   |
| Insulin                   |           | x        | x      | x       | Serum  | External   |
| Lipid panel <sup>b</sup>  |           | x        | x      | x       | Serum  | External   |
| Leptin                    |           | x        | x      | x       | Serum  | On site    |

|                           |   |   |   |             |         |
|---------------------------|---|---|---|-------------|---------|
| Free glycerol             | x | x | x | Serum       | On site |
| Free fatty acids          | x | x | x | Serum       | On site |
| Interleukins <sup>c</sup> | x | x | x | Plasma      | On site |
| TNF- $\alpha$             | x | x | x | Plasma      | On site |
| Adiponectin               | x | x | x | Plasma      | On site |
| PYY                       | x | x | x | Plasma      | On site |
| GLP-1                     | x | x | x | Plasma      | On site |
| Ghrelin                   | x | x | x | Plasma      | On site |
| Polymorphisms             | x |   |   | Whole blood | On site |
| Gene expression           | x |   | x | Whole blood | On site |

<sup>a</sup> Electrolytes include chloride, sodium, and potassium. <sup>b</sup> Lipid panel include triglycerides, total cholesterol, LDL-C, and HDL-C. <sup>c</sup> Interleukins include IL-6, IL-8, and IL-10. Abbreviations: ALT alanine aminotransferase; AST aspartate aminotransferase; eGFR estimated glomerular filtration rate; GLP-1 glucagon like peptide; hs-CRP high-sensitivity C-reactive protein; PYY peptide tyrosine-tyrosine; TNF- $\alpha$  tumor necrosis factor  $\alpha$ ; TSH thyroid stimulating hormone.

Blood samples are collected using BD Vacutainer<sup>®</sup> tubes (Becton, Dickinson and Company, Franklin Lakes, NJ, USA). Tubes containing silica and a polymer are used for serum separation, tubes containing K2-ethylenediaminetetraacetic acid (EDTA) are used for plasma separation, and tubes containing K2EDTA and protease inhibitors (dipotassium and tacrine, BD P800) are used for GLP-1 and ghrelin analysis.

Creatinine, eGFR, albumin, AST, ALT, sodium, potassium, chloride, and TSH are analysed by an external lab (DynaLIFE Medical Labs, Edmonton, AB, Canada) at the screening visit prior to enrollment. Glucose, insulin, lipid panel (triglycerides, total cholesterol, LDL-C, and HDL-C), TSH, and hs-CRP will be analysed by DynaLIFE Medical Labs (Edmonton, AB,



1  
2  
3 262 Canada). Interleukin 6, IL-8, IL-10, TNF- $\alpha$ , PYY, GLP-1, ghrelin, adiponectin, leptin, free  
4  
5 263 glycerol, and free fatty acids will be analysed in our laboratory (University of Alberta, AB,  
6  
7  
8 264 Canada).

9  
10 265 An additional blood draw is requested the day following each study visit for hs-CRP  
11  
12 266 analysis due to this being a sensitive marker which can vary substantially within hours of  
13  
14 267 collection for several reasons (20). Therefore, the average of CRP measured on two consecutive  
15  
16 268 days will be taken in case they are similar. If a participant is in an infectious state (i.e., CRP  
17  
18 269 >10 mg/L or significant changes between the two days measurement) the highest value will be  
19  
20  
21 270 excluded from analysis.

22  
23  
24 271 For gene expression profile, ribonucleic acids (RNAs) will be sequenced at baseline  
25  
26 272 and week 12. Whole blood (500  $\mu$ L) is aliquoted into an RNase-free microfuge tube and added  
27  
28 273 1.3 mL of RNAlater stabilization solution (Thermo Fisher Scientific, Waltham, MA, USA).  
29  
30 274 Total RNA will be extracted from whole blood using the RiboPure™ Blood Kit (Thermo Fisher  
31  
32 275 Scientific, Waltham, USA). The RNA purity will be determined by measuring the 260/280 nm  
33  
34 276 ratio (ideal ratio ~2.0) and the 260/230 nm ratio (ideal ratio 2.0-2.2) using a spectrophotometer.  
35  
36 277 The quality of RNA samples will be evaluated prior to library preparation for RNA-Seq, using  
37  
38 278 a bioanalyzer and an RNA Integrity Number (RIN)  $\geq 7$  will be accepted. Samples of high purity  
39  
40 279 and quality RNA will be prepared with the TruSeq RNA Sample Prep kit (Illumina, San Diego,  
41  
42 280 USA). The sequencing will be performed by an external company using the platform Illumina  
43  
44 281 HiSeq 4000 (Illumina, San Diego, USA), in the paired-end mode, in which the 2 ends will be  
45  
46 282 sequenced with a length of 100 base pairs (bp) (2 x 100 bp). At the end, 2 files in the 'fastq'  
47  
48 283 format will be generated for each of the evaluated samples. The evaluation of the quality of the  
49  
50 284 sequences will be performed with the FastQC tool. The Trimmomatic software (21) will be  
51  
52 285 used to remove low-quality strings and adapters. Then, the libraries will be evaluated again in  
53  
54 286 the FastQC software, for proper verification. The RNA sequencing data will be subjected to  
55  
56  
57  
58  
59  
60

1  
2  
3 287 analysis by RNA-seq using the protocol described in Trapnell, Roberts (22). The functional  
4  
5 288 annotation of differentially expressed genes will be carried out through the GeneOntology  
6  
7 289 platform (<http://geneontology.org>). Analyses to identify differentially expressed metabolic  
8  
9  
10 290 pathways will be performed using the fgsea package of the R software.

11  
12 291 Genetic polymorphisms will be analysed at baseline. Genomic deoxyribonucleic acid  
13  
14 292 (gDNA) will be extracted with the QIAamp DNA Micro Kit (Qiagen, Hilden, Germany) from  
15  
16  
17 293 leukocytes in peripheral blood. The gDNA purity will be verified in a spectrophotometer at  
18  
19 294 260 and 280 nm. The samples will be considered of good quality if the ratio between  
20  
21 295 absorbances is between 1.7 and 2.0. The gDNA concentration will be measured on a  
22  
23 296 fluorimeter. For genotyping, a customized Infinium Global Screening Array-24 + v3.0 Kit  
24  
25 297 (Illumina, San Diego, USA) will be used. Inflammation and excess body weight-related genetic  
26  
27 298 polymorphisms will be analyzed, which will be selected from the results of the differential  
28  
29 299 expression of genes, and will be evaluated with the R package 'argyle' (23).

30  
31  
32  
33 300

### 34 35 301 *Fecal sample collection and gut microbiome sequencing*

36  
37 302 A total of three fecal samples are collected at baseline, week 6, and week 12. Fecal  
38  
39 303 samples are either collected at the HNRU the day of the study visits, or at home, kept at room  
40  
41 304 temperature, and delivered to the HNRU as soon as possible. During the baseline visit,  
42  
43 305 participants are instructed on how to collect fecal samples using the provided collection kits.  
44  
45 306 The fecal collection tubes (DNA/RNA Shield, Zymo Research, Irvine, CA, USA) preserve  
46  
47 307 nucleic acids in the sample and maintain stability at room temperature. Once delivered to the  
48  
49 308 lab, the fecal sample tubes are frozen at -80°C until processing and analysis.

50  
51 309 The microbial DNA will be extracted from all samples including positive and negative  
52  
53 310 controls, using QIAamp Fast DNA Stool Mini Kit as previously described (24), packed with  
54  
55 311 dried-ice, and shipped to University of Minnesota Genomic Center (Minnesota, US) for  
56  
57  
58  
59  
60

1  
2  
3 312 sequencing. Shipping will adhere the regulation of Environment, Health and Safety  
4  
5 313 Department, University of Alberta. MiSeq Illumina technology (300 bp pair-end) will be used  
6  
7  
8 314 to sequence 16S ribosomal ribonucleic acid (rRNA) targeting V5-V6 region to characterize the  
9  
10 315 fecal microbiome composition using primer pair 784F [5'-RGGATTAGATACCC -3'] and  
11  
12 316 1064R [5'-CGACRRCCATGCANACCT-3'].

317

### 318 *Physical activity questionnaire*

319 The Godin-Shephard leisure-time physical activity questionnaire will be completed at  
320 baseline, week 6, and week 12 to estimate physical activity levels (25, 26). In this questionnaire,  
321 participants answer how often they perform strenuous, moderate, and light exercise for more  
322 than 15 minutes in one week. A physical activity score is calculated based on intensity =  $(9 \times$   
323  $\text{strenuous}) + (5 \times \text{moderate}) + (3 \times \text{light})$  (26, 27). This will be used to classify participants as  
324 insufficiently active ( $<14$  units), moderately active ( $\geq 14$  and  $<24$  units), or active ( $\geq 24$  units)  
325 (27).

326

### 327 *Dietary intake*

328 The dietary intake will be assessed using the online Automated Self-Administered 24-  
329 hour Recall (ASA24<sup>®</sup>) Canada (28). A paper-based version is available per individual  
330 participant and is returned to the study team weekly by email or fax. Dietary information is  
331 entered in ASA24<sup>®</sup> to ensure consistency. Three 24h recalls are completed at weeks 1, 6, and  
332 12 (two weekdays and one weekend day) and one 24h recall per week on the remaining weeks  
333 of the study period (one weekday). Energy, macronutrients, and micronutrients intake will be  
334 obtained using ASA24<sup>®</sup> automated coding based on the amount of each food consumed.

335

### 336 *Appetite sensations*

1  
2  
3 337 To assess how the PMR affects appetite, participants assigned to the PMR group rate  
4  
5 338 their appetite sensations using the study journals once a week and at five timepoints: 1)  
6  
7 339 immediately after waking up/fasting, 2) immediately before the morning PMR consumption,  
8  
9 340 3) 30 minutes after the morning PMR consumption, 4) immediately before the afternoon PMR  
10  
11 341 consumption, and 5) 30 minutes after the afternoon PMR consumption. Hunger, satiety,  
12  
13 342 fullness, and prospective food consumption will be assessed using a paper-and-pen 100-mm  
14  
15 343 visual analogue scale (29). They are instructed to make a single vertical mark between 2  
16  
17 344 anchors to indicate the intensity of their subjective states regarding each element, on a scale  
18  
19 345 from 0 to 100 mm. The following questions are asked: How hungry do you feel? (I am not  
20  
21 346 hungry at all – I have never been more hungry); How satisfied do you feel? (I am completely  
22  
23 347 empty – I cannot eat another bite); How full do you feel? (not at all full – totally full); How  
24  
25 348 much do you think you can eat? (nothing at all – a lot).

30  
31 349

### 32 350 *Adherence and withdraw/discontinuation*

33  
34  
35 351 Participants are immediately withdrawn from the study if they: 1) have significant  
36  
37 352 variation in body weight ( $>\pm 2\%$  of baseline body weight) that does not return to baseline 2  
38  
39 353 weeks after the nutrition consult; 2) become pregnant; 3) start or change medications or  
40  
41 354 supplement intake listed in the eligibility criteria; 4) no longer meet the inclusion criteria.  
42  
43 355 Participants assigned to the PMR group are asked to return all supplement bags (empty or not)  
44  
45 356 to the visits on week 6 and 12. These are weighted, and participants are excluded from the  
46  
47 357 study if the PMR have not been consumed twice daily during the 12 weeks or if there is  $>20\%$   
48  
49 358 of product left inside the bags. In addition, participants can withdraw from the study at any  
50  
51 359 time.

52  
53  
54 360

### 55 361 **Statistical analyses**

1  
2  
3 362 *Sample size estimate*  
4

5 363 A total of 74 participants (37 in each group) will be needed to detect a medium effect  
6 size of 0.669. The effect size was calculated based on a previously published study (30), in  
7  
8 364 which the mean percent change in IL-6 from baseline to 12 months was  $-6.76 \pm 36.95$  pg/mL  
9  
10 365 in a group receiving soy protein versus  $17.62 \pm 35.92$  pg/mL in the control group. Accounting  
11  
12 366 for a 20% attrition rate, the total sample size of 88 participants (44 in each group) will have a  
13  
14 367 power of 80% with a significance level of 5%. The sample size calculation was done using  
15  
16 368 G\*Power version 3.1.9.2. Interim analysis will be conducted (n=44), and sample size will be  
17  
18 369 adjusted accordingly.  
19  
20  
21  
22  
23

24 371

25  
26 372 *Data analysis*  
27

28 373 Normality of the study variables will be assessed by the Shapiro-Wilk W-test. By  
29  
30 374 inspecting boxplots, values  $>1.5$  box-lengths from the edge of the box will be considered as  
31  
32 375 outliers and may be excluded from analysis. Baseline characteristics between groups will be  
33  
34 376 assessed by the independent t-test or Mann–Whitney test, according to data distribution.  
35  
36 377 Differences between groups of nominal variables will be analysed by Pearson's  $\chi^2$  test or  
37  
38 378 Fisher's exact test. Both group effect and time effect will be analyzed using a two-way mixed  
39  
40 379 analysis of variance (ANOVA) or analysis of covariance (ANCOVA) as appropriate.  
41  
42 380 Assumption of homogeneity of variances will be tested using Levene's test of equality of  
43  
44 381 variances. Correlation between variables will be assessed by Pearson's correlation. If  
45  
46 382 significant correlations between nutrients and energy intake are noticed, the residual method  
47  
48 383 will be applied in order to describe the relationship between aspects of food intake and  
49  
50 384 biochemical characteristics independent of energy intake (31). All analyses will be performed  
51  
52 385 using IBM® SPSS® Statistics version 24 (International Business Machines Corporation),  
53  
54 386 considering a critical significance value of 5%, unless otherwise stated.  
55  
56  
57  
58  
59  
60

1  
2  
3 387 Regarding genetic polymorphisms analysis, adherence to the Hardy-Weinberg  
4  
5 388 equilibrium will be checked using the  $\chi^2$ -square test. To verify whether the results differ among  
6  
7 389 the genotypes, the dominant model (major allele x heterozygous + minor allele) will be applied.  
8  
9  
10 390 Effect size (ES) will be assessed by Cohen's d-test and multivariate analysis (MANOVA) will  
11  
12 391 be applied, including time and genotype as the two independent variables. For post-hoc  
13  
14 392 analysis, the Stell Dwass test ( $p < 0.05$ ) will be applied. Statistical analysis of the gene  
15  
16 393 expression profile will be performed with bioinformatic tools.

17  
18  
19 394 For the gut microbiome analysis, raw sequencing data will be undergone multiple  
20  
21 395 quality control steps including primer removal, trimming, chimera removal as previously  
22  
23 396 described (32, 33). Sequences will be classified using classify-sklearn algorithm (34) against  
24  
25 397 Silva database v.138 generated for given primers by RESCRIPT (35). To decontamination, non-  
26  
27 398 target sequences will be removed such as mitochondria, chloroplast and archaea. Possible  
28  
29 399 contamination detected by positive and negative controls and sequences with raw count  $< 3$  and  
30  
31 400 present in  $< 10\%$  of samples will be removed. Sample with an extremely low number of reads  
32  
33 401 ( $< 2000$  after filtering) will not be considered in microbiome analysis. Filtered ASV table in  
34  
35 402 count data will be converted to relative abundant data for visualisation, then centered log-ratio  
36  
37 403 (CLR) transformed. The indices of  $\alpha$ -diversity (e.g., observed species, Shannon, Phylogenetic  
38  
39 404 Diversity, Inver Simpson) and  $\beta$ -diversity (e.g., Bray-Curtis and Aitchison distance) will be  
40  
41 405 calculated using Phyloseq (36) and microbiome (37) R packages. Bray-Curtis distance will be  
42  
43 406 used to generate non-parametric multidimensional scaling ordination plots for  $\beta$ -diversity  
44  
45 407 metrics with scaled and centered results. Stability over time will also be assessed based on  
46  
47 408 Bray-Curtis distances. The adonis2 function in R package vegan will be used for permutational  
48  
49 409 multivariate analysis of variance (PERMANOVA). Aitchison distance will be used for  
50  
51 410 Principal component analysis (PCA) in mapping microbiome and metabolic markers data to  
52  
53  
54  
55  
56  
57  
58  
59  
60

1  
2  
3 411 exploring multidimensional association (24). False discovery rate (FDR) will be used to adjust  
4  
5 412 p values, and  $FDR < 0.05$  will be considered as statistically significant.  
6  
7

8 413

9  
10 414 **Patient and public involvement:**

11  
12 415 None.  
13  
14

15 416

16  
17 417 **ETHICS AND DISSEMINATION**

18  
19 418 This study is approved by the University of Alberta's HREB (Pro00070712) and is  
20  
21 419 registered on ClinicalTrials.gov (NCT03235804). This research adheres to the standards as set  
22  
23 420 out in the Canadian Tri-Council Policy statement on the use of human participants in research.  
24  
25 421 This study is regulated by Health Canada. Amendments will be submitted to the HREB and  
26  
27 422 Health Canada review and approval prior implementations. ClinicalTrials.gov will be updated  
28  
29 423 accordingly.  
30  
31

32  
33 424 All personal information is kept private, and participation is anonymous. Participants  
34  
35 425 are assigned a study ID, which is kept separated from any personal information collected. A  
36  
37 426 master list with identifiable information and study IDs is cryptographically protected and stored  
38  
39 427 at the HNRU. All personal information will be kept in a locked cabinet for 5 years after the  
40  
41 428 completion of the study. If participants withdraw consent, they are asked for permission to use  
42  
43 429 the data collected until that point; however, if they deny it, their data is destroyed. Absence of  
44  
45 430 answer is considered as permission to use the data. The Quality Management in Clinical  
46  
47 431 Research (QMCR) Department at the University of Alberta is independent of investigators and  
48  
49 432 sponsor. The QMCR is responsible for monitoring the study data and will conduct yearly  
50  
51 433 auditing.  
52  
53

54  
55  
56 434 Following data collection, analysis, and review of findings, manuscripts will be  
57  
58 435 prepared for submission to peer-reviewed journals and results presented in national and  
59  
60

1  
2  
3 436 international conferences. Study findings will also be disseminated through social media. Data  
4  
5 437 will be published regardless of outcomes and the University of Alberta retains the right to  
6  
7 438 publish. Authorship eligibility will adhere to the International Committee of Medical Journal  
8  
9 439 Editors' recommended guidelines (38). As a mandate of completing a registered trial, the  
10  
11 440 results must be published within 12 months of the completion of the trial. Dataset and statistical  
12  
13 441 code may be provided upon request.  
14  
15  
16  
17 442

18  
19 443 **Figure legends:**

20  
21 444 **Figure 1.** Experimental protocol. Abbreviations: CON control group, PMR powdered meal  
22  
23 replacement group.  
24  
25

26 446 **Figure 2.** Schedule of enrollment, interventions, and assessments (SPIRIT figure).  
27  
28 447 Abbreviations: CON control group, PMR powdered meal replacement group.  
29  
30

31 448

32  
33 449 **Author contributions:**

34  
35 450 All authors were involved in the design of the study. JM, CLPO, AMS, JW, and CMP wrote  
36  
37 451 the study protocol. All authors participated in drafting and revising the manuscript. All authors  
38  
39 452 read and approved the final manuscript.  
40  
41  
42

43 453

44  
45 454 **Funding statement:** This was an investigator-initiated trial supported by Almased Wellness-  
46  
47 455 GmbH (Bienenbüttel, Germany). Per contractual agreement, the funder has had no role in the  
48  
49 456 study design and implementation, writing of the manuscript, and decision to submit the article  
50  
51 457 for publication. Some of the infrastructure used in the project was funded by the Canadian  
52  
53 458 Foundation for Innovation John R Evans Leaders Fund (Project # 34115). CMP is supported  
54  
55 459 by a Campus Alberta Innovates Program Chair in Nutrition, Food and Health. CLPO is  
56  
57  
58  
59  
60



1  
2  
3 460 supported by the Mitacs Accelerate International (Mitacs, Canada) in partnership with Almased  
4  
5 461 USA Inc.  
6  
7  
8 462

9  
10 463 **Competing interests' statement:** In addition to what is noted under "Funding", CLPO reports  
11  
12 464 receiving honoraria and/or paid consultancy from Abbott and AMRA Medical Inc. outside the  
13  
14 465 scope of this work. AB received research support for their departments and consultant or  
15  
16 466 speakers' honoraria from the Almased-Wellness-GmbH. AMS reports receiving honoraria  
17  
18 467 and/or paid consultancy from Novo Nordisk, Johnson & Johnson, Boehringer Ingelheim, and  
19  
20 468 Xeno Biosciences outside the scope of this work. PDC is inventor on patent applications  
21  
22 469 dealing with the use of specific bacteria and components in the treatment of different diseases.  
23  
24 470 PDC was co-founder of The Akkermansia Company SA and of Enterosys S.A. JW has received  
25  
26 471 research funding and consulting fees from industry sources involved in the manufacture and  
27  
28 472 marketing of dietary fibers, prebiotics, and probiotics. JW is further a co-owner of Synbiotics  
29  
30 473 Health, a developer of synbiotic products. CMP reports receiving honoraria and/or paid  
31  
32 474 consultancy from Abbott Nutrition, Nutricia, Nestle Health Science, Fresenius Kabi, Pfizer,  
33  
34 475 and AMRA medical outside the scope of this work. Other authors declare no conflict of interest.  
35  
36  
37  
38  
39

40 476

## 41 42 477 **References**

- 43  
44  
45 478 1. World Health Organization. Obesity and overweight World Health Organization  
46  
47 479 website 2021 [Available from: [https://www.who.int/news-room/fact-sheets/detail/obesity-and-](https://www.who.int/news-room/fact-sheets/detail/obesity-and-overweight)  
48  
49 480 [overweight](https://www.who.int/news-room/fact-sheets/detail/obesity-and-overweight).  
50  
51 481 2. Furman D, Campisi J, Verdin E, Carrera-Bastos P, Targ S, Franceschi C, et al. Chronic  
52  
53 482 inflammation in the etiology of disease across the life span. Nature Medicine.  
54  
55 483 2019;25(12):1822-32.  
56  
57  
58  
59  
60

- 1  
2  
3 484 3. Monteiro R, Azevedo I. Chronic inflammation in obesity and the oetabolic syndrome.  
4  
5 485 Mediators of Inflammation. 2010;2010:1-10.  
6
- 7  
8 486 4. Karczewski J, Śledzińska E, Baturó A, Jończyk I, Maleszko A, Maleszko A, et al.  
9  
10 487 Obesity and inflammation. European Cytokine Network. 2018;29(3):83-94.  
11
- 12 488 5. Longo M, Zatterale F, Naderi J, Parrillo L, Formisano P, Raciti GA, et al. Adipose  
13  
14 489 tissue dysfunction as determinant of dbesity-associated metabolic complications. International  
15  
16 490 Journal of Molecular Sciences. 2019;20(9):2358.  
17
- 18  
19 491 6. Vallianou N, Stratigou T, Christodoulatos GS, Dalamaga M. Understanding the role of  
20  
21 492 the gut microbiome and microbial metabolites in obesity and obesity-associated metabolic  
22  
23 493 disorders: current evidence and perspectives. Current Obesity Reports. 2019;8(3):317-32.  
24
- 25  
26 494 7. Boulangé CL, Neves AL, Chilloux J, Nicholson JK, Dumas M-E. Impact of the gut  
27  
28 495 microbiota on inflammation, obesity, and metabolic disease. Genome Medicine. 2016;8(1).  
29
- 30  
31 496 8. Heymsfield SB, Van Mierlo CAJ, Van Der Knaap HCM, Heo M, Frier HI. Weight  
32  
33 497 management using a meal replacement strategy: meta and pooling analysis from six studies.  
34  
35 498 International Journal of Obesity. 2003;27(5):537-49.  
36
- 37  
38 499 9. Astbury NM, Piernas C, Hartmann-Boyce J, Lapworth S, Aveyard P, Jebb SA. A  
39  
40 500 systematic review and meta-analysis of the effectiveness of meal replacements for weight loss.  
41  
42 501 Obesity Reviews. 2019;20(4):569-87.  
43
- 44  
45 502 10. Kempf K, Schloot NC, Gartner B, Keil R, Schadewaldt P, Martin S. Meal replacement  
46  
47 503 reduces insulin requirement, HbA1c and weight long-term in type 2 diabetes patients with >100  
48  
49 504 U insulin per day. Journal of Human Nutrition and Dietetics. 2014;27 Suppl 2:21-7.  
50
- 51  
52 505 11. Halle M, Röhling M, Banzer W, Braumann KM, Kempf K, Mccarthy D, et al. Meal  
53  
54 506 replacement by formula diet reduces weight more than a lifestyle intervention alone in patients  
55  
56 507 with overweight or obesity and accompanied cardiovascular risk factors—the ACOORH trial.  
57  
58 508 European Journal of Clinical Nutrition. 2021;75(4):661-9.  
59  
60

- 1  
2  
3 509 12. Kempf K, Röhling M, Banzer W, Braumann KM, Halle M, McCarthy D, et al. High-  
4  
5 510 Protein, Low-Glycaemic Meal Replacement Decreases Fasting Insulin and Inflammation  
6  
7 511 Markers—A 12-Month Subanalysis of the ACOORH Trial. *Nutrients*. 2021;13(5):1433.  
8  
9  
10 512 13. Kolotkin RL, Andersen JR. A systematic review of reviews: exploring the relationship  
11  
12 513 between obesity, weight loss and health-related quality of life. *Clinical Obesity*. 2017;7(5):273-  
13  
14 514 89.  
15  
16  
17 515 14. Forsythe LK, Wallace JMW, Livingstone MBE. Obesity and inflammation: the effects  
18  
19 516 of weight loss. *Nutrition Research Reviews*. 2008;21(2):117-33.  
20  
21  
22 517 15. Case CC, Jones PH, Nelson K, O'Brian Smith E, Ballantyne CM. Impact of weight loss  
23  
24 518 on the metabolic syndrome. *Diabetes, Obesity and Metabolism*. 2002;4(6):407-14.  
25  
26  
27 519 16. Chan A-W, Tetzlaff JM, Altman DG, Laupacis A, Gøtzsche PC, Krleža-Jerić K, et al.  
28  
29 520 SPIRIT 2013 statement: defining standard protocol items for clinical trials. *Annals of internal*  
30  
31 521 *medicine*. 2013;158(3):200-7.  
32  
33  
34 522 17. Lohman TG, Roche AF, Martorell R. Anthropometric standardization reference  
35  
36 523 manual: Human kinetics books; 1988.  
37  
38  
39 524 18. Siervo M, Jebb SA. Body composition assessment: theory into practice: introduction of  
40  
41 525 multicompart ment models. *IEEE Engineering in Medicine and Biology Magazine*.  
42  
43 526 2010;29(1):48-59.  
44  
45  
46 527 19. Fosbøl MØ, Zerahn B. Contemporary methods of body composition measurement.  
47  
48 528 *Clinical Physiology and Functional Imaging*. 2015;35(2):81-97.  
49  
50  
51 529 20. Pearson TA, Mensah GA, Alexander RW, Anderson JL, Cannon RO, Criqui M, et al.  
52  
53 530 Markers of inflammation and cardiovascular disease. *Circulation*. 2003;107(3):499-511.  
54  
55  
56 531 21. Bolger AM, Lohse M, Usadel B. Trimmomatic: a flexible trimmer for Illumina  
57  
58 532 sequence data. *Bioinformatics*. 2014;30(15):2114-20.  
59  
60

- 1  
2  
3 533 22. Trapnell C, Roberts A, Goff L, Pertea G, Kim D, Kelley DR, et al. Differential gene  
4  
5 534 and transcript expression analysis of RNA-seq experiments with TopHat and Cufflinks. *Nature*  
6  
7 535 *Protocols*. 2012;7(3):562-78.
- 8  
9  
10 536 23. Morgan AP. argyle: An R Package for Analysis of Illumina Genotyping Arrays. *G3*  
11  
12 537 *Genes|Genomes|Genetics*. 2016;6(2):281-6.
- 13  
14  
15 538 24. Nguyen NK, Deehan EC, Zhang Z, Jin M, Baskota N, Perez-Muñoz ME, et al. Gut  
16  
17 539 microbiota modulation with long-chain corn bran arabinoxylan in adults with overweight and  
18  
19 540 obesity is linked to an individualized temporal increase in fecal propionate. *Microbiome*.  
20  
21 541 2020;8(1).
- 22  
23  
24 542 25. Godin G, Shephard R. A simple method to assess exercise behavior in the community.  
25  
26 543 *Canadian Journal of Applied Sport Sciences*. 1985;10(3):141-6.
- 27  
28 544 26. Shephard R. Godin leisure-time exercise questionnaire. *Medicine & Science in Sports*  
29  
30 545 *& Exercise*. 1997;29(6):S36-S8.
- 31  
32  
33 546 27. Godin G. The Godin-Shephard leisure-time physical activity questionnaire. *The Health*  
34  
35 547 *& Fitness Journal of Canada*. 2011;4(1):18-22.
- 36  
37  
38 548 28. National Cancer Institute. ASA24 Automated Self-Administered 24-Hour Recall,  
39  
40 549 *Epidemiology and Genomics Research Program, Division of Cancer Control and Population*  
41  
42 550 *Sciences 2015* [Available from: <http://epi.grants.cancer.gov/asa24/>].
- 43  
44  
45 551 29. Flint A, Raben A, Blundell J, Astrup A. Reproducibility, power and validity of visual  
46  
47 552 analogue scales in assessment of appetite sensations in single test meal studies. *International*  
48  
49 553 *Journal of Obesity*. 2000;24(1):38-48.
- 50  
51  
52 554 30. Mangano KM, Hutchins-Wiese HL, Kenny AM, Walsh SJ, Abourizk RH, Bruno RS,  
53  
54 555 et al. Soy proteins and isoflavones reduce interleukin-6 but not serum lipids in older women: a  
55  
56 556 randomized controlled trial. *Nutrition Research*. 2013;33(12):1026-33.
- 57  
58  
59  
60

- 1  
2  
3 557 31. Willett WC, Howe GR, Kushi LH. Adjustment for total energy intake in epidemiologic  
4  
5 558 studies. *The American Journal of Clinical Nutrition*. 1997;65(4):1220S-8S.  
6  
7  
8 559 32. Bolyen E, Rideout JR, Dillon MR, Bokulich NA, Abnet CC, Al-Ghalith GA, et al.  
9  
10 560 Reproducible, interactive, scalable and extensible microbiome data science using QIIME 2.  
11  
12 561 *Nature Biotechnology*. 2019;37(8):852-7.  
13  
14  
15 562 33. Callahan BJ, Mcmurdie PJ, Rosen MJ, Han AW, Johnson AJA, Holmes SP. DADA2:  
16  
17 563 High-resolution sample inference from Illumina amplicon data. *Nature Methods*.  
18  
19 564 2016;13(7):581-3.  
20  
21  
22 565 34. Pedregosa F, Varoquaux G, Gramfort A, Michel V, Thirion B, Grisel O, et al. Scikit-  
23  
24 566 learn: Machine learning in Python. *the Journal of machine Learning research*. 2011;12:2825-  
25  
26 567 30.  
27  
28  
29 568 35. Robeson MS, O'Rourke DR, Kaehler BD, Ziemski M, Dillon MR, Foster JT, et al.  
30  
31 569 RESCRIPT: Reproducible sequence taxonomy reference database management. *PLOS*  
32  
33 570 *Computational Biology*. 2021;17(11):e1009581.  
34  
35  
36 571 36. Mcmurdie PJ, Holmes S. phyloseq: An R Package for Reproducible Interactive  
37  
38 572 Analysis and Graphics of Microbiome Census Data. *PLoS ONE*. 2013;8(4):e61217.  
39  
40  
41 573 37. Lahti L, Shetty S, Turaga N, Obenchain V, Salojärvi J, Gilmore R. Tools for  
42  
43 574 microbiome analysis in R. Version. 2017.  
44  
45  
46 575 38. International Committee of medical Journal editors. Defining the Role of Authors and  
47  
48 576 Contributors 2017 [Available from: [https://www.icmje.org/recommendations/browse/roles-](https://www.icmje.org/recommendations/browse/roles-and-responsibilities/defining-the-role-of-authors-and-contributors.html)  
49  
50 577 [and-responsibilities/defining-the-role-of-authors-and-contributors.html](https://www.icmje.org/recommendations/browse/roles-and-responsibilities/defining-the-role-of-authors-and-contributors.html).  
51  
52  
53  
54  
55  
56  
57  
58  
59  
60

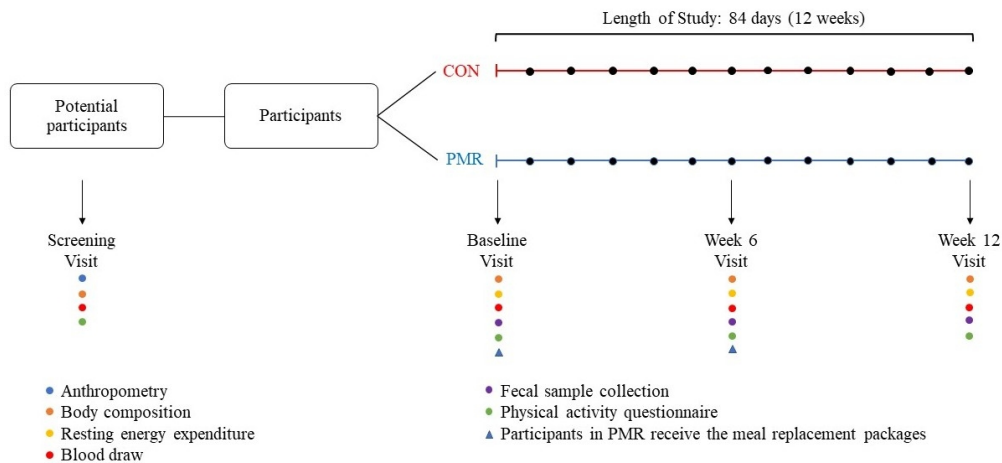

Figure 1. Experimental protocol. Abbreviations: CON control group, PMR powdered meal replacement group.

315x148mm (96 x 96 DPI)

| TIMEPOINT      |                                  | STUDY PERIOD    |                |                  |                  |                   |        |
|----------------|----------------------------------|-----------------|----------------|------------------|------------------|-------------------|--------|
|                |                                  | Enrollment      | Allocation     | Post-Allocation  |                  |                   |        |
|                |                                  | Screening visit | Post-screening | Visit 1 (week 1) | Visit 2 (week 6) | Visit 3 (week 12) | Weekly |
| ENROLLMENT     | Eligibility screen               | X               |                |                  |                  |                   |        |
|                | Informed consent                 | X               |                |                  |                  |                   |        |
|                | Anthropometry                    | X               |                |                  |                  |                   |        |
|                | Body composition                 | X               |                |                  |                  |                   |        |
|                | Blood tests                      | X               |                |                  |                  |                   |        |
|                | Questionnaires                   | X               |                |                  |                  |                   |        |
|                | Allocation                       |                 | X              |                  |                  |                   |        |
| INTERVENTIONS  | CON                              |                 |                | ●                | ●                |                   |        |
|                | PMR                              |                 |                | ●                | ●                |                   |        |
| ASSESSMENTS    | Gut microbiome                   |                 |                | X                | X                | X                 |        |
|                | Systemic inflammatory biomarkers |                 |                | X                | X                | X                 |        |
|                | Metabolic blood markers          |                 |                | X                | X                | X                 |        |
|                | Gene expression                  |                 |                | X                |                  | X                 |        |
|                | Gene polymorphisms               |                 |                | X                |                  |                   |        |
|                | Energy metabolism                |                 |                | X                | X                | X                 |        |
|                | Body composition                 |                 |                | X                | X                | X                 |        |
|                | Appetite sensation               |                 |                |                  |                  |                   | X      |
|                | Physical activity questionnaire  |                 |                | X                | X                | X                 |        |
| Dietary intake |                                  |                 |                |                  |                  | X                 |        |

Figure 2. Schedule of enrollment, interventions, and assessments (SPIRIT figure). Abbreviations: CON control group, PMR powdered meal replacement group.

205x139mm (150 x 150 DPI)

# Reporting checklist for protocol of a clinical trial.

Based on the SPIRIT guidelines.

## Instructions to authors

Complete this checklist by entering the page numbers from your manuscript where readers will find each of the items listed below.

Your article may not currently address all the items on the checklist. Please modify your text to include the missing information. If you are certain that an item does not apply, please write "n/a" and provide a short explanation.

Upload your completed checklist as an extra file when you submit to a journal.

In your methods section, say that you used the SPIRIT reporting guidelines, and cite them as:

Chan A-W, Tetzlaff JM, Gøtzsche PC, Altman DG, Mann H, Berlin J, Dickersin K, Hróbjartsson A, Schulz KF, Parulekar WR, Krleža-Jerić K, Laupacis A, Moher D. SPIRIT 2013 Explanation and Elaboration: Guidance for protocols of clinical trials. *BMJ*. 2013;346:e7586

|                                             |                     | Reporting Item                                                                                               | Page Number |
|---------------------------------------------|---------------------|--------------------------------------------------------------------------------------------------------------|-------------|
| <b>Administrative information</b>           |                     |                                                                                                              |             |
| Title                                       | <a href="#">#1</a>  | Descriptive title identifying the study design, population, interventions, and, if applicable, trial acronym | 1           |
| Trial registration                          | <a href="#">#2a</a> | Trial identifier and registry name. If not yet registered, name of intended registry                         | 2, 6, 17    |
| Trial registration: data set                | <a href="#">#2b</a> | All items from the World Health Organization Trial Registration Data Set                                     | 6           |
| Protocol version                            | <a href="#">#3</a>  | Date and version identifier                                                                                  | 2, 5, 17    |
| Funding                                     | <a href="#">#4</a>  | Sources and types of financial, material, and other support                                                  | 18-19       |
| Roles and responsibilities: contributorship | <a href="#">#5a</a> | Names, affiliations, and roles of protocol contributors                                                      | 1, 18       |



|    |                           |                     |                                                                      |     |
|----|---------------------------|---------------------|----------------------------------------------------------------------|-----|
| 1  | Roles and                 | <a href="#">#5b</a> | Name and contact information for the trial sponsor                   | 18  |
| 2  | responsibilities:         |                     |                                                                      |     |
| 3  | sponsor contact           |                     |                                                                      |     |
| 4  | information               |                     |                                                                      |     |
| 5  |                           |                     |                                                                      |     |
| 6  |                           |                     |                                                                      |     |
| 7  |                           |                     |                                                                      |     |
| 8  | Roles and                 | <a href="#">#5c</a> | Role of study sponsor and funders, if any, in study design;          | 18  |
| 9  | responsibilities:         |                     | collection, management, analysis, and interpretation of data;        |     |
| 10 | sponsor and funder        |                     | writing of the report; and the decision to submit the report for     |     |
| 11 |                           |                     | publication, including whether they will have ultimate authority     |     |
| 12 |                           |                     | over any of these activities                                         |     |
| 13 |                           |                     |                                                                      |     |
| 14 |                           |                     |                                                                      |     |
| 15 |                           |                     |                                                                      |     |
| 16 | Roles and                 | <a href="#">#5d</a> | Composition, roles, and responsibilities of the coordinating centre, | 18  |
| 17 | responsibilities:         |                     | steering committee, endpoint adjudication committee, data            |     |
| 18 | committees                |                     | management team, and other individuals or groups overseeing the      |     |
| 19 |                           |                     | trial, if applicable (see Item 21a for data monitoring committee)    |     |
| 20 |                           |                     |                                                                      |     |
| 21 |                           |                     |                                                                      |     |
| 22 |                           |                     |                                                                      |     |
| 23 | <b>Introduction</b>       |                     |                                                                      |     |
| 24 |                           |                     |                                                                      |     |
| 25 | Background and            | <a href="#">#6a</a> | Description of research question and justification for undertaking   | 4-5 |
| 26 | rationale                 |                     | the trial, including summary of relevant studies (published and      |     |
| 27 |                           |                     | unpublished) examining benefits and harms for each intervention      |     |
| 28 |                           |                     |                                                                      |     |
| 29 |                           |                     |                                                                      |     |
| 30 | Background and            | <a href="#">#6b</a> | Explanation for choice of comparators                                | 5   |
| 31 | rationale: choice of      |                     |                                                                      |     |
| 32 | comparators               |                     |                                                                      |     |
| 33 |                           |                     |                                                                      |     |
| 34 |                           |                     |                                                                      |     |
| 35 |                           |                     |                                                                      |     |
| 36 | Objectives                | <a href="#">#7</a>  | Specific objectives or hypotheses                                    | 5   |
| 37 |                           |                     |                                                                      |     |
| 38 | Trial design              | <a href="#">#8</a>  | Description of trial design including type of trial (eg, parallel    | 5-6 |
| 39 |                           |                     | group, crossover, factorial, single group), allocation ratio, and    |     |
| 40 |                           |                     | framework (eg, superiority, equivalence, non-inferiority,            |     |
| 41 |                           |                     | exploratory)                                                         |     |
| 42 |                           |                     |                                                                      |     |
| 43 |                           |                     |                                                                      |     |
| 44 |                           |                     |                                                                      |     |
| 45 | <b>Methods:</b>           |                     |                                                                      |     |
| 46 | <b>Participants,</b>      |                     |                                                                      |     |
| 47 | <b>interventions, and</b> |                     |                                                                      |     |
| 48 | <b>outcomes</b>           |                     |                                                                      |     |
| 49 |                           |                     |                                                                      |     |
| 50 |                           |                     |                                                                      |     |
| 51 | Study setting             | <a href="#">#9</a>  | Description of study settings (eg, community clinic, academic        | 5   |
| 52 |                           |                     | hospital) and list of countries where data will be collected.        |     |
| 53 |                           |                     | Reference to where list of study sites can be obtained               |     |
| 54 |                           |                     |                                                                      |     |
| 55 |                           |                     |                                                                      |     |
| 56 |                           |                     |                                                                      |     |
| 57 | Eligibility criteria      | <a href="#">#10</a> | Inclusion and exclusion criteria for participants. If applicable,    | 7   |
| 58 |                           |                     | eligibility criteria for study centres and individuals who will      |     |
| 59 |                           |                     |                                                                      |     |
| 60 |                           |                     |                                                                      |     |

|    |                              |                                                                                            |     |
|----|------------------------------|--------------------------------------------------------------------------------------------|-----|
|    |                              | perform the interventions (eg, surgeons, psychotherapists)                                 |     |
| 1  |                              |                                                                                            |     |
| 2  | Interventions:               | <a href="#">#11a</a> Interventions for each group with sufficient detail to allow          | 8   |
| 3  | description                  | replication, including how and when they will be administered                              |     |
| 4  |                              |                                                                                            |     |
| 5  | Interventions:               | <a href="#">#11b</a> Criteria for discontinuing or modifying allocated interventions for a | 15  |
| 6  | modifications                | given trial participant (eg, drug dose change in response to harms,                        |     |
| 7  |                              | participant request, or improving / worsening disease)                                     |     |
| 8  |                              |                                                                                            |     |
| 9  | Interventions:               | <a href="#">#11c</a> Strategies to improve adherence to intervention protocols, and any    | 15  |
| 10 | adherence                    | procedures for monitoring adherence (eg, drug tablet return;                               |     |
| 11 |                              | laboratory tests)                                                                          |     |
| 12 | Interventions:               | <a href="#">#11d</a> Relevant concomitant care and interventions that are permitted or     | 15  |
| 13 | concomitant care             | prohibited during the trial                                                                |     |
| 14 |                              |                                                                                            |     |
| 15 | Outcomes                     | <a href="#">#12</a> Primary, secondary, and other outcomes, including the specific         | 6-7 |
| 16 |                              | measurement variable (eg, systolic blood pressure), analysis metric                        |     |
| 17 |                              | (eg, change from baseline, final value, time to event), method of                          |     |
| 18 |                              | aggregation (eg, median, proportion), and time point for each                              |     |
| 19 |                              | outcome. Explanation of the clinical relevance of chosen efficacy                          |     |
| 20 |                              | and harm outcomes is strongly recommended                                                  |     |
| 21 | Participant timeline         | <a href="#">#13</a> Time schedule of enrolment, interventions (including any run-ins       | 8-9 |
| 22 |                              | and washouts), assessments, and visits for participants. A                                 |     |
| 23 |                              | schematic diagram is highly recommended (see Figure)                                       |     |
| 24 |                              |                                                                                            |     |
| 25 | Sample size                  | <a href="#">#14</a> Estimated number of participants needed to achieve study               | 15  |
| 26 |                              | objectives and how it was determined, including clinical and                               |     |
| 27 |                              | statistical assumptions supporting any sample size calculations                            |     |
| 28 |                              |                                                                                            |     |
| 29 | Recruitment                  | <a href="#">#15</a> Strategies for achieving adequate participant enrolment to reach       | 8   |
| 30 |                              | target sample size                                                                         |     |
| 31 |                              |                                                                                            |     |
| 32 |                              |                                                                                            |     |
| 33 |                              |                                                                                            |     |
| 34 |                              |                                                                                            |     |
| 35 |                              |                                                                                            |     |
| 36 |                              |                                                                                            |     |
| 37 |                              |                                                                                            |     |
| 38 |                              |                                                                                            |     |
| 39 |                              |                                                                                            |     |
| 40 |                              |                                                                                            |     |
| 41 |                              |                                                                                            |     |
| 42 |                              |                                                                                            |     |
| 43 |                              |                                                                                            |     |
| 44 |                              |                                                                                            |     |
| 45 | <b>Methods: Assignment</b>   |                                                                                            |     |
| 46 | <b>of interventions (for</b> |                                                                                            |     |
| 47 | <b>controlled trials)</b>    |                                                                                            |     |
| 48 |                              |                                                                                            |     |
| 49 |                              |                                                                                            |     |
| 50 | Allocation: sequence         | <a href="#">#16a</a> Method of generating the allocation sequence (eg, computer-           | 8   |
| 51 | generation                   | generated random numbers), and list of any factors for                                     |     |
| 52 |                              | stratification. To reduce predictability of a random sequence,                             |     |
| 53 |                              | details of any planned restriction (eg, blocking) should be provided                       |     |
| 54 |                              | in a separate document that is unavailable to those who enrol                              |     |
| 55 |                              | participants or assign interventions                                                       |     |
| 56 |                              |                                                                                            |     |
| 57 |                              |                                                                                            |     |
| 58 |                              |                                                                                            |     |
| 59 |                              |                                                                                            |     |
| 60 |                              |                                                                                            |     |

|    |                        |                      |                                                                       |       |
|----|------------------------|----------------------|-----------------------------------------------------------------------|-------|
| 1  | Allocation concealment | <a href="#">#16b</a> | Mechanism of implementing the allocation sequence (eg, central        | 8     |
| 2  | mechanism              |                      | telephone; sequentially numbered, opaque, sealed envelopes),          |       |
| 3  |                        |                      | describing any steps to conceal the sequence until interventions are  |       |
| 4  |                        |                      | assigned                                                              |       |
| 5  |                        |                      |                                                                       |       |
| 6  |                        |                      |                                                                       |       |
| 7  |                        |                      |                                                                       |       |
| 8  | Allocation:            | <a href="#">#16c</a> | Who will generate the allocation sequence, who will enrol             | 17-18 |
| 9  | implementation         |                      | participants, and who will assign participants to interventions       |       |
| 10 |                        |                      |                                                                       |       |
| 11 | Blinding (masking)     | <a href="#">#17a</a> | Who will be blinded after assignment to interventions (eg, trial      | 3     |
| 12 |                        |                      | participants, care providers, outcome assessors, data analysts), and  |       |
| 13 |                        |                      | how                                                                   |       |
| 14 |                        |                      |                                                                       |       |
| 15 |                        |                      |                                                                       |       |
| 16 |                        |                      |                                                                       |       |
| 17 | Blinding (masking):    | <a href="#">#17b</a> | If blinded, circumstances under which unblinding is permissible,      | n/a   |
| 18 | emergency unblinding   |                      | and procedure for revealing a participant's allocated intervention    |       |
| 19 |                        |                      | during the trial                                                      |       |
| 20 |                        |                      |                                                                       |       |
| 21 |                        |                      |                                                                       |       |
| 22 | <b>Methods: Data</b>   |                      |                                                                       |       |
| 23 | <b>collection,</b>     |                      |                                                                       |       |
| 24 | <b>management, and</b> |                      |                                                                       |       |
| 25 | <b>analysis</b>        |                      |                                                                       |       |
| 26 |                        |                      |                                                                       |       |
| 27 |                        |                      |                                                                       |       |
| 28 |                        |                      |                                                                       |       |
| 29 | Data collection plan   | <a href="#">#18a</a> | Plans for assessment and collection of outcome, baseline, and other   | 8-15  |
| 30 |                        |                      | trial data, including any related processes to promote data quality   |       |
| 31 |                        |                      | (eg, duplicate measurements, training of assessors) and a             |       |
| 32 |                        |                      | description of study instruments (eg, questionnaires, laboratory      |       |
| 33 |                        |                      | tests) along with their reliability and validity, if known. Reference |       |
| 34 |                        |                      | to where data collection forms can be found, if not in the protocol   |       |
| 35 |                        |                      |                                                                       |       |
| 36 |                        |                      |                                                                       |       |
| 37 |                        |                      |                                                                       |       |
| 38 |                        |                      |                                                                       |       |
| 39 | Data collection plan:  | <a href="#">#18b</a> | Plans to promote participant retention and complete follow-up,        | 9/ 15 |
| 40 | retention              |                      | including list of any outcome data to be collected for participants   |       |
| 41 |                        |                      | who discontinue or deviate from intervention protocols                |       |
| 42 |                        |                      |                                                                       |       |
| 43 |                        |                      |                                                                       |       |
| 44 | Data management        | <a href="#">#19</a>  | Plans for data entry, coding, security, and storage, including any    | 17-18 |
| 45 |                        |                      | related processes to promote data quality (eg, double data entry;     |       |
| 46 |                        |                      | range checks for data values). Reference to where details of data     |       |
| 47 |                        |                      | management procedures can be found, if not in the protocol            |       |
| 48 |                        |                      |                                                                       |       |
| 49 |                        |                      |                                                                       |       |
| 50 |                        |                      |                                                                       |       |
| 51 | Statistics: outcomes   | <a href="#">#20a</a> | Statistical methods for analysing primary and secondary outcomes.     | 15-17 |
| 52 |                        |                      | Reference to where other details of the statistical analysis plan can |       |
| 53 |                        |                      | be found, if not in the protocol                                      |       |
| 54 |                        |                      |                                                                       |       |
| 55 |                        |                      |                                                                       |       |
| 56 | Statistics: additional | <a href="#">#20b</a> | Methods for any additional analyses (eg, subgroup and adjusted        | n/a   |
| 57 | analyses               |                      | analyses)                                                             |       |
| 58 |                        |                      |                                                                       |       |
| 59 |                        |                      |                                                                       |       |
| 60 |                        |                      |                                                                       |       |

|    |                            |                      |                                                                         |       |
|----|----------------------------|----------------------|-------------------------------------------------------------------------|-------|
| 1  | Statistics: analysis       | <a href="#">#20c</a> | Definition of analysis population relating to protocol non-             | 16-17 |
| 2  | population and missing     |                      | adherence (eg, as randomised analysis), and any statistical methods     |       |
| 3  | data                       |                      | to handle missing data (eg, multiple imputation)                        |       |
| 4  |                            |                      |                                                                         |       |
| 5  |                            |                      |                                                                         |       |
| 6  | <b>Methods: Monitoring</b> |                      |                                                                         |       |
| 7  |                            |                      |                                                                         |       |
| 8  | Data monitoring:           | <a href="#">#21a</a> | Composition of data monitoring committee (DMC); summary of its          | 18    |
| 9  | formal committee           |                      | role and reporting structure; statement of whether it is independent    |       |
| 10 |                            |                      | from the sponsor and competing interests; and reference to where        |       |
| 11 |                            |                      | further details about its charter can be found, if not in the protocol. |       |
| 12 |                            |                      | Alternatively, an explanation of why a DMC is not needed                |       |
| 13 |                            |                      |                                                                         |       |
| 14 | Data monitoring:           | <a href="#">#21b</a> | Description of any interim analyses and stopping guidelines,            | 17-18 |
| 15 | interim analysis           |                      | including who will have access to these interim results and make        |       |
| 16 |                            |                      | the final decision to terminate the trial                               |       |
| 17 |                            |                      |                                                                         |       |
| 18 |                            |                      |                                                                         |       |
| 19 |                            |                      |                                                                         |       |
| 20 |                            |                      |                                                                         |       |
| 21 |                            |                      |                                                                         |       |
| 22 | Harms                      | <a href="#">#22</a>  | Plans for collecting, assessing, reporting, and managing solicited      | 9     |
| 23 |                            |                      | and spontaneously reported adverse events and other unintended          |       |
| 24 |                            |                      | effects of trial interventions or trial conduct                         |       |
| 25 |                            |                      |                                                                         |       |
| 26 |                            |                      |                                                                         |       |
| 27 | Auditing                   | <a href="#">#23</a>  | Frequency and procedures for auditing trial conduct, if any, and        | 18    |
| 28 |                            |                      | whether the process will be independent from investigators and the      |       |
| 29 |                            |                      | sponsor                                                                 |       |
| 30 |                            |                      |                                                                         |       |
| 31 |                            |                      |                                                                         |       |
| 32 |                            |                      |                                                                         |       |
| 33 | <b>Ethics and</b>          |                      |                                                                         |       |
| 34 | <b>dissemination</b>       |                      |                                                                         |       |
| 35 |                            |                      |                                                                         |       |
| 36 |                            |                      |                                                                         |       |
| 37 | Research ethics            | <a href="#">#24</a>  | Plans for seeking research ethics committee / institutional review      | 17-18 |
| 38 | approval                   |                      | board (REC / IRB) approval                                              |       |
| 39 |                            |                      |                                                                         |       |
| 40 |                            |                      |                                                                         |       |
| 41 | Protocol amendments        | <a href="#">#25</a>  | Plans for communicating important protocol modifications (eg,           | 17    |
| 42 |                            |                      | changes to eligibility criteria, outcomes, analyses) to relevant        |       |
| 43 |                            |                      | parties (eg, investigators, REC / IRBs, trial participants, trial       |       |
| 44 |                            |                      | registries, journals, regulators)                                       |       |
| 45 |                            |                      |                                                                         |       |
| 46 |                            |                      |                                                                         |       |
| 47 | Consent or assent          | <a href="#">#26a</a> | Who will obtain informed consent or assent from potential trial         | 5-6   |
| 48 |                            |                      | participants or authorised surrogates, and how (see Item 32)            |       |
| 49 |                            |                      |                                                                         |       |
| 50 |                            |                      |                                                                         |       |
| 51 | Consent or assent:         | <a href="#">#26b</a> | Additional consent provisions for collection and use of participant     | n/a   |
| 52 | ancillary studies          |                      | data and biological specimens in ancillary studies, if applicable       |       |
| 53 |                            |                      |                                                                         |       |
| 54 |                            |                      |                                                                         |       |
| 55 | Confidentiality            | <a href="#">#27</a>  | How personal information about potential and enrolled participants      | 17-18 |
| 56 |                            |                      | will be collected, shared, and maintained in order to protect           |       |
| 57 |                            |                      | confidentiality before, during, and after the trial                     |       |
| 58 |                            |                      |                                                                         |       |
| 59 |                            |                      |                                                                         |       |
| 60 |                            |                      |                                                                         |       |

|    |                                             |                      |                                                                                                                                                                                                                                                                                     |       |
|----|---------------------------------------------|----------------------|-------------------------------------------------------------------------------------------------------------------------------------------------------------------------------------------------------------------------------------------------------------------------------------|-------|
| 1  | Declaration of interests                    | <a href="#">#28</a>  | Financial and other competing interests for principal investigators for the overall trial and each study site                                                                                                                                                                       | 19    |
| 2  |                                             |                      |                                                                                                                                                                                                                                                                                     |       |
| 3  |                                             |                      |                                                                                                                                                                                                                                                                                     |       |
| 4  |                                             |                      |                                                                                                                                                                                                                                                                                     |       |
| 5  | Data access                                 | <a href="#">#29</a>  | Statement of who will have access to the final trial dataset, and disclosure of contractual agreements that limit such access for investigators                                                                                                                                     | 17-19 |
| 6  |                                             |                      |                                                                                                                                                                                                                                                                                     |       |
| 7  |                                             |                      |                                                                                                                                                                                                                                                                                     |       |
| 8  |                                             |                      |                                                                                                                                                                                                                                                                                     |       |
| 9  |                                             |                      |                                                                                                                                                                                                                                                                                     |       |
| 10 | Ancillary and post trial care               | <a href="#">#30</a>  | Provisions, if any, for ancillary and post-trial care, and for compensation to those who suffer harm from trial participation                                                                                                                                                       | n/a   |
| 11 |                                             |                      |                                                                                                                                                                                                                                                                                     |       |
| 12 |                                             |                      |                                                                                                                                                                                                                                                                                     |       |
| 13 |                                             |                      |                                                                                                                                                                                                                                                                                     |       |
| 14 | Dissemination policy: trial results         | <a href="#">#31a</a> | Plans for investigators and sponsor to communicate trial results to participants, healthcare professionals, the public, and other relevant groups (eg, via publication, reporting in results databases, or other data sharing arrangements), including any publication restrictions | 17-18 |
| 15 |                                             |                      |                                                                                                                                                                                                                                                                                     |       |
| 16 |                                             |                      |                                                                                                                                                                                                                                                                                     |       |
| 17 |                                             |                      |                                                                                                                                                                                                                                                                                     |       |
| 18 |                                             |                      |                                                                                                                                                                                                                                                                                     |       |
| 19 |                                             |                      |                                                                                                                                                                                                                                                                                     |       |
| 20 |                                             |                      |                                                                                                                                                                                                                                                                                     |       |
| 21 | Dissemination policy: authorship            | <a href="#">#31b</a> | Authorship eligibility guidelines and any intended use of professional writers                                                                                                                                                                                                      | 18    |
| 22 |                                             |                      |                                                                                                                                                                                                                                                                                     |       |
| 23 |                                             |                      |                                                                                                                                                                                                                                                                                     |       |
| 24 | Dissemination policy: reproducible research | <a href="#">#31c</a> | Plans, if any, for granting public access to the full protocol, participant-level dataset, and statistical code                                                                                                                                                                     | n/a   |
| 25 |                                             |                      |                                                                                                                                                                                                                                                                                     |       |
| 26 |                                             |                      |                                                                                                                                                                                                                                                                                     |       |
| 27 |                                             |                      |                                                                                                                                                                                                                                                                                     |       |
| 28 | <b>Appendices</b>                           |                      |                                                                                                                                                                                                                                                                                     |       |
| 29 |                                             |                      |                                                                                                                                                                                                                                                                                     |       |
| 30 |                                             |                      |                                                                                                                                                                                                                                                                                     |       |
| 31 | Informed consent materials                  | <a href="#">#32</a>  | Model consent form and other related documentation given to participants and authorised surrogates                                                                                                                                                                                  | n/a   |
| 32 |                                             |                      |                                                                                                                                                                                                                                                                                     |       |
| 33 |                                             |                      |                                                                                                                                                                                                                                                                                     |       |
| 34 |                                             |                      |                                                                                                                                                                                                                                                                                     |       |
| 35 | Biological specimens                        | <a href="#">#33</a>  | Plans for collection, laboratory evaluation, and storage of biological specimens for genetic or molecular analysis in the current trial and for future use in ancillary studies, if applicable                                                                                      | 11-13 |
| 36 |                                             |                      |                                                                                                                                                                                                                                                                                     |       |
| 37 |                                             |                      |                                                                                                                                                                                                                                                                                     |       |
| 38 |                                             |                      |                                                                                                                                                                                                                                                                                     |       |
| 39 |                                             |                      |                                                                                                                                                                                                                                                                                     |       |

40 The SPIRIT Explanation and Elaboration paper is distributed under the terms of the Creative Commons  
 41 Attribution License CC-BY-NC. This checklist was completed on 09. November 2022 using  
 42 <https://www.goodreports.org/>, a tool made by the [EQUATOR Network](#) in collaboration with [Penelope.ai](#)  
 43  
 44  
 45  
 46  
 47  
 48  
 49  
 50  
 51  
 52  
 53  
 54  
 55  
 56  
 57  
 58  
 59

# BMJ Open

## The Impact of a Powdered Meal Replacement on Metabolism and Gut Microbiota (PREMIUM) in Individuals with Excessive Body Weight: A Study Protocol for a Randomized Controlled Trial

|                                 |                                                                                                                                                                                                                                                                                                                                                                                                                                                                                                                                                                                                                                                                                                                                                                                                                                                                                                                                                                                                                                                                                                                                                                                                                                                                                                                                                                                                                        |
|---------------------------------|------------------------------------------------------------------------------------------------------------------------------------------------------------------------------------------------------------------------------------------------------------------------------------------------------------------------------------------------------------------------------------------------------------------------------------------------------------------------------------------------------------------------------------------------------------------------------------------------------------------------------------------------------------------------------------------------------------------------------------------------------------------------------------------------------------------------------------------------------------------------------------------------------------------------------------------------------------------------------------------------------------------------------------------------------------------------------------------------------------------------------------------------------------------------------------------------------------------------------------------------------------------------------------------------------------------------------------------------------------------------------------------------------------------------|
| Journal:                        | <i>BMJ Open</i>                                                                                                                                                                                                                                                                                                                                                                                                                                                                                                                                                                                                                                                                                                                                                                                                                                                                                                                                                                                                                                                                                                                                                                                                                                                                                                                                                                                                        |
| Manuscript ID                   | bmjopen-2022-070027.R1                                                                                                                                                                                                                                                                                                                                                                                                                                                                                                                                                                                                                                                                                                                                                                                                                                                                                                                                                                                                                                                                                                                                                                                                                                                                                                                                                                                                 |
| Article Type:                   | Protocol                                                                                                                                                                                                                                                                                                                                                                                                                                                                                                                                                                                                                                                                                                                                                                                                                                                                                                                                                                                                                                                                                                                                                                                                                                                                                                                                                                                                               |
| Date Submitted by the Author:   | 24-May-2023                                                                                                                                                                                                                                                                                                                                                                                                                                                                                                                                                                                                                                                                                                                                                                                                                                                                                                                                                                                                                                                                                                                                                                                                                                                                                                                                                                                                            |
| Complete List of Authors:       | Montenegro, Julia; University of Alberta, Department of Agricultural, Food, and Nutritional Science<br>L. P. Oliveira, Camila ; University of Alberta, Department of Agricultural, Food and Nutritional Science<br>Armet, Anissa M.; University of Alberta, Department of Agricultural, Food and Nutritional Science<br>Berg, Aloys; University of Freiburg, Faculty of Medicine<br>Sharma, Arya; University of Alberta, Department of Medicine<br>Mereu, Laurie; University of Alberta, Department of Medicine<br>Cominetti, Cristiane; Universidade Federal de Goias, Faculdade de Nutrição<br>Ghosh, Sunita; University of Alberta, Department of Oncology<br>Richard, Caroline; University of Alberta, Department of Agricultural, Food and Nutritional Science<br>Nguyen, Nguyen ; Universite catholique de Louvain, Metabolism and Nutrition research group (MNUT); Walloon Excellence in Lifesciences and Biotechnology, WELBIO department<br>Cani, Patrice; Universite catholique de Louvain, Metabolism and Nutrition research group (MNUT); Walloon Excellence in Lifesciences and Biotechnology, WELBIO department<br>Walter, Jens; University of Alberta, Department of Agricultural, Food and Nutritional Science; University College Cork, APC Microbiome Ireland, School of Microbiology, and Department of Medicine<br>Prado, Carla; University of Alberta, Agricultural Food and Nutritional Sciences |
| <b>Primary Subject Heading</b>: | Nutrition and metabolism                                                                                                                                                                                                                                                                                                                                                                                                                                                                                                                                                                                                                                                                                                                                                                                                                                                                                                                                                                                                                                                                                                                                                                                                                                                                                                                                                                                               |
| Secondary Subject Heading:      | Genetics and genomics, Immunology (including allergy), Research methods                                                                                                                                                                                                                                                                                                                                                                                                                                                                                                                                                                                                                                                                                                                                                                                                                                                                                                                                                                                                                                                                                                                                                                                                                                                                                                                                                |
| Keywords:                       | NUTRITION & DIETETICS, MICROBIOLOGY, IMMUNOLOGY, Obesity                                                                                                                                                                                                                                                                                                                                                                                                                                                                                                                                                                                                                                                                                                                                                                                                                                                                                                                                                                                                                                                                                                                                                                                                                                                                                                                                                               |
|                                 |                                                                                                                                                                                                                                                                                                                                                                                                                                                                                                                                                                                                                                                                                                                                                                                                                                                                                                                                                                                                                                                                                                                                                                                                                                                                                                                                                                                                                        |

1  
2  
3  
4  
5  
6  
7  
8  
9  
10  
11  
12  
13  
14  
15  
16  
17  
18  
19  
20  
21  
22  
23  
24  
25  
26  
27  
28  
29  
30  
31  
32  
33  
34  
35  
36  
37  
38  
39  
40  
41  
42  
43  
44  
45  
46  
47  
48  
49  
50  
51  
52  
53  
54  
55  
56  
57  
58  
59  
60

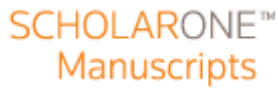

1  
2  
3 1 **The Impact of a Powdered Meal Replacement on Metabolism and Gut Microbiota**  
4  
5 2 **(PREMIUM) in Individuals with Excessive Body Weight: A Study Protocol for a**  
6  
7 3 **Randomized Controlled Trial**  
8  
9

10 4 Julia Montenegro<sup>1\*</sup>, Camila L. P. Oliveira<sup>1\*</sup>, Anissa M. Armet<sup>1</sup>, Aloys Berg<sup>2</sup>, Arya M.  
11  
12 5 Sharma<sup>3</sup>, Laurie Mereu<sup>3</sup>, Cristiane Cominetti<sup>4</sup>, Sunita Ghosh<sup>5</sup>, Caroline Richard<sup>1</sup>, Nguyen K.  
13  
14 6 Nguyen<sup>6,7</sup>, Patrice D. Cani<sup>6,7</sup>, Jens Walter<sup>1,8\*</sup>, Carla M. Prado<sup>1\*</sup>  
15  
16  
17  
18 7

19  
20 8 <sup>1</sup>Department of Agricultural, Food and Nutritional Science, University of Alberta, Edmonton,  
21  
22 9 AB, Canada.

23  
24 10 <sup>2</sup>Faculty of Medicine, University of Freiburg, Freiburg, Germany.

25  
26 11 <sup>3</sup>Department of Medicine, University of Alberta, Edmonton, AB, Canada.

27  
28 12 <sup>4</sup>Faculty of Nutrition, Federal University of Goiás, Goiânia, GO, Brazil.

29  
30 13 <sup>5</sup>Department of Medical Oncology, University of Alberta, Edmonton, AB, Canada.

31  
32 14 <sup>6</sup>Metabolism and Nutrition research group (MNUT), UCLouvain, Université catholique de  
33  
34 15 Louvain, Louvain Drug Research Institute, 1200 Brussels, Belgium

35  
36 16 <sup>7</sup>Walloon Excellence in Life Sciences and BIOTEchnology (WELBIO), WELBIO department,  
37  
38 17 WEL Research Institute, avenue Pasteur, 6, 1300 Wavre, Belgium

39  
40 18 <sup>8</sup>APC Microbiome Ireland, School of Microbiology, and Department of Medicine, University  
41  
42 19 College Cork – National University of Ireland, Cork, Ireland.

43  
44 20 \* Authors contributed equally.

45  
46 21 \* Co-corresponding authors: carla.prado@ualberta.ca and jenswalter@ucc.ie.  
47  
48  
49  
50  
51  
52  
53  
54  
55  
56  
57  
58  
59  
60



**22 ABSTRACT**

23 *Introduction:* Excess body weight is associated with a state of low-grade chronic inflammation  
24 and alterations of the gut microbiome. Powdered meal replacements (PMR) have been shown  
25 to be an effective strategy for weight management; however, their effect on inflammation and  
26 the gut microbiome remains unclear. The aim of this 12-week randomized control clinical trial  
27 is to investigate the effects of PMR consumption, here given as a soy-yogurt-honey formula,  
28 on inflammation, gut microbiome, and overall metabolism in individuals with excessive body  
29 weight.

30 *Methods and analysis:* Healthy adults with excess body weight (n=88) are being recruited and  
31 randomly assigned to one of the following groups: a) Control group (CON): maintaining usual  
32 diet for 12 weeks, or b) PMR group: replacing morning and afternoon snacks daily with a PMR  
33 for 12 weeks. Participants are asked to maintain body weight throughout the study and fill out  
34 a journal with information about PMR consumption, body weight, food intake, appetite  
35 sensations, and medications. Three study visits are required: baseline, week 6, and week 12.  
36 Outcome measures include systemic inflammatory biomarkers, gut microbiome composition,  
37 metabolic blood markers, host energy metabolism, body composition, appetite sensations, and  
38 host gene expression profile.

39 *Ethics and dissemination:* This research protocol was approved by the University of Alberta  
40 Ethics Board (Pro00070712) and adheres to the Canadian Tri-Council Policy statement on the  
41 use of human participants in research. Procedures and potential risks are fully discussed with  
42 participants. Study findings will be disseminated in peer-reviewed journals, conference  
43 presentations, and social media.

44 *Registration details:* ClinicalTrials.gov identifier: NCT03235804.

46 **Keywords:** Powdered meal replacement; obesity; inflammation; gut microbiome.

1  
2  
3 47  
45  
6 48 **ARTICLE SUMMARY**7  
8 49 **Strengths and Limitations of this study**

- 9
- 10 50 • The randomized controlled clinical trial design, coupled with regular assessments and
- 11 follow-up sessions, as well as a comprehensive range of evaluated outcomes,
- 12 effectively reduces biases and confounding factors.
- 13 51
- 14 52
- 15 53 • Cutting edge technology, such as the metabolic chamber and dual-energy X-ray
- 16 absorptiometry, enables precise outcome measures.
- 17 54
- 18 55 • The multi-omics approach, incorporating gut microbiome, gene expression, and genetic
- 19 polymorphisms, supports the progress of precision nutrition and facilitates the
- 20 examination of causal relationships and underlying mechanisms .
- 21 56
- 22 57
- 23 58 • A primary limitation of the study is the absence of a placebo group and the fact it is not
- 24 not double-blinded.
- 25 59
- 26 60 • Since the gut microbiome analysis depends on fecal samples, it might not fully
- 27 represent changes in the gut microbiome composition occurring in more proximal parts
- 28 of the gastrointestinal tract.
- 29 61
- 30 62
- 31 63
- 32
- 33
- 34
- 35
- 36
- 37
- 38
- 39
- 40
- 41
- 42
- 43 64 **Word-count:** 5072 words.
- 44
- 45
- 46
- 47
- 48
- 49
- 50
- 51
- 52
- 53
- 54
- 55
- 56
- 57
- 58
- 59
- 60

## 65 INTRODUCTION

66 Excess body weight can be defined as a body mass index (BMI)  $\geq 25.0$  kg/m<sup>2</sup> (1), which  
67 encompasses both the overweight and obesity categories (2). This condition has been  
68 associated with a state of systemic low-grade chronic inflammation, which is characterized by  
69 a persistent activation of immune and non-immune cells and production of cytokines,  
70 chemokines, and acute phase proteins (3, 4). Those inflammatory biomarkers include  
71 interleukins (IL), such as IL-6 and IL-8, tumor necrosis factor- $\alpha$  (TNF- $\alpha$ ), and C-reactive  
72 protein (CRP) (3). Systemic low-grade chronic inflammation causes tissue and organ damage,  
73 which can, in turn, lead to the onset and progression of chronic diseases, such as diabetes  
74 mellitus, cancer, metabolic syndrome, and cardiovascular diseases (3).

75 In individuals with excessive body weight, the state of systemic low-grade chronic  
76 inflammation can be mediated by increased adiposity, as well as by mechanisms through the  
77 gut microbiota (3). Increased adipocyte size (i.e., hypertrophy) is associated with cellular  
78 dysfunction and distress (5, 6). Hypertrophic adipocytes secrete an increased number of pro-  
79 inflammatory chemokines, such as TNF- $\alpha$ , IL-6, IL-8, and monocyte chemoattractant protein  
80 1 (MCP-1) (4-6). The increased size of adipocytes and cytokine production lead to adipose  
81 tissue hypoxia and death, as well as local and systemic inflammation (4-6).

82 Excess body weight is associated with altered gut microbiome composition and reduced  
83 microbiome diversity, which might cause metabolic aberrations and enrich for opportunistic  
84 pathogens (e.g. at the epithelial interface) that contribute to inflammation (7, 8). Individuals  
85 with excessive body weight usually present with altered gut permeability, which elevates  
86 systemic levels of endotoxins (i.e., lipopolysaccharides) (3). When in the bloodstream,  
87 lipopolysaccharides binds to toll-like receptor 4 leading to activation of nuclear factor kappa B  
88 and consequently production of pro-inflammatory cytokines, including IL-6 and TNF- $\alpha$  (8).

1  
2  
3 89 Considering the numerous negative health outcomes associated with excess body  
4  
5 90 weight, much effort has been made to develop effective weight management strategies. Among  
6  
7 91 those are meal replacements, which are food products fortified with vitamins and minerals used  
8  
9 92 to replace one or more meals per day. Meal replacements are commonly used in association  
10  
11 93 with calorie restriction. Research has shown that the consumption of meal replacements leads  
12  
13 94 to greater weight loss when compared to reduced-calorie diets alone (9, 10). Improvement in  
14  
15 95 metabolic parameters is generally observed with weight loss, including improvement in  
16  
17 96 glucose metabolism, reduction of triacylglycerol, low-density lipoprotein cholesterol (LDL-C),  
18  
19 97 systolic blood pressure (9, 11, 12), and the inflammatory markers CRP and IL-6 (13).  
20  
21 98 Considering the positive health effects of weight loss in individuals with excessive body weight  
22  
23 99 (14-16) and the beneficial health effects of meal replacements (9, 11), it is important to  
24  
25 100 differentiate the effects of meal replacements from that of weight loss on overall health, which  
26  
27 101 have not been investigated so far. Therefore, the aim of this study is to compare the effects of  
28  
29 102 a 12-week consumption of a powdered meal replacement (PMR group), given as a soy-yogurt-  
30  
31 103 honey formula (17), versus usual diet (control group, CON) on inflammation, gut microbiome,  
32  
33 104 overall metabolic health, gene expression profile, and genetic background in individuals with  
34  
35 105 excessive body weight who are in weight maintenance.  
36  
37  
38  
39  
40  
41  
42  
43  
44  
45  
46  
47  
48  
49  
50  
51  
52  
53  
54  
55  
56  
57  
58  
59  
60

## 107 **METHODS**

### 108 **Study design and ethical procedures**

109 This study is a randomized, controlled, parallel group, clinical trial conducted at the  
110 Human Nutrition Research Unit (HNRU), University of Alberta (Edmonton, AB, Canada). The  
111 study is an Investigator Initialized Trial sponsored by the Almased Wellness Comp.,  
112 Bienenbüttel, Germany. The corresponding research protocol fulfils the requirements of the  
113 Standard Protocol Items: Recommendations for Interventional Trials (SPIRIT) checklist (18).

1  
2  
3 114 This research protocol was approved by the University of Alberta Ethics Board (HREB,  
4  
5 115 identifier Pro00070712) and complies with the standards established by the Canadian Tri-  
6  
7  
8 116 Council Policy statement on the use of human participants in research. Procedures and potential  
9  
10 117 risks involved in the study are discussed with participants prior to obtaining informed consent  
11  
12 118 (supplementary material). This protocol is registered on ClinicalTrials.gov (NCT03235804),  
13  
14  
15 119 and recruitment started on April 2019 and is expected to finish in November 2023 (**Table 1**).

16  
17 **Table 1.** World Health Organization trial registration dataset

| <b>Data category</b>                          | <b>Information</b>                                                                                                                                                                                 |
|-----------------------------------------------|----------------------------------------------------------------------------------------------------------------------------------------------------------------------------------------------------|
| Primary registry and trial identifying number | ClinicalTrials.gov NCT03235804                                                                                                                                                                     |
| Date of registration in primary registry      | August 1, 2017                                                                                                                                                                                     |
| Secondary identifying numbers                 | University of Alberta Research Ethics Board # Pro00070712                                                                                                                                          |
| Source(s) of monetary or material support     | Almased Wellness-GmbH (Bienenbüttel, Germany)                                                                                                                                                      |
| Primary sponsor                               | Almased Wellness-GmbH (Bienenbüttel, Germany)                                                                                                                                                      |
| Secondary sponsor(s)                          | N/A                                                                                                                                                                                                |
| Contact for public queries                    | Dr Carla Prado +1 (780) 492-9555 <a href="mailto:carla.prado@ualberta.ca">carla.prado@ualberta.ca</a> and Jens Walter +353 (0)21 490-1773 <a href="mailto:jenswalter@ucc.ie">jenswalter@ucc.ie</a> |
| Contact for scientific queries                | Dr Carla Prado +1 (780) 492-9555 <a href="mailto:carla.prado@ualberta.ca">carla.prado@ualberta.ca</a> and Jens Walter +353 (0)21 490-1773 <a href="mailto:jenswalter@ucc.ie">jenswalter@ucc.ie</a> |
| Public title                                  | The impact of a powdered meal replacement on metabolism and gut microbiota (Premium Study)                                                                                                         |
| Scientific title                              | The impact of a powdered meal replacement on metabolism and gut microbiota: a 12-week study in individuals with excessive body weight (The PREMIUM Study)                                          |
| Countries of recruitment                      | Canada                                                                                                                                                                                             |
| Health condition(s) or problem(s) studied     | Overweight and obesity                                                                                                                                                                             |
| Intervention(s)                               | Powdered meal replacement                                                                                                                                                                          |

|                                                     |                                                                                                                                                                                                                                                                                                                                                                                                                                                                                                                                   |
|-----------------------------------------------------|-----------------------------------------------------------------------------------------------------------------------------------------------------------------------------------------------------------------------------------------------------------------------------------------------------------------------------------------------------------------------------------------------------------------------------------------------------------------------------------------------------------------------------------|
| Key inclusion and exclusion criteria                | Inclusion Criteria: (a) female/male aged 18 to 50 years; (b) non-smoker; (c) body mass index (BMI) between 25 and 37 kg/m <sup>2</sup> ; (d) weight stable; (e) fat mass $\geq 20\%$ for men and $\geq 25\%$ for women; (f) stable physical activity level.<br><br>Exclusion Criteria: (a) diagnosis of chronic diseases or acute infections; (b) taking any medication that may alter study outcomes; (c) taking pre- and probiotics; (d) use of antibiotics in the past two months; (e) females that are pregnant or lactating. |
| Study type                                          | Randomized controlled trial                                                                                                                                                                                                                                                                                                                                                                                                                                                                                                       |
| Date of first enrolment                             | April 1, 2019                                                                                                                                                                                                                                                                                                                                                                                                                                                                                                                     |
| Sample size                                         | 88                                                                                                                                                                                                                                                                                                                                                                                                                                                                                                                                |
| Recruitment status                                  | Actively recruiting                                                                                                                                                                                                                                                                                                                                                                                                                                                                                                               |
| Primary outcome(s)                                  | Interleukin-6                                                                                                                                                                                                                                                                                                                                                                                                                                                                                                                     |
| Key secondary outcomes                              | Gut microbiota                                                                                                                                                                                                                                                                                                                                                                                                                                                                                                                    |
| Ethics review                                       | University of Alberta Research Ethics Board # Pro00070712                                                                                                                                                                                                                                                                                                                                                                                                                                                                         |
| Completion date                                     | N/A                                                                                                                                                                                                                                                                                                                                                                                                                                                                                                                               |
| Summary results                                     | N/A                                                                                                                                                                                                                                                                                                                                                                                                                                                                                                                               |
| Individual Participant Data (IPD) sharing statement | De-identified data will be shared with the participant upon completion of the study (publication)                                                                                                                                                                                                                                                                                                                                                                                                                                 |

121

## 122 Outcome measures

123 The primary study outcome is to compare changes in IL-6 concentration over time  
 124 (within groups) and between the PMR and CON groups. Secondary outcome is to examine  
 125 shifts in in gut microbiome composition over time (within groups) and between the PMR and  
 126 CON groups, such as diversity indices and relative abundances of bacteria at different  
 127 taxonomic levels (i.e., phylum, family, genus, and amplicon sequence variant [ASV]), as  
 128 assessed by 16S rRNA sequencing. Exploratory outcomes include:

- 1  
2  
3 129 • Change in markers of systemic inflammation (high-sensitivity CRP [hs-CRP], IL-8, and  
4  
5 130 TNF- $\alpha$ ) and immune modulation (IL-10) over time (within groups) and between the  
6  
7 131 PMR and CON groups.  
8  
9  
10 132 • Change in concentrations of metabolic blood markers (glucose, insulin, total  
11  
12 133 cholesterol, LDL-C, high-density lipoprotein cholesterol [HDL-C], triglycerides,  
13  
14 134 peptide tyrosine-tyrosine [PYY], glucagon-like peptide-1 [GLP-1], ghrelin,  
15  
16 135 adiponectin, leptin, free glycerol, free fatty acids, and thyroid stimulating hormone  
17  
18 136 [TSH]) over time (within groups) and between the PMR and CON groups.  
19  
20  
21 137 • Change in resting energy expenditure (REE) and respiratory exchange ratio (RER) over  
22  
23 138 time (within groups) and between the PMR and CON groups.  
24  
25  
26 139 • Change in body composition (fat mass [FM] and lean soft tissue [LST]) over time  
27  
28 140 (within groups) and between the PMR and CON groups.  
29  
30  
31 141 • Change in appetite sensations (hunger, satiety, fullness, and prospective food  
32  
33 142 consumption) over time within the PMR group.  
34  
35  
36 143 • Differences in the responses to the intervention according to genetic polymorphisms  
37  
38 144 over time.  
39  
40  
41 145 • Changes in inflammation and excess body weight-related gene expression profile over  
42  
43 146 time and between the PMR and CON groups.  
44  
45  
46  
47  
48

## 148 **Research participants**

149 Inclusion criteria are as follows: male or female; non-smoker; between 18 and 50 years  
150 of age; BMI between 25.0 and 37.0 kg/m<sup>2</sup>; with a stable body weight 6 months prior to study  
151 initiation (i.e., variation <5 kg); fat mass  $\geq 20\%$  for males and  $\geq 25\%$  for females; willingness  
152 to maintain stable physical activity level throughout the study; and females must use effective  
153 birth control methods.  
154  
155  
156  
157  
158  
159  
160

1  
2  
3 154 Exclusion criteria includes participation in >3 hours per week of vigorous physical  
4  
5 155 activity; pregnancy or lactation; diagnosis of any chronic or acute diseases (except for excess  
6  
7 156 body weight); use of any medication that impacts study outcomes, except for antidepressants,  
8  
9 157 anxiolytic, and/or thyroid replacement therapy in a stable dose 3 months prior to study initiation  
10  
11 158 and throughout the study period; use of antibiotics 2 months prior to study initiation; use of  
12  
13 159 protein supplements 1 month prior to study initiation; allergy to PMR ingredients (soy, honey,  
14  
15 160 and yogurt); allergy or intolerance to soy, gluten, and/or lactose; following a vegetarian, vegan,  
16  
17 161 or any other restrictive dietary pattern; claustrophobia; or being unable to comprehend and  
18  
19 162 complete the required questionnaires. Participants consuming supplements or food items that  
20  
21 163 contain pre- or probiotics (e.g., kefir or kombucha) before being enrolled in the study will be  
22  
23 164 asked to discontinue the use of these products and wait 1 month before starting the study. The  
24  
25 165 use of other nutritional supplements, such as multivitamins and vitamin D<sub>3</sub> will be allowed if  
26  
27 166 on a stable dose.  
28  
29  
30  
31  
32

167

### 168 **Recruitment, randomization, and intervention**

169 Study advertisement is done using flyers displayed at the University of Alberta  
170 campuses, surrounding communities, other post-secondary education institutions in Edmonton  
171 (AB, Canada), and health care centres in the city. The study is also advertised in University of  
172 Alberta email lists, newspapers, classrooms presentations, and on social media (e.g., Kijiji,  
173 Facebook, and Twitter). Additionally, a personalized website (premium.ualberta.ca) was  
174 created.

175 Individuals interested in being part of the study will be invited to attend a screening  
176 visit at the HNRU. This visit will include anthropometric measurements (i.e., height, weight,  
177 and waist circumference), body composition assessment (bioelectrical impedance analysis  
178 [BIA]), blood tests (i.e., creatinine, estimated glomerular filtration rate [eGFR], albumin,



179 aspartate transaminase [AST], alanine transaminase [ALT], sodium, potassium, chloride, and  
 180 TSH), review of medical history, and completion of a physical activity questionnaire. Although  
 181 glucose, insulin, or lipid panel tests are not conducted during the screening visit, individuals  
 182 who exhibit symptoms of or are taking medications for chronic diseases (e.g., diabetes,  
 183 hypertension, and dyslipidemia) are deemed ineligible for participation.

184 If deemed eligible, participants are randomly assigned into either the CON or PMR  
 185 group. Randomization is stratified by sex using a Microsoft Office Excel® spreadsheet.

186 To guarantee impartial allocation of participants to the groups, a study team member  
 187 created a list of random numbers and assigns them to each group in a concealed and systematic  
 188 manner. Subsequently, a second investigator follows the predetermined order of numbers and  
 189 assigns participants to their respective groups based on the order of their screening.

190 Participants assigned to the CON group are asked to maintain their usual diet for 12  
 191 weeks. The ones in the PMR group are asked to replace their morning and afternoon snacks  
 192 using a powdered meal replacement (Almased Wellness Comp., Bienenbüttel, Germany) and  
 193 otherwise maintain their usual diet for 12 weeks. Each snack is replaced by 50 grams of powder  
 194 mixed with 250 mL of water. The nutritional information of the meal replacement is displayed  
 195 in **Table 2**.

196 **Table 2.** Nutritional information of the tested soy-honey-yogurt formula, a powdered meal  
 197 replacement (PMR)

| Nutrient                       | 50 g of Product (PMR) |
|--------------------------------|-----------------------|
| Calories (kcal)                | 180                   |
| Total fat (g)                  | 1.0                   |
| <i>Saturated fat (g)</i>       | 0.5                   |
| <i>Trans fat (g)</i>           | 0                     |
| <i>Polyunsaturated fat (g)</i> | 0.1                   |

|                                |     |
|--------------------------------|-----|
| <i>Monounsaturated fat (g)</i> | 0.4 |
| Cholesterol (mg)               | 3   |
| Total carbohydrates (g)        | 15  |
| <i>Dietary fiber (g)</i>       | 0.5 |
| <i>Sugars (g)</i>              | 15  |
| Protein (g)                    | 27  |
| Sodium (mg)                    | 340 |
| Potassium (mg)                 | 500 |
| Vitamin A (IU)                 | 794 |
| Vitamin C (mg)                 | 16  |
| Vitamin E (IU)                 | 6   |
| Thiamin (Vitamin B1) (mg)      | 5   |
| Riboflavin (Vitamin B2) (mg)   | 6   |
| Vitamin B6 (mg)                | 7   |
| Calcium (mg)                   | 215 |
| Iron (mg)                      | 4.9 |

198

199

## 200 **Experimental protocol**

201 The study design is illustrated in **Figure 1**. The schedule of enrollment, interventions,  
 202 and assessments are shown in **Figure 2**. Following the screening visit and randomization  
 203 process, enrolled participants are invited to attend 3 study visits: baseline, week 6, and week  
 204 12. Assessments during each of these visits include: 1-hour resting metabolic rate (RMR),  
 205 blood draw, body composition, and physical activity questionnaire. They additionally receive  
 206 stool collection kits and instructions for fecal sample collection. During the baseline visit,

1  
2  
3 207 participants receive a scale and a journal to record the following information daily: body  
4  
5 208 weight, date and time of meal replacement intake (PMR group only), and medication intake (if  
6  
7 209 any). They are also asked to record on a weekly basis a 24h dietary recall (both groups) and fill  
8  
9 210 out appetite sensation questionnaires (PMR group only). Instructions on how to fill out the  
10  
11 211 journal and dietary records are given. Additionally, participants assigned to the PMR group  
12  
13 212 receive 84 packages of the PMR during visits at baseline and week 6, as well as instructions on  
14  
15 213 how to prepare it. Those assigned to the PMR group start consuming the supplement the day  
16  
17 214 after the first stool sample collection. Study materials (study journal and scale) are returned on  
18  
19 215 week 12.

20  
21  
22  
23  
24 216 A member of the study team contacts participants weekly to verify adherence to the  
25  
26 217 dietary intervention and potential adverse events. Their body weight is also discussed at that  
27  
28 218 time. If a body weight change greater than  $\pm 2\%$  of their initial body weight is noticed, a  
29  
30 219 nutrition consult with a Registered Dietitian is scheduled to provide instructions on how to  
31  
32 220 increase or decrease food intake and physical activity levels to return to baseline body weight.

### 33 34 35 221 36 37 222 *Anthropometry and body composition*

38  
39  
40 223 At the screening visit, anthropometric measurements are taken twice, and the average  
41  
42 224 is used for data analysis. Height is measured using a digital stadiometer (235 Heightronic™,  
43  
44 225 Concepts, Quick Medical, Snoqualmie, WA, USA) to the nearest 0.1 cm. Body weight is  
45  
46 226 measured to the nearest 0.1 kg using a calibrated digital scale (Health-o-meter® Professional  
47  
48 227 Remote Display, Sunbeam Products Inc., FL, USA). Waist circumference is measured using a  
49  
50 228 measuring tape at the level of participant's belly button, as per standard procedure (19).

51  
52  
53 229 A digital scale (HD-314 TANITA Corporation, Tokyo, Japan) is provided to  
54  
55 230 participants during the baseline visit, which is returned at the study completion. Body weight  
56  
57 231 is recorded daily in the morning in a fasting state, and with an empty bladder.

1  
2  
3 232 Body composition is assessed using dual energy X-ray absorptiometry (DXA, GE  
4  
5 233 Lunar iDXA, General Electric Company, Madison, USA), air displacement plethysmography  
6  
7 234 (ADP, Bod Pod 1SB-060M, Life Measurement Instruments, Concord, CA, USA), and BIA  
8  
9 235 (Seca mBCA525, Seca GmbH & Co, Hamburg, Germany). A number of techniques is being  
10  
11 236 used to explore potential changes in body composition using multicompartiment modeling:  
12  
13 237 DXA for bone mineral content, BIA for total body water, ADP for body density, which is used  
14  
15 238 to calculate the remaining compartment: adipose tissue and residues (i.e., dry LST) (20, 21).  
16  
17  
18  
19  
20  
21

239

#### 240 *Resting energy expenditure*

241 Resting energy expenditure is assessed by indirect calorimetry using an open-circuit  
242 metabolic chamber, which measures the volume of oxygen (O<sub>2</sub>) and carbon dioxide (CO<sub>2</sub>) from  
243 participant's respiration. Participants lie down in a relaxed position without falling asleep and  
244 breathe normally for 60 minutes. Mixed air with the expired CO<sub>2</sub> is drawn from the chamber  
245 at a constant flow rate (60 ± 2 L/min) while fresh air with constant O<sub>2</sub> is passively drawn into  
246 the chamber. The first 30 minutes of the test are considered time for acclimatization and hence  
247 removed from analysis. Gas exchange (volume of CO<sub>2</sub> and O<sub>2</sub>) is analysed minute-by-minute  
248 by the Advance Optima AO2000 Series CO<sub>2</sub> analyser (ABB Automation GmbH, Frankfurt,  
249 Germany) and the Oxymat 6 O<sub>2</sub> analyser (Siemens AG, Munich, Germany). Data is transferred  
250 from those analysers to a computer (Acer Aspire AM3910-E3122, Acer Inc., New Taipei City,  
251 Taiwan) via the National Instruments NI USB-6221 device (National Instruments Corporation,  
252 Austin, Tex., USA) using the PMCSS Software version 1.8 (Pennington Metabolic Chamber  
253 Software Suite, Pennington Biomedical Research Center, La., USA). Resting energy  
254 expenditure (kcal/day) is calculated using the average kcal/min multiplied by 1440.

255

#### 256 *Blood analysis*

257 Blood is sampled from participants by venipuncture after an overnight fast during the  
 258 screening visit and at baseline, week 6, and week 12. Evaluated biomarkers are listed in **Table**  
 259 **3**.

260 **Table 3.** Blood parameters, sample, and laboratory responsible for blood analysis

| Parameter                 | Screening | Baseline | Week 6 | Week 12 | Sample      | Laboratory |
|---------------------------|-----------|----------|--------|---------|-------------|------------|
| Albumin                   | x         |          |        |         | Serum       | External   |
| Creatinine/eGFR           | x         |          |        |         | Serum       | External   |
| ALT                       | x         |          |        |         | Serum       | External   |
| AST                       | x         |          |        |         | Serum       | External   |
| Electrolytes <sup>a</sup> | x         |          |        |         | Serum       | External   |
| TSH                       | x         | x        | x      | x       | Serum       | External   |
| hs-CRP                    |           | x        | x      | x       | Serum       | External   |
| Glucose                   |           | x        | x      | x       | Serum       | External   |
| Lipid panel <sup>b</sup>  |           | x        | x      | x       | Serum       | External   |
| Free glycerol             |           | x        | x      | x       | Serum       | On site    |
| Free fatty acids          |           | x        | x      | x       | Serum       | On site    |
| Interleukins <sup>c</sup> |           | x        | x      | x       | Plasma      | On site    |
| TNF- $\alpha$             |           | x        | x      | x       | Plasma      | On site    |
| Insulin                   |           | x        | x      | x       | Plasma      | On site    |
| Leptin                    |           | x        | x      | x       | Plasma      | On site    |
| Adiponectin               |           | x        | x      | x       | Plasma      | On site    |
| PYY                       |           | x        | x      | x       | Plasma      | On site    |
| GLP-1                     |           | x        | x      | x       | Plasma      | On site    |
| Ghrelin                   |           | x        | x      | x       | Plasma      | On site    |
| Polymorphisms             |           | x        |        |         | Whole blood | On site    |

| Gene expression | x | x | Whole blood | On site |
|-----------------|---|---|-------------|---------|
|-----------------|---|---|-------------|---------|

261 <sup>a</sup>Electrolytes include chloride, sodium, and potassium. <sup>b</sup>Lipid panel include triglycerides, total  
 262 cholesterol, LDL-C, and HDL-C. <sup>c</sup> Interleukins include IL-6, IL-8, and IL-10. Abbreviations:  
 263 ALT alanine aminotransferase; AST aspartate aminotransferase; eGFR estimated glomerular  
 264 filtration rate; GLP-1 glucagon like peptide; hs-CRP high-sensitivity C-reactive protein; PYY  
 265 peptide tyrosine-tyrosine; TNF- $\alpha$  tumor necrosis factor  $\alpha$ ; TSH thyroid stimulating hormone.

267 Blood samples are collected using BD Vacutainer<sup>®</sup> tubes (Becton, Dickinson and  
 268 Company, Franklin Lakes, NJ, USA). Tubes containing silica and a polymer are used for serum  
 269 separation, tubes containing K2-ethylenediaminetetraacetic acid (EDTA) are used for plasma  
 270 separation, and tubes containing K2EDTA and protease inhibitors (dipotassium and tacrine,  
 271 BD P800) are used for GLP-1 and ghrelin analysis.

272 Creatinine, eGFR, albumin, AST, ALT, sodium, potassium, chloride, and TSH are  
 273 analysed by an external lab (DynaLIFE Medical Labs, Edmonton, AB, Canada) at the screening  
 274 visit prior to enrollment. Glucose, lipid panel (triglycerides, total cholesterol, LDL-C, and  
 275 HDL-C), TSH, and hs-CRP will be analysed by DynaLIFE Medical Labs (Edmonton, AB,  
 276 Canada). Interleukin 6, IL-8, IL-10, TNF- $\alpha$ , insulin, PYY, GLP-1, ghrelin, adiponectin, leptin,  
 277 free glycerol, and free fatty acids will be analysed in our laboratory (University of Alberta, AB,  
 278 Canada). Interleukin 6, IL-8, IL-10, TNF- $\alpha$ , insulin, PYY, GLP-1, ghrelin, adiponectin, and  
 279 leptin will be analysed by electrochemiluminescence immunoassay (MesoScale Discovery<sup>®</sup>,  
 280 Maryland, USA).

281 An additional blood draw is requested the day following each study visit for hs-CRP  
 282 analysis due to this being a sensitive marker which can vary substantially within hours of  
 283 collection for several reasons (22). Therefore, the average of CRP measured on two consecutive  
 284 days will be taken in case they are similar. If a participant is in an infectious state (i.e., CRP

1  
2  
3 285 >10 mg/L or significant changes between the two days measurement) the highest value will be  
4  
5 286 excluded from analysis.

7 287 For gene expression profile, ribonucleic acids (RNAs) will be sequenced at baseline  
8  
9 288 and week 12. Whole blood (500  $\mu$ L) is aliquoted into an RNase-free microfuge tube and added  
10  
11 289 1.3 mL of RNAlater stabilization solution (Thermo Fisher Scientific, Waltham, MA, USA).  
12  
13 290 Total RNA will be extracted from whole blood using the RiboPure™ Blood Kit (Thermo Fisher  
14  
15 291 Scientific, Waltham, USA). The RNA purity will be determined by measuring the 260/280 nm  
16  
17 292 ratio (ideal ratio ~2.0) and the 260/230 nm ratio (ideal ratio 2.0-2.2) using a spectrophotometer.  
18  
19 293 The quality of RNA samples will be evaluated prior to library preparation for RNA-Seq, using  
20  
21 294 a bioanalyzer and an RNA Integrity Number (RIN)  $\geq 7$  will be accepted. Samples of high purity  
22  
23 295 and quality RNA will be prepared with the TruSeq RNA Sample Prep kit (Illumina, San Diego,  
24  
25 296 USA). The sequencing will be performed by an external company using the platform Illumina  
26  
27 297 HiSeq 4000 (Illumina, San Diego, USA), in the paired-end mode, in which the 2 ends will be  
28  
29 298 sequenced with a length of 100 base pairs (bp) (2 x 100 bp). At the end, 2 files in the 'fastq'  
30  
31 299 format will be generated for each of the evaluated samples.

32  
33 300 We will select a set of candidate genes that are known to be involved in the regulation  
34  
35 301 of inflammation and/or excess body weight and are differentially expressed after the  
36  
37 302 intervention. From these genes, we will analyze the most extensively studied polymorphisms.  
38  
39 303 The reasoning behind this approach is that genetic variations in these candidate genes could  
40  
41 304 potentially impact the expression and/or function of the proteins they encode, ultimately  
42  
43 305 influencing the response to the intervention. Genetic polymorphisms will be analysed at  
44  
45 306 baseline. Genomic deoxyribonucleic acid (gDNA) will be extracted with the QIAamp DNA  
46  
47 307 Micro Kit (Qiagen, Hilden, Germany) from leukocytes in peripheral blood. The gDNA purity  
48  
49 308 will be verified in a spectrophotometer at 260 and 280 nm. The samples will be considered of  
50  
51 309 good quality if the ratio between absorbances is between 1.7 and 2.0. The gDNA concentration  
52  
53  
54  
55  
56  
57  
58  
59  
60

1  
2  
3 310 will be measured on a fluorimeter. For genotyping, a customized Infinium Global Screening  
4  
5 311 Array-24 + v3.0 Kit (Illumina, San Diego, USA) will be used.  
6  
7  
8 312

9  
10 313 *Fecal sample collection and gut microbiome sequencing*  
11

12 314 A total of three fecal samples are collected at baseline, week 6, and week 12. Fecal  
13  
14 315 samples are either collected at the HNRU the day of the study visits, or at home, kept at room  
15  
16 316 temperature, and delivered to the HNRU as soon as possible. During the baseline visit,  
17  
18 317 participants are instructed on how to collect fecal samples using the provided collection kits.  
19  
20 318 The fecal collection tubes (DNA/RNA Shield, Zymo Research, Irvine, CA, USA) preserve  
21  
22 319 nucleic acids in the sample and maintain stability at room temperature. Once delivered to the  
23  
24 320 lab, the fecal sample tubes are frozen at -80°C until processing and analysis.  
25  
26  
27

28 321 The microbial DNA will be extracted from all samples including positive and negative  
29  
30 322 controls, using QIAamp Fast DNA Stool Mini Kit as previously described (23), packed with  
31  
32 323 dried-ice, and shipped to University of Minnesota Genomic Center (Minnesota, US) for  
33  
34 324 sequencing. Shipping will adhere the regulation of Environment, Health and Safety  
35  
36 325 Department, University of Alberta. MiSeq Illumina technology (300 bp pair-end) will be used  
37  
38 326 to sequence 16S ribosomal ribonucleic acid (rRNA) targeting V5-V6 region to characterize the  
39  
40 327 fecal microbiome composition using primer pair 784F [5'-RGGATTAGATACCC -3'] and  
41  
42 328 1064R [5'-CGACRRCCATGCANACCT-3'].  
43  
44  
45  
46  
47  
48  
49

50 330 *Physical activity questionnaire*  
51

52 331 The Godin-Shephard leisure-time physical activity questionnaire will be completed at  
53  
54 332 baseline, week 6, and week 12 to estimate physical activity levels (24, 25). In this questionnaire,  
55  
56 333 participants answer how often they perform strenuous, moderate, and light exercise for more  
57  
58 334 than 15 minutes in one week. A physical activity score is calculated based on intensity =  $(9 \times$   
59  
60



1  
2  
3 335 strenuous) + (5 × moderate) + (3 × light) (25, 26). This will be used to classify participants as  
4  
5 336 insufficiently active (<14 units), moderately active (≥14 and <24 units), or active (≥24 units)  
6  
7  
8 337 (26).  
9

10 338

### 11 339 *Dietary intake*

12  
13  
14 340 The dietary intake will be assessed using the online Automated Self-Administered 24-  
15  
16 341 hour Recall (ASA24®) Canada (27). A paper-based version is available per individual  
17  
18 342 participant and is returned to the study team weekly by email or fax. Dietary information is  
19  
20 343 entered in ASA24® to ensure consistency. Three 24h recalls are completed at weeks 1, 6, and  
21  
22 344 12 (two weekdays and one weekend day) and one 24h recall per week on the remaining weeks  
23  
24 345 of the study period (one weekday). Energy, macronutrients, and micronutrients intake will be  
25  
26 346 obtained using ASA24® automated coding based on the amount of each food consumed.  
27  
28  
29

30 347

### 31 348 *Appetite sensations*

32  
33 349 To assess how the PMR affects appetite, participants assigned to the PMR group rate  
34  
35 350 their appetite sensations using the study journals once a week and at five timepoints: 1)  
36  
37 351 immediately after waking up/fasting, 2) immediately before the morning PMR consumption,  
38  
39 352 3) 30 minutes after the morning PMR consumption, 4) immediately before the afternoon PMR  
40  
41 353 consumption, and 5) 30 minutes after the afternoon PMR consumption. Hunger, satiety,  
42  
43 354 fullness, and prospective food consumption will be assessed using a paper-and-pen 100-mm  
44  
45 355 visual analogue scale (28). They are instructed to make a single vertical mark between 2  
46  
47 356 anchors to indicate the intensity of their subjective states regarding each element, on a scale  
48  
49 357 from 0 to 100 mm. The following questions are asked: How hungry do you feel? (I am not  
50  
51 358 hungry at all – I have never been more hungry); How satisfied do you feel? (I am completely  
52  
53  
54  
55  
56  
57  
58  
59  
60

1  
2  
3 359 empty – I cannot eat another bite); How full do you feel? (not at all full – totally full); How  
4  
5 360 much do you think you can eat? (nothing at all – a lot).  
6  
7  
8 361

9  
10 362 *Adherence and withdraw/discontinuation*

11  
12 363 Participants are immediately withdrawn from the study if they: 1) have significant  
13  
14 364 variation in body weight ( $>\pm 3\%$  of baseline body weight (29)) that does not return to baseline  
15  
16 365 2 weeks after the nutrition consult; 2) become pregnant; 3) start or change medications or  
17  
18 366 supplement intake listed in the eligibility criteria; 4) no longer meet the inclusion criteria.  
19  
20 367 Participants assigned to the PMR group are asked to return all supplement bags (empty or not)  
21  
22 368 to the visits on week 6 and 12. These are weighted, and participants are excluded from the  
23  
24 369 study if the PMR have not been consumed twice daily during the 12 weeks or if there is  $>20\%$   
25  
26 370 of product left inside the bags. In addition, participants can withdraw from the study at any  
27  
28 371 time.  
29  
30  
31  
32

33 372

34  
35 373 **Statistical analyses**

36  
37 374 *Sample size estimate*

38  
39 375 A total of 74 participants (37 in each group) will be needed to detect a medium effect  
40  
41 376 size of 0.669. The effect size was calculated based on a previously published study (30), in  
42  
43 377 which the mean percent change in IL-6 from baseline to 12 months was  $-6.76 \pm 36.95$  pg/mL  
44  
45 378 in a group receiving soy protein versus  $17.62 \pm 35.92$  pg/mL in the control group. Accounting  
46  
47 379 for a 20% attrition rate, the total sample size of 88 participants (44 in each group) will have a  
48  
49 380 power of 80% with a significance level of 5%. The sample size calculation was done using  
50  
51 381 G\*Power version 3.1.9.2.  
52  
53  
54  
55

56 382

57  
58 383 *Data analysis*  
59  
60

1  
2  
3 384 Normality of the study variables will be assessed by the Shapiro-Wilk W-test. By  
4  
5 385 inspecting boxplots, values >1.5 box-lengths from the edge of the box will be considered as  
6  
7  
8 386 outliers and may be excluded from analysis. Differences between groups of nominal variables  
9  
10 387 will be analysed by Pearson's  $\chi^2$  test or Fisher's exact test. Both group effect and time effect  
11  
12 388 will be analyzed using a two-way mixed analysis of variance (ANOVA) or analysis of  
13  
14 389 covariance (ANCOVA) as appropriate. Assumption of homogeneity of variances will be tested  
15  
16  
17 390 using Levene's test of equality of variances. Correlation between variables will be assessed by  
18  
19 391 Pearson's correlation. If significant correlations between nutrients and energy intake are  
20  
21 392 noticed, the residual method will be applied in order to describe the relationship between  
22  
23 393 aspects of food intake and biochemical characteristics independent of energy intake (31). All  
24  
25 394 analyses will be performed using IBM® SPSS® Statistics version 24 (International Business  
26  
27  
28 395 Machines Corporation), considering a critical significance value of 5%, unless otherwise  
29  
30 396 stated.

31  
32  
33 397 Regarding genetic polymorphisms analysis, adherence to the Hardy-Weinberg  
34  
35 398 equilibrium will be checked using the  $\chi^2$ -square test. The R package 'argyle' will be used to  
36  
37 399 analyze the genotype data and assess the potential impact on the responses to the intervention  
38  
39 400 (32). To verify whether the results differ among the genotypes, the dominant model (major  
40  
41 401 allele x heterozygous + minor allele) will be applied. Effect size (ES) will be assessed by  
42  
43 402 Cohen's d-test and multivariate analysis (MANOVA) will be applied, including time and  
44  
45 403 genotype as the two independent variables. For post-hoc analysis, the Stoll Dwass test ( $p < 0.05$ )  
46  
47 404 will be applied. Statistical analysis of the gene expression profile will include the evaluation  
48  
49 405 of the quality of the sequences with the FastQC tool. The Trimmomatic software (33) will be  
50  
51 406 used to remove low-quality strings and adapters. Then, the libraries will be evaluated again in  
52  
53 407 the FastQC software, for proper verification. The RNA sequencing data will be subjected to  
54  
55 408 analysis by RNA-seq using the protocol described in Trapnell, Roberts (34). The functional  
56  
57  
58  
59  
60

1  
2  
3 409 annotation of differentially expressed genes will be carried out through the GeneOntology  
4  
5 410 platform (<http://geneontology.org>). Analyses to identify differentially expressed metabolic  
6  
7 411 pathways will be performed using the fgsea package of the R software.  
8  
9

10 412 For the gut microbiome analysis, raw sequencing data will be undergone multiple  
11  
12 413 quality control steps including primer removal, trimming, chimera removal as previously  
13  
14 414 described (35, 36). Sequences will be classified using classify-sklearn algorithm (37) against  
15  
16 415 Silva database v.138 generated for given primers by RESCRIPT (38). To decontamination, non-  
17  
18 416 target sequences will be removed such as mitochondria, chloroplast and archaea. Possible  
19  
20 417 contamination detected by positive and negative controls and sequences with raw count <3 and  
21  
22 418 present in <10% of samples will be removed. Sample with an extremely low number of reads  
23  
24 419 (< 2000 after filtering) will not be considered in microbiome analysis. Filtered ASV table in  
25  
26 420 count data will be converted to relative abundant data for visualisation, then centered log-ratio  
27  
28 421 (CLR) transformed. The indices of  $\alpha$ -diversity (e.g., observed species, Shannon, Phylogenetic  
29  
30 422 Diversity, Inver Simpson) and  $\beta$ -diversity (e.g., Bray-Curtis and Aitchison distance) will be  
31  
32 423 calculated using Phyloseq (39) and microbiome (40) R packages. Bray-Curtis distance will be  
33  
34 424 used to generate non-parametric multidimensional scaling ordination plots for  $\beta$ -diversity  
35  
36 425 metrics with scaled and centered results. Stability over time will also be assessed based on  
37  
38 426 Bray-Curtis distances. The adonis2 function in R package vegan will be used for permutational  
39  
40 427 multivariate analysis of variance (PERMANOVA). Aitchison distance will be used for  
41  
42 428 Principal component analysis (PCA) in mapping microbiome and metabolic markers data to  
43  
44 429 exploring multidimensional association (23). False discovery rate (FDR) will be used to adjust  
45  
46 430 p values, and FDR<0.05 will be considered as statistically significant.  
47  
48  
49  
50  
51  
52  
53  
54  
55

56 432 **Patient and public involvement:**

57  
58 433 None.  
59  
60

1  
2  
3 4344  
5 435 **ETHICS AND DISSEMINATION**

6  
7  
8 436 This study is approved by the University of Alberta's HREB (Pro00070712) and is  
9  
10 437 registered on ClinicalTrials.gov (NCT03235804). This research adheres to the standards as set  
11  
12 438 out in the Canadian Tri-Council Policy statement on the use of human participants in research.  
13  
14 439 This study is regulated by Health Canada. Amendments will be submitted to the HREB and  
15  
16 440 Health Canada review and approval prior implementations. ClinicalTrials.gov will be updated  
17  
18 441 accordingly.

19  
20  
21 442 All personal information is kept private, and participation is anonymous. Participants  
22  
23 443 are assigned a study ID, which is kept separated from any personal information collected. A  
24  
25 444 master list with identifiable information and study IDs is cryptographically protected and stored  
26  
27 445 at the HNRU. The study information will be kept for 15 years after the completion of the study.  
28  
29 446 If participants withdraw consent, they are asked for permission to use the data collected until  
30  
31 447 that point; however, if they deny it, their data is destroyed. Absence of answer is considered as  
32  
33 448 permission to use the data. The Quality Management in Clinical Research (QMCR) Department  
34  
35 449 at the University of Alberta is independent of investigators and sponsor. The QMCR is  
36  
37 450 responsible for monitoring the study data and will conduct yearly auditing.

38  
39  
40 451 Following data collection, analysis, and review of findings, manuscripts will be  
41  
42 452 prepared for submission to peer-reviewed journals and results presented in national and  
43  
44 453 international conferences. Study findings will also be disseminated through social media. Data  
45  
46 454 will be published regardless of outcomes and the University of Alberta retains the right to  
47  
48 455 publish. Authorship eligibility will adhere to the International Committee of Medical Journal  
49  
50 456 Editors' recommended guidelines (41). As a mandate of completing a registered trial, the  
51  
52 457 results must be published within 12 months of the completion of the trial. Dataset and statistical  
53  
54 458 code may be provided upon request.

1  
2  
3 459  
4  
5  
6 460

**Figure legends:**

7  
8 461 **Figure 1.** Experimental protocol. Abbreviations: CON control group, PMR powdered meal  
9  
10 462 replacement group.

11  
12 463 **Figure 2.** Schedule of enrollment, interventions, and assessments (SPIRIT figure).  
13  
14  
15 464 Abbreviations: CON control group, PMR powdered meal replacement group.  
16

17  
18 465

19  
20 466 **Author contributions:**

21  
22 467 JM, CLPO, AMA, AB, AMS, LM, CC, SG, CR, NKN, PDC, JW, and CMP were involved in  
23  
24 468 the design of the study. JM, CLPO, AMS, JW, and CMP wrote the study protocol. JM, CLPO,  
25  
26 469 AMA, AB, AMS, LM, CC, SG, CR, NKN, PDC, JW, and CMP participated in drafting and  
27  
28 470 revising the manuscript. JM, CLPO, AMA, AB, AMS, LM, CC, SG, CR, NKN, PDC, JW, and  
29  
30 471 CMP read and approved the final manuscript.  
31  
32

33  
34 472

35  
36 473 **Funding statement:** This was an investigator-initiated trial supported by Almased Wellness-  
37  
38 474 GmbH (Bienenbüttel, Germany). Per contractual agreement, the funder has had no role in the  
39  
40 475 study design and implementation, writing of the manuscript, and decision to submit the article  
41  
42 476 for publication. Some of the infrastructure used in the project was funded by the Canadian  
43  
44 477 Foundation for Innovation John R Evans Leaders Fund (Project # 34115). CMP is supported  
45  
46 478 by a Campus Alberta Innovates Program Chair in Nutrition, Food and Health. CLPO is  
47  
48 479 supported by the Mitacs Accelerate International (Mitacs, Canada) in partnership with Almased  
49  
50 480 USA Inc.  
51

52  
53  
54 481

55  
56  
57 482 **Competing interests' statement:** In addition to what is noted under "Funding", CLPO reports  
58  
59 483 receiving honoraria and/or paid consultancy from Abbott and AMRA Medical Inc. outside the  
60

1  
2  
3 484 scope of this work. AB received research support for their departments and consultant or  
4  
5 485 speakers' honoraria from the Almased-Wellness-GmbH. AMS reports receiving honoraria  
6  
7 486 and/or paid consultancy from Novo Nordisk, Johnson & Johnson, Boehringer Ingelheim, and  
8  
9  
10 487 Xeno Biosciences outside the scope of this work. PDC is inventor on patent applications  
11  
12 488 dealing with the use of specific bacteria and components in the treatment of different diseases.  
13  
14 489 PDC was co-founder of The Akkermansia Company SA and of Enterosys S.A. JW has received  
15  
16 490 research funding and consulting fees from industry sources involved in the manufacture and  
17  
18 491 marketing of dietary fibers, prebiotics, and probiotics. JW is further a co-owner of Synbiotics  
19  
20 492 Health, a developer of synbiotic products. CMP reports receiving honoraria and/or paid  
21  
22 493 consultancy from Abbott Nutrition, Nutricia, Nestle Health Science, Fresenius Kabi, Pfizer,  
23  
24 494 and AMRA medical outside the scope of this work. Other authors declare no conflict of interest.  
25  
26  
27  
28  
29 495

## 30 496 **References**

- 31  
32  
33 497 1. Sung H, Siegel RL, Torre LA, Pearson-Stuttard J, Islami F, Fedewa SA, et al. Global  
34  
35 498 patterns in excess body weight and the associated cancer burden. CA: A Cancer Journal for  
36  
37 499 Clinicians. 2019;69(2):88-112.  
38  
39  
40 500 2. World Health Organization. Obesity and overweight World Health Organization  
41  
42 501 website2021 [Available from: [https://www.who.int/news-room/fact-sheets/detail/obesity-and-](https://www.who.int/news-room/fact-sheets/detail/obesity-and-overweight)  
43  
44 502 [overweight](https://www.who.int/news-room/fact-sheets/detail/obesity-and-overweight).  
45  
46  
47 503 3. Furman D, Campisi J, Verdin E, Carrera-Bastos P, Targ S, Franceschi C, et al. Chronic  
48  
49 504 inflammation in the etiology of disease across the life span. Nature Medicine.  
50  
51 505 2019;25(12):1822-32.  
52  
53  
54 506 4. Monteiro R, Azevedo I. Chronic inflammation in obesity and the metabolic syndrome.  
55  
56 507 Mediators of Inflammation. 2010;2010:1-10.  
57  
58  
59  
60

- 1  
2  
3 508 5. Karczewski J, Śledzińska E, Baturó A, Jończyk I, Maleszko A, Maleszko A, et al.  
4  
5 509 Obesity and inflammation. *European Cytokine Network*. 2018;29(3):83-94.  
6  
7  
8 510 6. Longo M, Zatterale F, Naderi J, Parrillo L, Formisano P, Raciti GA, et al. Adipose  
9  
10 511 tissue dysfunction as determinant of obesity-associated metabolic complications. *International*  
11  
12 512 *Journal of Molecular Sciences*. 2019;20(9):2358.  
13  
14  
15 513 7. Vallianou N, Stratigou T, Christodoulatos GS, Dalamaga M. Understanding the role of  
16  
17 514 the gut microbiome and microbial metabolites in obesity and obesity-associated metabolic  
18  
19 515 disorders: current evidence and perspectives. *Current Obesity Reports*. 2019;8(3):317-32.  
20  
21  
22 516 8. Boulangé CL, Neves AL, Chilloux J, Nicholson JK, Dumas M-E. Impact of the gut  
23  
24 517 microbiota on inflammation, obesity, and metabolic disease. *Genome Medicine*. 2016;8(1):1-  
25  
26 518 12.  
27  
28  
29 519 9. Heymsfield SB, Van Mierlo CAJ, Van Der Knaap HCM, Heo M, Frier HI. Weight  
30  
31 520 management using a meal replacement strategy: meta and pooling analysis from six studies.  
32  
33 521 *International Journal of Obesity*. 2003;27(5):537-49.  
34  
35  
36 522 10. Astbury NM, Piernas C, Hartmann-Boyce J, Lapworth S, Aveyard P, Jebb SA. A  
37  
38 523 systematic review and meta-analysis of the effectiveness of meal replacements for weight loss.  
39  
40 524 *Obesity Reviews*. 2019;20(4):569-87.  
41  
42  
43 525 11. Kempf K, Schloot NC, Gartner B, Keil R, Schadewaldt P, Martin S. Meal replacement  
44  
45 526 reduces insulin requirement, HbA1c and weight long-term in type 2 diabetes patients with >100  
46  
47 527 U insulin per day. *Journal of Human Nutrition and Dietetics*. 2014;27 Suppl 2:21-7.  
48  
49  
50 528 12. Halle M, Röhling M, Banzer W, Braumann KM, Kempf K, McCarthy D, et al. Meal  
51  
52 529 replacement by formula diet reduces weight more than a lifestyle intervention alone in patients  
53  
54 530 with overweight or obesity and accompanied cardiovascular risk factors—the ACOORH trial.  
55  
56 531 *European Journal of Clinical Nutrition*. 2021;75(4):661-9.  
57  
58  
59  
60



- 1  
2  
3 532 13. Kempf K, Röhling M, Banzer W, Braumann KM, Halle M, Mccarthy D, et al. High-  
4  
5 533 Protein, Low-Glycaemic Meal Replacement Decreases Fasting Insulin and Inflammation  
6  
7 534 Markers—A 12-Month Subanalysis of the ACOORH Trial. *Nutrients*. 2021;13(5):1433.  
8  
9  
10 535 14. Kolotkin RL, Andersen JR. A systematic review of reviews: exploring the relationship  
11  
12 536 between obesity, weight loss and health-related quality of life. *Clinical Obesity*. 2017;7(5):273-  
13  
14 537 89.  
15  
16 538 15. Forsythe LK, Wallace JMW, Livingstone MBE. Obesity and inflammation: the effects  
17  
18 539 of weight loss. *Nutrition Research Reviews*. 2008;21(2):117-33.  
19  
20 540 16. Case CC, Jones PH, Nelson K, O'Brian Smith E, Ballantyne CM. Impact of weight loss  
21  
22 541 on the metabolic syndrome. *Diabetes, Obesity and Metabolism*. 2002;4(6):407-14.  
23  
24 542 17. Berg A, McCarthy HD. A soy-yoghurt-honey product as a therapeutic functional food:  
25  
26 543 mode of action and narrative review. *Heliyon*. 2022;8(11):e11011.  
27  
28  
29 544 18. Chan A-W, Tetzlaff JM, Altman DG, Laupacis A, Gøtzsche PC, Krleža-Jerić K, et al.  
30  
31 545 SPIRIT 2013 statement: defining standard protocol items for clinical trials. *Annals of internal*  
32  
33 546 *medicine*. 2013;158(3):200-7.  
34  
35  
36 547 19. Lohman TG, Roche AF, Martorell R. Anthropometric standardization reference  
37  
38 548 manual: Human kinetics books; 1988.  
39  
40  
41 549 20. Siervo M, Jebb SA. Body composition assessment: theory into practice: introduction of  
42  
43 550 multicompart ment models. *IEEE Engineering in Medicine and Biology Magazine*.  
44  
45 551 2010;29(1):48-59.  
46  
47  
48 552 21. Fosbøl MØ, Zerahn B. Contemporary methods of body composition measurement.  
49  
50 553 *Clinical Physiology and Functional Imaging*. 2015;35(2):81-97.  
51  
52  
53 554 22. Pearson TA, Mensah GA, Alexander RW, Anderson JL, Cannon RO, Criqui M, et al.  
54  
55 555 Markers of inflammation and cardiovascular disease. *Circulation*. 2003;107(3):499-511.  
56  
57  
58  
59  
60

- 1  
2  
3 556 23. Nguyen NK, Deehan EC, Zhang Z, Jin M, Baskota N, Perez-Muñoz ME, et al. Gut  
4  
5 557 microbiota modulation with long-chain corn bran arabinoxylan in adults with overweight and  
6  
7 558 obesity is linked to an individualized temporal increase in fecal propionate. *Microbiome*.  
8  
9 559 2020;8(1).  
10  
11  
12 560 24. Godin G, Shephard R. A simple method to assess exercise behavior in the community.  
13  
14 561 *Canadian Journal of Applied Sport Sciences*. 1985;10(3):141-6.  
15  
16  
17 562 25. Shephard R. Godin leisure-time exercise questionnaire. *Medicine & Science in Sports*  
18  
19 563 *& Exercise*. 1997;29(6):S36-S8.  
20  
21 564 26. Godin G. The Godin-Shephard leisure-time physical activity questionnaire. *The Health*  
22  
23 565 *& Fitness Journal of Canada*. 2011;4(1):18-22.  
24  
25  
26 566 27. National Cancer Institute. ASA24 Automated Self-Administered 24-Hour Recall,  
27  
28 567 *Epidemiology and Genomics Research Program, Division of Cancer Control and Population*  
29  
30 568 *Sciences 2015* [Available from: <http://epi.grants.cancer.gov/asa24/>].  
31  
32  
33 569 28. Flint A, Raben A, Blundell J, Astrup A. Reproducibility, power and validity of visual  
34  
35 570 analogue scales in assessment of appetite sensations in single test meal studies. *International*  
36  
37 571 *Journal of Obesity*. 2000;24(1):38-48.  
38  
39  
40 572 29. Stevens J, Truesdale KP, McClain JE, Cai J. The definition of weight maintenance.  
41  
42 573 *International journal of obesity*. 2006;30(3):391-9.  
43  
44  
45 574 30. Mangano KM, Hutchins-Wiese HL, Kenny AM, Walsh SJ, Abourizk RH, Bruno RS,  
46  
47 575 et al. Soy proteins and isoflavones reduce interleukin-6 but not serum lipids in older women: a  
48  
49 576 randomized controlled trial. *Nutrition Research*. 2013;33(12):1026-33.  
50  
51  
52 577 31. Willett WC, Howe GR, Kushi LH. Adjustment for total energy intake in epidemiologic  
53  
54 578 studies. *The American Journal of Clinical Nutrition*. 1997;65(4):1220S-8S.  
55  
56  
57 579 32. Morgan AP. argyle: An R Package for Analysis of Illumina Genotyping Arrays. *G3*  
58  
59 580 *Genes|Genomes|Genetics*. 2016;6(2):281-6.  
60

- 1  
2  
3 581 33. Bolger AM, Lohse M, Usadel B. Trimmomatic: a flexible trimmer for Illumina  
4  
5 582 sequence data. *Bioinformatics*. 2014;30(15):2114-20.  
6  
7  
8 583 34. Trapnell C, Roberts A, Goff L, Pertea G, Kim D, Kelley DR, et al. Differential gene  
9  
10 584 and transcript expression analysis of RNA-seq experiments with TopHat and Cufflinks. *Nature*  
11  
12 585 *Protocols*. 2012;7(3):562-78.  
13  
14  
15 586 35. Bolyen E, Rideout JR, Dillon MR, Bokulich NA, Abnet CC, Al-Ghalith GA, et al.  
16  
17 587 Reproducible, interactive, scalable and extensible microbiome data science using QIIME 2.  
18  
19 588 *Nature Biotechnology*. 2019;37(8):852-7.  
20  
21  
22 589 36. Callahan BJ, Mcmurdie PJ, Rosen MJ, Han AW, Johnson AJA, Holmes SP. DADA2:  
23  
24 590 High-resolution sample inference from Illumina amplicon data. *Nature Methods*.  
25  
26 591 2016;13(7):581-3.  
27  
28  
29 592 37. Pedregosa F, Varoquaux G, Gramfort A, Michel V, Thirion B, Grisel O, et al. Scikit-  
30  
31 593 learn: Machine learning in Python. *the Journal of machine Learning research*. 2011;12:2825-  
32  
33 594 30.  
34  
35  
36 595 38. Robeson MS, O'Rourke DR, Kaehler BD, Ziemski M, Dillon MR, Foster JT, et al.  
37  
38 596 RESCRIPT: Reproducible sequence taxonomy reference database management. *PLOS*  
39  
40 597 *Computational Biology*. 2021;17(11):e1009581.  
41  
42  
43 598 39. Mcmurdie PJ, Holmes S. phyloseq: An R Package for Reproducible Interactive  
44  
45 599 Analysis and Graphics of Microbiome Census Data. *PLoS ONE*. 2013;8(4):e61217.  
46  
47  
48 600 40. Lahti L, Shetty S, Turaga N, Obenchain V, Salojärvi J, Gilmore R. Tools for  
49  
50 601 microbiome analysis in R. Version. 2017.  
51  
52  
53 602 41. International Committee of medical Journal editors. Defining the Role of Authors and  
54  
55 603 Contributors 2017 [Available from: [https://www.icmje.org/recommendations/browse/roles-](https://www.icmje.org/recommendations/browse/roles-and-responsibilities/defining-the-role-of-authors-and-contributors.html)  
56  
57 604 [and-responsibilities/defining-the-role-of-authors-and-contributors.html](https://www.icmje.org/recommendations/browse/roles-and-responsibilities/defining-the-role-of-authors-and-contributors.html).  
58  
59  
60

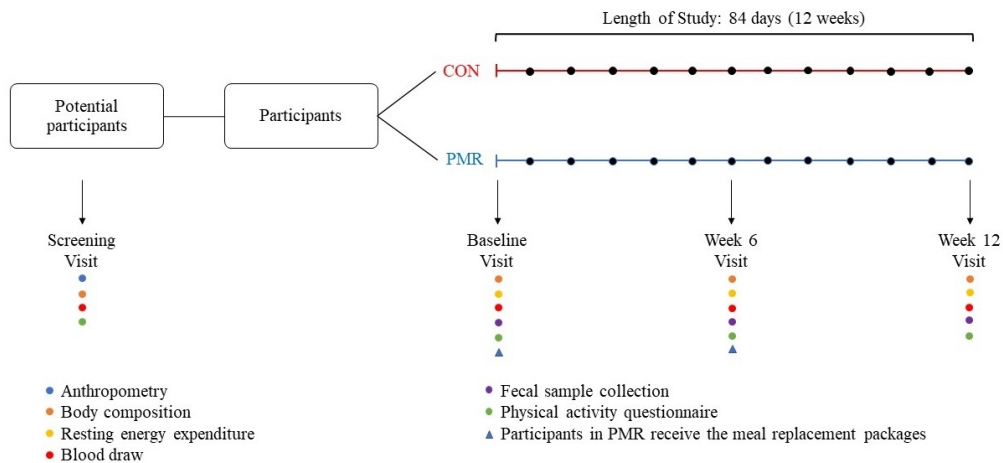

Figure 1. Experimental protocol. Abbreviations: CON control group, PMR powdered meal replacement group.

315x148mm (96 x 96 DPI)

| TIMEPOINT      |                                  | STUDY PERIOD    |                |                  |                  |                   |        |
|----------------|----------------------------------|-----------------|----------------|------------------|------------------|-------------------|--------|
|                |                                  | Enrollment      | Allocation     | Post-Allocation  |                  |                   |        |
|                |                                  | Screening visit | Post-screening | Visit 1 (week 1) | Visit 2 (week 6) | Visit 3 (week 12) | Weekly |
| ENROLLMENT     | Eligibility screen               | X               |                |                  |                  |                   |        |
|                | Informed consent                 | X               |                |                  |                  |                   |        |
|                | Anthropometry                    | X               |                |                  |                  |                   |        |
|                | Body composition                 | X               |                |                  |                  |                   |        |
|                | Blood tests                      | X               |                |                  |                  |                   |        |
|                | Questionnaires                   | X               |                |                  |                  |                   |        |
|                | Allocation                       |                 | X              |                  |                  |                   |        |
| INTERVENTIONS  | CON                              |                 |                | ●                | ●                |                   |        |
|                | PMR                              |                 |                | ●                | ●                |                   |        |
| ASSESSMENTS    | Gut microbiome                   |                 |                | X                | X                | X                 |        |
|                | Systemic inflammatory biomarkers |                 |                | X                | X                | X                 |        |
|                | Metabolic blood markers          |                 |                | X                | X                | X                 |        |
|                | Gene expression                  |                 |                | X                |                  | X                 |        |
|                | Gene polymorphisms               |                 |                | X                |                  |                   |        |
|                | Energy metabolism                |                 |                | X                | X                | X                 |        |
|                | Body composition                 |                 |                | X                | X                | X                 |        |
|                | Appetite sensation               |                 |                |                  |                  |                   | X      |
|                | Physical activity questionnaire  |                 |                | X                | X                | X                 |        |
| Dietary intake |                                  |                 |                |                  |                  | X                 |        |

Figure 2. Schedule of enrollment, interventions, and assessments (SPIRIT figure). Abbreviations: CON control group, PMR powdered meal replacement group.

205x139mm (150 x 150 DPI)

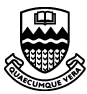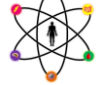

## INFORMED CONSENT FORM

**Title of Study:** The impact of a powdered meal replacement on metabolism and gut microbiota: a 12-week study in individuals with excessive body weight (The PREMIUM Study).

### **Principal Investigators:**

|                 |                       |                                 |
|-----------------|-----------------------|---------------------------------|
| Dr. Carla Prado | Phone: (780) 492-7934 | E-mail: carla.prado@ualberta.ca |
| Dr. Jens Walter |                       | E-mail: jwalter1@ualberta.ca    |
| Dr. Arya Sharma |                       | E-mail: amsharm@ualberta.ca     |

### **Qualified Investigator:**

|                  |                       |                                  |
|------------------|-----------------------|----------------------------------|
| Dr. Laurie Mereu | Phone: (780) 492-3626 | E-mail: laurie.mereu@ualberta.ca |
|------------------|-----------------------|----------------------------------|

### **Study Manager:**

|                     |                       |                             |
|---------------------|-----------------------|-----------------------------|
| Dr. Camila Oliveira | Phone: (780) 492-9010 | E-mail: premium@ualberta.ca |
|---------------------|-----------------------|-----------------------------|

### **Study Coordinator:**

|                  |                       |                             |
|------------------|-----------------------|-----------------------------|
| Julia Montenegro | Phone: (780) 492-9010 | E-mail: premium@ualberta.ca |
|------------------|-----------------------|-----------------------------|

### **Background**

Meal replacements are nutritionally complete formula foods used to substitute a meal. They can be a drink, bar, or soup. These products have been gaining popularity because they can help individuals lose weight. In addition, depending on its ingredients, meal replacements may affect our health. For this reason, meal replacements have been studied for health benefits. However, how meal replacements affect the microbes living in our gut, inflammation, and our genes is not known. Therefore, our study will investigate how a meal replacement affects these factors, as well as metabolism, the amount of fat and muscle of our bodies, and appetite. The powdered meal replacement used in this study is not investigational and is available for purchase by the public. However, because we are using it in this study to see the effect on gut microbes, this meal replacement is considered investigational by Health Canada, which has approved this study.

### **What will happen in the study?**

Participants will attend at least 4 clinic visits over a 14-week period. The day and time of your visits will be decided by you and the study coordinator. We will first collect a blood sample to determine if you are eligible for the study. If eligible, you will be randomly assigned to a powdered meal replacement group or control group. Participants in the powdered meal replacement group will add the meal replacement to their diets twice daily for 12 weeks. Participants in the control group will maintain their usual food intake. The meal replacement is neutral tasting powder which you will add to water and drink. The study coordinator will show you how to do this. Besides from taking the meal replacement, no other lifestyle changes are needed and maintain your normal medication regime and physical activity level is required. You must inform study staff if you make any changes to your current medication or nutritional supplement use. You cannot participate in the study if you take any natural health products which may

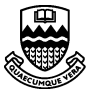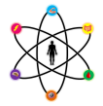

alter inflammation, gut microbiome, energy metabolism, body weight and composition, or hormone levels. You should also continue to eat your normal diet. You will weigh yourself daily during the study using a scale we will give you. It is important that you do not lose or gain weight during the study. If this happens you will meet with a registered dietitian to adjust your food intake. Over 12 weeks we will collect three blood samples to measure the level of inflammation, different hormones, genes related to nutrient metabolism and gene expression, fat, and sugar in your blood. We will also collect three stool samples to study the microbes living in your gut and three urine samples to study the substances you consumed with the meal replacement (only if you are in the powdered meal replacement group). You will also complete different questionnaires that ask you about your food intake and level of physical activity. Moreover, for the powdered meal replacement group, you will answer questionnaires about how hungry or full you feel.

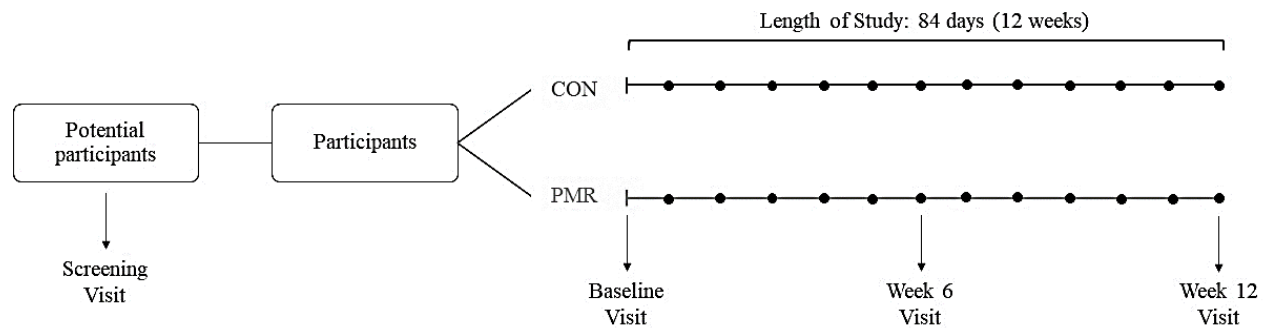

**Screening visit:** Sign “Informed Consent Form”, fasting blood draw, complete questionnaires (personal information, health status, and physical activity), anthropometric and body composition assessments.

**Visits at baseline and week 6:** Participants in PMR group collect nutritional supplement packages.

**Intervention visits (baseline, week 6, and week 12):** 1-hour WBCU test, fasting blood draw, urine (PMR group) and stool sample collection, body composition assessment, physical activity questionnaire.

• **Weekly:** Phone call to verify compliance, participants send 1-day dietary record, body weight and appetite sensation (PMR group). On the weeks 1, 6 and 12 there will be 3-day dietary record instead of 1-day dietary record.

Figure: Study design.

### Visit 1 – Screening (about 1 hour):

This visit will happen in the morning. For this visit you should not consume alcohol for 3 days and not eat or drink for 12 hours before the visit. You may drink water. First, the study coordinator will explain the study to you. If you are interested in participating, you will be asked to sign this consent form. Then trained personnel will collect 10 mL of your blood (2 teaspoons). This blood sample will help us determine if you are eligible to participate based on your liver, kidney and thyroid function, and hydration status. If one or more of these tests is outside the reference values for a healthy person, you will be notified and considered not eligible to participate in our study. You may not participate in this study if you are pregnant, the blood test will tell us if you are currently pregnant. During the study, those who are of childbearing potential, must practice adequate methods of birth control (e.g., total abstinence, hormonal birth control methods (oral, injectable, transdermal, or intra-vaginal), intrauterine devices, confirmed successful vasectomy of partner etc.). If you become pregnant over the duration of the study, you must stop taking



the product, and immediately inform the study investigators. You will also answer questions related to personal characteristics, health status and physical activity. We will measure your height, weight, and waist circumference. We will also measure the fat in your body using bioelectrical impedance analysis (BIA). You will lie down on a bed and eight self-adhesive electrodes will be connected to both of your hands and feet. You will not feel anything, and the procedure will take 1 to 2 minutes. Or you will be asked to stand on a scale with the ball and the heel of each foot in contact with four metal electrodes. This measurement will take no more than 15 seconds. At the end of this visit we will offer to you a snack and a beverage. Once we test your blood, we will contact you to let you know if you are eligible. If so, you will be randomly assigned to a powdered meal replacement group or control group and we will schedule your second visit.

### *Visit 2 (about 3 hours):*

This visit will also happen in the morning. For this visit, you should not consume alcohol for 3 days and not eat or drink for 12 hours before the visit. You may drink water. You should not exercise 24 hours before this visit and do as little activity as possible before the visit. For example, taking the elevator instead of the stairs.

At the beginning of this visit we will estimate how many calories you burn during a day using the whole-body calorimetry unit (WBCU). The WBCU is similar to a small hotel room. It has a bed, armchair, table, sink, toilet, television, computer/internet and treadmill. You will lie in a relaxed position on a bed. You will breathe regularly and relax without falling asleep. The test will take about 1 hour.

Then, we will measure the fat and muscle in your body using 3 safe and routine techniques. The first technique is a dual energy X-ray absorptiometry [DXA] scan, which may happen in a different day than the visit but in the same week or as close as possible. Before the scan we will make sure it is safe for you by asking some questions. If you are a woman, we will test your blood sample to see if you are pregnant. Pregnant women will not be allowed to participate in this study. During the scan you will lie down on a bed and the technician will position you correctly. The equipment “arm” will pass over your body and it will not cause any discomfort to you. It will take about 20 minutes to finish this test. The second technique is air displacement plethysmography (ADP). During this test you will sit comfortably inside a chamber and stay relaxed and quiet for 1 minute. This will happen twice. The entire test will take about 5 minutes. For this test, you will need to wear minimal, form-fitting clothing and a swim-cap. The last technique is the BIA, you will lie down on a bed and eight electrodes will be connected to both of your hands and feet. You will not feel anything, and the procedure will take 1 to 2 minutes.

After these assessments, certified personnel will collect 24 mL of your blood (5 teaspoons) to assess your level of inflammation, hormones, the interaction between your genes and the diet, fat, and sugar in your blood. If you are in the powdered meal replacement group, you will also collect your urine (~1 cup) to assess the level of substances contained in the meal replacement.

Then, we will give you a snack to eat. You will then answer a physical activity questionnaire. The study coordinator will explain how to monitor your body weight and complete questionnaires for the study. These questionnaires will ask about how hungry and full you feel and the foods you eat.

We will also explain how to collect a stool sample at home using the kit provided. You can bring this stool sample back later the same day or the next day. Once we receive your first stool sample, the research coordinator will give to participants assigned to the powdered meal replacement group the





1  
2  
3 packages with the product and explain how to use it. The product will be mixed with water and taken  
4 twice daily as snacks in the morning and afternoon for 12 weeks (84 days). Lastly, the study coordinator  
5 will provide you with another stool collection kit.  
6  
7

### 8 *Visit 3 – Day 42 (about 3 hours):*

9  
10 This visit will happen in the morning and is similar to Visit 2, except genetic analyses, that will  
11 not be assessed. This means that the amount of blood we will collect will be 20 mL (4 teaspoons). For this  
12 visit, you should not consume alcohol for 3 days and not eat or drink for 12 hours before the visit. You  
13 may drink water. You should not exercise 24 hours before this visit and do as little activity as possible  
14 before the visit. During this visit we will complete the same assessments as Visit 2. You will also bring  
15 your stool sample to this visit. If you are unable to bring it to this visit, you can bring on the day before or  
16 after your scheduled appointment.  
17  
18

19 The study coordinator will check if your weight has changed from the beginning of the study and  
20 review your study journal. If your weight has changed the dietitian will work with you to adjust your diet  
21 to make sure your weight remains stable. At the end of the visit, the study coordinator will provide you  
22 with another stool collection kit. Participants in the powdered meal replacement group should keep taking  
23 the meal replacement mixed with water twice daily as snacks in the morning and afternoon until Visit 4.  
24 Participants in the control group will maintain their usual food intake.  
25  
26  
27

### 28 *Visit 4 – Day 84 (about 3 hours):*

29  
30 For this visit you will prepare as you did for Visit 2. This will be the last visit you will attend. For  
31 this visit you should bring back the scale provided during the study period and your final stool sample. As  
32 with the other stool sample collections, you are able to bring the sample to the visit, or the day before or  
33 after the scheduled visit. The study will have been completed at the end of this visit.  
34  
35

### 36 *Weekly Assessment / Communication:*

37  
38 At the beginning of the study, we will provide a study journal. This provides reminders of what  
39 needs to be done every day throughout the study. Daily and weekly tasks include weighing yourself and  
40 completing questionnaires. These questionnaires will be about how hungry and full you feel (only for  
41 participants assigned to the powdered meal replacement group) and the foods you eat. Before Visits 2, 3,  
42 and 4 you will complete an online questionnaire about the food you ate three days during the weeks of  
43 these study visits. This will include one weekend day and one weekday. For the other weeks of the study,  
44 you will complete one of these questionnaires each week. The study coordinator will call or email you  
45 each week. This is to make sure you are following the recommendations provided. You will also be asked  
46 about your daily weight measurements and reminded to complete your study journal.  
47  
48  
49  
50

### 51 *Results:*

52 You will learn how many calories you burn in a day. You will also receive information about the  
53 amount of fat, bone, and lean soft tissue (i.e., everything else, but fat and bone) in your body.  
54  
55  
56  
57  
58

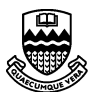

## Information about Investigational Product:

Serving Size: 8 tablespoons (50g)

Servings Per Container: 10

| Amount Per Serving              | % Daily Value* |
|---------------------------------|----------------|
| <b>Calories</b> 180             |                |
| Calories from Fat 9             |                |
| <b>Total Fat</b> 1.0g*          | <b>1.5%</b>    |
| Saturated Fat 0.5g*             | <b>2.5%</b>    |
| Trans Fat 0g                    | **             |
| Polyunsaturated Fat 0.1g        | **             |
| Monounsaturated Fat 0.4g        | **             |
| <b>Cholesterol</b> 3mg          | <b>1%</b>      |
| <b>Sodium</b> 340mg             | <b>15%</b>     |
| <b>Potassium</b> 500mg          | <b>14%</b>     |
| <b>Total Carbohydrates</b> 15g* | <b>6%</b>      |
| Dietary Fiber 0.5g*             | <b>2%</b>      |
| Sugars 15g                      | **             |
| <b>Protein</b> 27g*             | <b>54%</b>     |

|                             |      |
|-----------------------------|------|
| Vitamin A 794 IU            | 16%  |
| Vitamin C 16mg              | 27%  |
| Vitamin E 6 IU              | 20%  |
| Thiamin (Vitamin B1) .5mg   | 33%  |
| Riboflavin (Vitamin B2) 6mg | 350% |
| Vitamin B6 .7mg             | 35%  |
| Calcium 215mg               | 22%  |
| Iron 4.9mg                  | 27%  |

\* Percent Daily Values are based on a 2,000 calorie diet.

\*\* Daily Value not established.

### Essential and Potentially Essential

#### Amino Acid Content of Protein Ingredients

| Amino Acid   |        | Per Serving 50g |        |
|--------------|--------|-----------------|--------|
| L Tyrosine   | 950mg  | L Leucine       | 2300mg |
| L Methionine | 400mg  | L Isoleucine    | 1400mg |
| L Cystine    | 300mg  | L Valine        | 1400mg |
| L Lysine     | 1550mg | L Histidine     | 700mg  |
| L Threonine  | 950mg  | L Arginine      | 1800mg |
| L Tryptophan | 400mg  | L Phenylalanine | 1300mg |

**Ingredients:** Soy Protein Isolate, Honey, Skim Milk Yogurt Powder, Potassium Chloride, Magnesium Carbonate, Calcium Citrate, Vitamin C, Niacin, Color Additive: Riboflavin (Vitamin B2), Vitamin E, Zinc Oxide, Ferrous Fumarate, Manganese Sulfate, Calcium Pantothenate, Vitamin B2, Vitamin B6, Vitamin B1, Vitamin A, Folic Acid, Potassium Iodide, Sodium Selenite, Biotin, Vitamin D3, Vitamin B12



### What are the risks and discomforts?

There are no known risks of eating the meal replacement, there may be unknown risk with taking this investigational natural health product and potential side effects may include liver related drug adverse events. It is very unlikely to cause you any discomfort. The blood draws are a routine procedure performed by trained personnel. A needle will be inserted into a vein and blood will be withdrawn for lab tests. It is possible you may experience mild pain, fainting, bleeding, and bruising, and or an infection at the insertion site. Bruising is common, but usually goes away after a few days. Infection, dizziness, and fainting are rare during this procedure. There are no risks of having the genetic analysis, only potential general genetic linkages with metabolism of nutrients will be identified. You may also feel uncomfortable being alone in the WBCU. However, the tests will take only 1 hour and there will always be research staff close by and there is an intercom system to talk to them.

The X-ray dose associated with DXA scan is very low and not believed to have any long-term bad effects on your health. Pregnant women are excluded as a precaution. Having a DXA scan does not make it unsafe for you to have other X-rays in the future.

The BIA test is a risk for you only if you have a pacemaker or other internal electrical medical device. This is due to the risk of device malfunction from the weak electrical signal. Individuals with pacemakers or internal medical devices will not be able to participate in this study.

Dr. Laurie Mereu is a member of our research team and medical doctor. She will review your blood tests. If there are abnormal results Dr. Mereu will provide suggestions on how to proceed.

Risk of exposure to COVID-19 with your participation include exposure to others (research personnel and other participants) and increased time within our research unit. Measures undertaken to reduce this risk include ensuring all personnel and participants wear a mask, and frequent hand washing. All hard surfaces and common touched areas are disinfected before and after each visit. One-way traffic and physical distancing of 2 meters are encouraged at all times.

### What happens if I am injured because of this research?

If you become ill or injured as a result of being in this study, you will still be able to receive necessary medical treatment. This will occur at no additional cost to you. By signing this consent form, you are not releasing the investigators, institution, or sponsors from their legal and professional duties.

### What are the benefits to me?

There are no direct benefits to you for participating in this study. We hope the study will give us more information about how our bodies use the powdered meal replacement.

### Do I have to participate?

No. Taking part in this study is your choice. You may stop participating in the study at any time. You can withdraw by contacting a study coordinator. Phone number: (780) 492-9010.

### Will I be paid to be in the research?

After you complete the study, we will compensate your time with a \$300 honorarium. We will also give to you a parking pass in case you need to park your car in front of our clinic. There is no cost associated with participating.

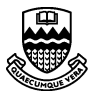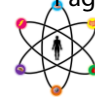

### Will my information be kept private?

During the study we will collect your health information. This will be kept private. We will not release information containing your name outside of the study investigators office. It will not be listed in the research when published. By law, we may have to release your information with your name so we cannot guarantee absolute privacy. However, we will make every legal effort to make sure that your health information is kept private.

During research studies it is important that the data we get is accurate. For this reason, your health data and name may be looked at by people from the University of Alberta auditors or members of the Research Ethics Board. By signing this consent form, you are giving permission for the study staff to collect your health information and use it for research purposes.

After the study is done, we will securely store your health data that was collected as part of the study. As per Health Canada requirements, your data will be stored and kept confidential for 15 years. If you leave the study, we will ask permission to keep your data. If you do not respond, we will use your data that had been collected so far.

If you leave the study, we will not collect any new information from you. However, we will keep the data that we have already collected, unless you specifically request it to be destroyed.

### What if I have questions?

If you have any questions about this research, please contact the principal investigator (Dr. Carla Prado at 780-492-7934) or the study coordinator (Julia Montenegro at 780-492-9010).

If you suffer a research related injury, please contact the study coordinator at this number as well.

If you have any questions about your rights as a research participant, you may contact the Health Research Ethics Board at 780-492-2615. This office is independent of the study investigators.

The study is being sponsored by the ALMASED WELLNESS GMBH, the company that makes the powdered meal replacement. If you need, you can request any details about this product from the Principal Investigator.

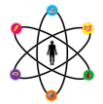

## CONSENT

**Title of Study:** The impact of a powdered meal replacement on metabolism and gut microbiota: a 12-week study in individuals with excessive body weight.

**Principal Investigators:**

|                 |                       |                                 |
|-----------------|-----------------------|---------------------------------|
| Dr. Carla Prado | Phone: (780) 492-7934 | E-mail: carla.prado@ualberta.ca |
| Dr. Jens Walter |                       | E-mail: jwalter1@ualberta.ca    |
| Dr. Arya Sharma |                       | E-mail: amsharm@ualberta.ca     |

**Qualified Investigator:**

|                  |                       |                                  |
|------------------|-----------------------|----------------------------------|
| Dr. Laurie Mereu | Phone: (780) 492-3626 | E-mail: laurie.mereu@ualberta.ca |
|------------------|-----------------------|----------------------------------|

**Study Manager:**

|                                       |                       |                             |
|---------------------------------------|-----------------------|-----------------------------|
| Camila Oliveira, Post-doctoral Fellow | Phone: (780) 492-9010 | E-mail: premium@ualberta.ca |
|---------------------------------------|-----------------------|-----------------------------|

**Study Coordinator:**

|                               |                       |                             |
|-------------------------------|-----------------------|-----------------------------|
| Julia Montenegro, PhD Student | Phone: (780) 492-9010 | E-mail: premium@ualberta.ca |
|-------------------------------|-----------------------|-----------------------------|

By signing below, you understand:

- That you have read the above information and have had anything that you do not understand explained to you to your satisfaction.
- That you will be taking part in a research study.
- That you read and received a copy of the attached Information Sheet.
- The benefits and risks involved in taking part in this research study.
- That you are free to leave the study at any time, without having to give a reason and without affecting your future medical care.
- Who will have access to your records, including personally identifiable health information.

Who explained this study to you? \_\_\_\_\_

Signature of Research Participant \_\_\_\_\_

(Printed Name) \_\_\_\_\_

Date: \_\_\_\_\_

I believe that the person signing this form understands what is involved in the study and voluntarily agrees to participate.

Signature of Investigator or Designee \_\_\_\_\_ Date \_\_\_\_\_

THE INFORMATION SHEET MUST BE ATTACHED TO THIS CONSENT FORM AND A SIGNED COPY GIVEN TO THE RESEARCH PARTICIPANT.

# Reporting checklist for protocol of a clinical trial.

Based on the SPIRIT guidelines.

## Instructions to authors

Complete this checklist by entering the page numbers from your manuscript where readers will find each of the items listed below.

Your article may not currently address all the items on the checklist. Please modify your text to include the missing information. If you are certain that an item does not apply, please write "n/a" and provide a short explanation.

Upload your completed checklist as an extra file when you submit to a journal.

In your methods section, say that you used the SPIRIT reporting guidelines, and cite them as:

Chan A-W, Tetzlaff JM, Gøtzsche PC, Altman DG, Mann H, Berlin J, Dickersin K, Hróbjartsson A, Schulz KF, Parulekar WR, Krleža-Jerić K, Laupacis A, Moher D. SPIRIT 2013 Explanation and Elaboration: Guidance for protocols of clinical trials. *BMJ*. 2013;346:e7586

|                                   | Reporting Item                                                                                                                  | Page Number |
|-----------------------------------|---------------------------------------------------------------------------------------------------------------------------------|-------------|
| <b>Administrative information</b> |                                                                                                                                 |             |
| Title                             | <a href="#">#1</a> Descriptive title identifying the study design, population, interventions, and, if applicable, trial acronym | 1           |
| Trial registration                | <a href="#">#2a</a> Trial identifier and registry name. If not yet                                                              | 2, 6, 17    |

|    |                     |                                                                             |          |
|----|---------------------|-----------------------------------------------------------------------------|----------|
| 1  |                     | registered, name of intended registry                                       |          |
| 2  |                     |                                                                             |          |
| 3  |                     |                                                                             |          |
| 4  | Trial registration: | <a href="#">#2b</a> All items from the World Health Organization Trial      | 6        |
| 5  |                     |                                                                             |          |
| 6  | data set            | Registration Data Set                                                       |          |
| 7  |                     |                                                                             |          |
| 8  |                     |                                                                             |          |
| 9  | Protocol version    | <a href="#">#3</a> Date and version identifier                              | 2, 5, 17 |
| 10 |                     |                                                                             |          |
| 11 |                     |                                                                             |          |
| 12 | Funding             | <a href="#">#4</a> Sources and types of financial, material, and other      | 18-19    |
| 13 |                     |                                                                             |          |
| 14 |                     | support                                                                     |          |
| 15 |                     |                                                                             |          |
| 16 |                     |                                                                             |          |
| 17 | Roles and           | <a href="#">#5a</a> Names, affiliations, and roles of protocol contributors | 1, 18    |
| 18 |                     |                                                                             |          |
| 19 | responsibilities:   |                                                                             |          |
| 20 |                     |                                                                             |          |
| 21 | contributorship     |                                                                             |          |
| 22 |                     |                                                                             |          |
| 23 |                     |                                                                             |          |
| 24 |                     |                                                                             |          |
| 25 | Roles and           | <a href="#">#5b</a> Name and contact information for the trial sponsor      | 18       |
| 26 |                     |                                                                             |          |
| 27 | responsibilities:   |                                                                             |          |
| 28 |                     |                                                                             |          |
| 29 | sponsor contact     |                                                                             |          |
| 30 |                     |                                                                             |          |
| 31 | information         |                                                                             |          |
| 32 |                     |                                                                             |          |
| 33 |                     |                                                                             |          |
| 34 |                     |                                                                             |          |
| 35 | Roles and           | <a href="#">#5c</a> Role of study sponsor and funders, if any, in study     | 18       |
| 36 |                     |                                                                             |          |
| 37 | responsibilities:   | design; collection, management, analysis, and                               |          |
| 38 |                     |                                                                             |          |
| 39 | sponsor and funder  | interpretation of data; writing of the report; and the                      |          |
| 40 |                     |                                                                             |          |
| 41 |                     | decision to submit the report for publication, including                    |          |
| 42 |                     |                                                                             |          |
| 43 |                     | whether they will have ultimate authority over any of                       |          |
| 44 |                     |                                                                             |          |
| 45 |                     | these activities                                                            |          |
| 46 |                     |                                                                             |          |
| 47 |                     |                                                                             |          |
| 48 |                     |                                                                             |          |
| 49 | Roles and           | <a href="#">#5d</a> Composition, roles, and responsibilities of the         | 18       |
| 50 |                     |                                                                             |          |
| 51 | responsibilities:   | coordinating centre, steering committee, endpoint                           |          |
| 52 |                     |                                                                             |          |
| 53 | committees          | adjudication committee, data management team, and                           |          |
| 54 |                     |                                                                             |          |
| 55 |                     | other individuals or groups overseeing the trial, if                        |          |
| 56 |                     |                                                                             |          |
| 57 |                     |                                                                             |          |
| 58 |                     |                                                                             |          |
| 59 |                     |                                                                             |          |
| 60 |                     |                                                                             |          |

1 applicable (see Item 21a for data monitoring

2  
3 committee)

4  
5  
6 **Introduction**

7  
8  
9 Background and [#6a](#) Description of research question and justification for 4-5  
10  
11 rationale undertaking the trial, including summary of relevant  
12  
13 studies (published and unpublished) examining  
14  
15 benefits and harms for each intervention

16  
17  
18  
19 Background and [#6b](#) Explanation for choice of comparators 5  
20  
21 rationale: choice of  
22  
23 comparators

24  
25  
26 Objectives [#7](#) Specific objectives or hypotheses 5

27  
28  
29 Trial design [#8](#) Description of trial design including type of trial (eg, 5-6  
30  
31 parallel group, crossover, factorial, single group),  
32  
33 allocation ratio, and framework (eg, superiority,  
34  
35 equivalence, non-inferiority, exploratory)

36  
37  
38  
39 **Methods:**

40  
41 **Participants,**  
42  
43 **interventions, and**  
44  
45 **outcomes**

46  
47  
48  
49 Study setting [#9](#) Description of study settings (eg, community clinic, 5  
50  
51 academic hospital) and list of countries where data  
52  
53 will be collected. Reference to where list of study  
54  
55 sites can be obtained  
56  
57



|    |                      |                      |                                                        |     |
|----|----------------------|----------------------|--------------------------------------------------------|-----|
| 1  | Eligibility criteria | <a href="#">#10</a>  | Inclusion and exclusion criteria for participants. If  | 7   |
| 2  |                      |                      |                                                        |     |
| 3  |                      |                      | applicable, eligibility criteria for study centres and |     |
| 4  |                      |                      | individuals who will perform the interventions (eg,    |     |
| 5  |                      |                      | surgeons, psychotherapists)                            |     |
| 6  |                      |                      |                                                        |     |
| 7  |                      |                      |                                                        |     |
| 8  |                      |                      |                                                        |     |
| 9  |                      |                      |                                                        |     |
| 10 |                      |                      |                                                        |     |
| 11 | Interventions:       | <a href="#">#11a</a> | Interventions for each group with sufficient detail to | 8   |
| 12 |                      |                      |                                                        |     |
| 13 | description          |                      | allow replication, including how and when they will be |     |
| 14 |                      |                      | administered                                           |     |
| 15 |                      |                      |                                                        |     |
| 16 |                      |                      |                                                        |     |
| 17 |                      |                      |                                                        |     |
| 18 |                      |                      |                                                        |     |
| 19 | Interventions:       | <a href="#">#11b</a> | Criteria for discontinuing or modifying allocated      | 15  |
| 20 |                      |                      | interventions for a given trial participant (eg, drug  |     |
| 21 | modifications        |                      | dose change in response to harms, participant          |     |
| 22 |                      |                      | request, or improving / worsening disease)             |     |
| 23 |                      |                      |                                                        |     |
| 24 |                      |                      |                                                        |     |
| 25 |                      |                      |                                                        |     |
| 26 |                      |                      |                                                        |     |
| 27 |                      |                      |                                                        |     |
| 28 |                      |                      |                                                        |     |
| 29 | Interventions:       | <a href="#">#11c</a> | Strategies to improve adherence to intervention        | 15  |
| 30 |                      |                      |                                                        |     |
| 31 | adherence            |                      | protocols, and any procedures for monitoring           |     |
| 32 |                      |                      | adherence (eg, drug tablet return; laboratory tests)   |     |
| 33 |                      |                      |                                                        |     |
| 34 |                      |                      |                                                        |     |
| 35 |                      |                      |                                                        |     |
| 36 | Interventions:       | <a href="#">#11d</a> | Relevant concomitant care and interventions that are   | 15  |
| 37 |                      |                      |                                                        |     |
| 38 | concomitant care     |                      | permitted or prohibited during the trial               |     |
| 39 |                      |                      |                                                        |     |
| 40 |                      |                      |                                                        |     |
| 41 |                      |                      |                                                        |     |
| 42 | Outcomes             | <a href="#">#12</a>  | Primary, secondary, and other outcomes, including      | 6-7 |
| 43 |                      |                      |                                                        |     |
| 44 |                      |                      | the specific measurement variable (eg, systolic blood  |     |
| 45 |                      |                      | pressure), analysis metric (eg, change from baseline,  |     |
| 46 |                      |                      | final value, time to event), method of aggregation     |     |
| 47 |                      |                      | (eg, median, proportion), and time point for each      |     |
| 48 |                      |                      | outcome. Explanation of the clinical relevance of      |     |
| 49 |                      |                      | chosen efficacy and harm outcomes is strongly          |     |
| 50 |                      |                      | recommended                                            |     |
| 51 |                      |                      |                                                        |     |
| 52 |                      |                      |                                                        |     |
| 53 |                      |                      |                                                        |     |
| 54 |                      |                      |                                                        |     |
| 55 |                      |                      |                                                        |     |
| 56 |                      |                      |                                                        |     |
| 57 |                      |                      |                                                        |     |
| 58 |                      |                      |                                                        |     |
| 59 |                      |                      |                                                        |     |
| 60 |                      |                      |                                                        |     |

|    |                           |                      |                                                          |     |
|----|---------------------------|----------------------|----------------------------------------------------------|-----|
| 1  | Participant timeline      | <a href="#">#13</a>  | Time schedule of enrolment, interventions (including     | 8-9 |
| 2  |                           |                      | any run-ins and washouts), assessments, and visits       |     |
| 3  |                           |                      | for participants. A schematic diagram is highly          |     |
| 4  |                           |                      | recommended (see Figure)                                 |     |
| 5  |                           |                      |                                                          |     |
| 6  |                           |                      |                                                          |     |
| 7  |                           |                      |                                                          |     |
| 8  |                           |                      |                                                          |     |
| 9  |                           |                      |                                                          |     |
| 10 |                           |                      |                                                          |     |
| 11 | Sample size               | <a href="#">#14</a>  | Estimated number of participants needed to achieve       | 15  |
| 12 |                           |                      | study objectives and how it was determined,              |     |
| 13 |                           |                      | including clinical and statistical assumptions           |     |
| 14 |                           |                      | supporting any sample size calculations                  |     |
| 15 |                           |                      |                                                          |     |
| 16 |                           |                      |                                                          |     |
| 17 |                           |                      |                                                          |     |
| 18 |                           |                      |                                                          |     |
| 19 |                           |                      |                                                          |     |
| 20 |                           |                      |                                                          |     |
| 21 | Recruitment               | <a href="#">#15</a>  | Strategies for achieving adequate participant            | 8   |
| 22 |                           |                      | enrolment to reach target sample size                    |     |
| 23 |                           |                      |                                                          |     |
| 24 |                           |                      |                                                          |     |
| 25 |                           |                      |                                                          |     |
| 26 | <b>Methods:</b>           |                      |                                                          |     |
| 27 |                           |                      |                                                          |     |
| 28 | <b>Assignment of</b>      |                      |                                                          |     |
| 29 | <b>interventions (for</b> |                      |                                                          |     |
| 30 | <b>controlled trials)</b> |                      |                                                          |     |
| 31 |                           |                      |                                                          |     |
| 32 |                           |                      |                                                          |     |
| 33 |                           |                      |                                                          |     |
| 34 |                           |                      |                                                          |     |
| 35 |                           |                      |                                                          |     |
| 36 | Allocation: sequence      | <a href="#">#16a</a> | Method of generating the allocation sequence (eg,        | 8   |
| 37 | generation                |                      | computer-generated random numbers), and list of          |     |
| 38 |                           |                      | any factors for stratification. To reduce predictability |     |
| 39 |                           |                      | of a random sequence, details of any planned             |     |
| 40 |                           |                      | restriction (eg, blocking) should be provided in a       |     |
| 41 |                           |                      | separate document that is unavailable to those who       |     |
| 42 |                           |                      | enrol participants or assign interventions               |     |
| 43 |                           |                      |                                                          |     |
| 44 |                           |                      |                                                          |     |
| 45 |                           |                      |                                                          |     |
| 46 |                           |                      |                                                          |     |
| 47 |                           |                      |                                                          |     |
| 48 |                           |                      |                                                          |     |
| 49 |                           |                      |                                                          |     |
| 50 |                           |                      |                                                          |     |
| 51 |                           |                      |                                                          |     |
| 52 |                           |                      |                                                          |     |
| 53 | Allocation                | <a href="#">#16b</a> | Mechanism of implementing the allocation sequence        | 8   |
| 54 | concealment               |                      | (eg, central telephone; sequentially numbered,           |     |
| 55 |                           |                      | opaque, sealed envelopes), describing any steps to       |     |
| 56 |                           |                      |                                                          |     |
| 57 |                           |                      |                                                          |     |
| 58 |                           |                      |                                                          |     |
| 59 |                           |                      |                                                          |     |
| 60 |                           |                      |                                                          |     |

|    |                        |                                                                            |       |
|----|------------------------|----------------------------------------------------------------------------|-------|
| 1  |                        | conceal the sequence until interventions are                               |       |
| 2  |                        |                                                                            |       |
| 3  |                        | assigned                                                                   |       |
| 4  |                        |                                                                            |       |
| 5  |                        |                                                                            |       |
| 6  | Allocation:            | <a href="#">#16c</a> Who will generate the allocation sequence, who will   | 17-18 |
| 7  |                        |                                                                            |       |
| 8  | implementation         | enrol participants, and who will assign participants to                    |       |
| 9  |                        |                                                                            |       |
| 10 |                        | interventions                                                              |       |
| 11 |                        |                                                                            |       |
| 12 |                        |                                                                            |       |
| 13 | Blinding (masking)     | <a href="#">#17a</a> Who will be blinded after assignment to interventions | 3     |
| 14 |                        |                                                                            |       |
| 15 |                        | (eg, trial participants, care providers, outcome                           |       |
| 16 |                        |                                                                            |       |
| 17 |                        | assessors, data analysts), and how                                         |       |
| 18 |                        |                                                                            |       |
| 19 |                        |                                                                            |       |
| 20 |                        |                                                                            |       |
| 21 | Blinding (masking):    | <a href="#">#17b</a> If blinded, circumstances under which unblinding is   | n/a   |
| 22 |                        |                                                                            |       |
| 23 | emergency              | permissible, and procedure for revealing a                                 |       |
| 24 |                        |                                                                            |       |
| 25 | unblinding             | participant's allocated intervention during the trial                      |       |
| 26 |                        |                                                                            |       |
| 27 |                        |                                                                            |       |
| 28 |                        |                                                                            |       |
| 29 | <b>Methods: Data</b>   |                                                                            |       |
| 30 |                        |                                                                            |       |
| 31 | <b>collection,</b>     |                                                                            |       |
| 32 |                        |                                                                            |       |
| 33 | <b>management, and</b> |                                                                            |       |
| 34 |                        |                                                                            |       |
| 35 | <b>analysis</b>        |                                                                            |       |
| 36 |                        |                                                                            |       |
| 37 |                        |                                                                            |       |
| 38 |                        |                                                                            |       |
| 39 | Data collection plan   | <a href="#">#18a</a> Plans for assessment and collection of outcome,       | 8-15  |
| 40 |                        |                                                                            |       |
| 41 |                        | baseline, and other trial data, including any related                      |       |
| 42 |                        |                                                                            |       |
| 43 |                        | processes to promote data quality (eg, duplicate                           |       |
| 44 |                        |                                                                            |       |
| 45 |                        | measurements, training of assessors) and a                                 |       |
| 46 |                        |                                                                            |       |
| 47 |                        | description of study instruments (eg, questionnaires,                      |       |
| 48 |                        |                                                                            |       |
| 49 |                        | laboratory tests) along with their reliability and                         |       |
| 50 |                        |                                                                            |       |
| 51 |                        | validity, if known. Reference to where data collection                     |       |
| 52 |                        |                                                                            |       |
| 53 |                        | forms can be found, if not in the protocol                                 |       |
| 54 |                        |                                                                            |       |
| 55 |                        |                                                                            |       |
| 56 |                        |                                                                            |       |
| 57 |                        |                                                                            |       |
| 58 | Data collection plan:  | <a href="#">#18b</a> Plans to promote participant retention and complete   | 9/ 15 |
| 59 |                        |                                                                            |       |
| 60 |                        |                                                                            |       |

|    |                            |                      |                                                           |       |
|----|----------------------------|----------------------|-----------------------------------------------------------|-------|
| 1  | retention                  |                      | follow-up, including list of any outcome data to be       |       |
| 2  |                            |                      | collected for participants who discontinue or deviate     |       |
| 3  |                            |                      | from intervention protocols                               |       |
| 4  |                            |                      |                                                           |       |
| 5  |                            |                      |                                                           |       |
| 6  |                            |                      |                                                           |       |
| 7  |                            |                      |                                                           |       |
| 8  | Data management            | <a href="#">#19</a>  | Plans for data entry, coding, security, and storage,      | 17-18 |
| 9  |                            |                      | including any related processes to promote data           |       |
| 10 |                            |                      | quality (eg, double data entry; range checks for data     |       |
| 11 |                            |                      | values). Reference to where details of data               |       |
| 12 |                            |                      | management procedures can be found, if not in the         |       |
| 13 |                            |                      | protocol                                                  |       |
| 14 |                            |                      |                                                           |       |
| 15 |                            |                      |                                                           |       |
| 16 |                            |                      |                                                           |       |
| 17 |                            |                      |                                                           |       |
| 18 |                            |                      |                                                           |       |
| 19 |                            |                      |                                                           |       |
| 20 |                            |                      |                                                           |       |
| 21 |                            |                      |                                                           |       |
| 22 | Statistics: outcomes       | <a href="#">#20a</a> | Statistical methods for analysing primary and             | 15-17 |
| 23 |                            |                      | secondary outcomes. Reference to where other              |       |
| 24 |                            |                      | details of the statistical analysis plan can be found, if |       |
| 25 |                            |                      | not in the protocol                                       |       |
| 26 |                            |                      |                                                           |       |
| 27 |                            |                      |                                                           |       |
| 28 |                            |                      |                                                           |       |
| 29 |                            |                      |                                                           |       |
| 30 |                            |                      |                                                           |       |
| 31 |                            |                      |                                                           |       |
| 32 | Statistics: additional     | <a href="#">#20b</a> | Methods for any additional analyses (eg, subgroup         | n/a   |
| 33 | analyses                   |                      | and adjusted analyses)                                    |       |
| 34 |                            |                      |                                                           |       |
| 35 |                            |                      |                                                           |       |
| 36 |                            |                      |                                                           |       |
| 37 |                            |                      |                                                           |       |
| 38 | Statistics: analysis       | <a href="#">#20c</a> | Definition of analysis population relating to protocol    | 16-17 |
| 39 | population and             |                      | non-adherence (eg, as randomised analysis), and           |       |
| 40 | missing data               |                      | any statistical methods to handle missing data (eg,       |       |
| 41 |                            |                      | multiple imputation)                                      |       |
| 42 |                            |                      |                                                           |       |
| 43 |                            |                      |                                                           |       |
| 44 |                            |                      |                                                           |       |
| 45 |                            |                      |                                                           |       |
| 46 |                            |                      |                                                           |       |
| 47 | <b>Methods: Monitoring</b> |                      |                                                           |       |
| 48 |                            |                      |                                                           |       |
| 49 |                            |                      |                                                           |       |
| 50 |                            |                      |                                                           |       |
| 51 | Data monitoring:           | <a href="#">#21a</a> | Composition of data monitoring committee (DMC);           | 18    |
| 52 | formal committee           |                      | summary of its role and reporting structure;              |       |
| 53 |                            |                      | statement of whether it is independent from the           |       |
| 54 |                            |                      | sponsor and competing interests; and reference to         |       |
| 55 |                            |                      |                                                           |       |
| 56 |                            |                      |                                                           |       |
| 57 |                            |                      |                                                           |       |
| 58 |                            |                      |                                                           |       |
| 59 |                            |                      |                                                           |       |
| 60 |                            |                      |                                                           |       |

1 where further details about its charter can be found,  
 2  
 3 if not in the protocol. Alternatively, an explanation of  
 4  
 5 why a DMC is not needed  
 6  
 7

|    |                      |                      |                                                      |       |
|----|----------------------|----------------------|------------------------------------------------------|-------|
| 8  | Data monitoring:     | <a href="#">#21b</a> | Description of any interim analyses and stopping     | 17-18 |
| 9  |                      |                      |                                                      |       |
| 10 | interim analysis     |                      | guidelines, including who will have access to these  |       |
| 11 |                      |                      |                                                      |       |
| 12 |                      |                      | interim results and make the final decision to       |       |
| 13 |                      |                      |                                                      |       |
| 14 |                      |                      | terminate the trial                                  |       |
| 15 |                      |                      |                                                      |       |
| 16 |                      |                      |                                                      |       |
| 17 |                      |                      |                                                      |       |
| 18 | Harms                | <a href="#">#22</a>  | Plans for collecting, assessing, reporting, and      | 9     |
| 19 |                      |                      |                                                      |       |
| 20 |                      |                      | managing solicited and spontaneously reported        |       |
| 21 |                      |                      |                                                      |       |
| 22 |                      |                      | adverse events and other unintended effects of trial |       |
| 23 |                      |                      |                                                      |       |
| 24 |                      |                      | interventions or trial conduct                       |       |
| 25 |                      |                      |                                                      |       |
| 26 |                      |                      |                                                      |       |
| 27 |                      |                      |                                                      |       |
| 28 | Auditing             | <a href="#">#23</a>  | Frequency and procedures for auditing trial conduct, | 18    |
| 29 |                      |                      |                                                      |       |
| 30 |                      |                      | if any, and whether the process will be independent  |       |
| 31 |                      |                      |                                                      |       |
| 32 |                      |                      | from investigators and the sponsor                   |       |
| 33 |                      |                      |                                                      |       |
| 34 |                      |                      |                                                      |       |
| 35 | <b>Ethics and</b>    |                      |                                                      |       |
| 36 |                      |                      |                                                      |       |
| 37 | <b>dissemination</b> |                      |                                                      |       |
| 38 |                      |                      |                                                      |       |
| 39 |                      |                      |                                                      |       |
| 40 |                      |                      |                                                      |       |
| 41 | Research ethics      | <a href="#">#24</a>  | Plans for seeking research ethics committee /        | 17-18 |
| 42 |                      |                      |                                                      |       |
| 43 | approval             |                      | institutional review board (REC / IRB) approval      |       |
| 44 |                      |                      |                                                      |       |
| 45 |                      |                      |                                                      |       |
| 46 | Protocol             | <a href="#">#25</a>  | Plans for communicating important protocol           | 17    |
| 47 |                      |                      |                                                      |       |
| 48 | amendments           |                      | modifications (eg, changes to eligibility criteria,  |       |
| 49 |                      |                      |                                                      |       |
| 50 |                      |                      | outcomes, analyses) to relevant parties (eg,         |       |
| 51 |                      |                      |                                                      |       |
| 52 |                      |                      | investigators, REC / IRBs, trial participants, trial |       |
| 53 |                      |                      |                                                      |       |
| 54 |                      |                      | registries, journals, regulators)                    |       |
| 55 |                      |                      |                                                      |       |
| 56 |                      |                      |                                                      |       |
| 57 |                      |                      |                                                      |       |
| 58 |                      |                      |                                                      |       |
| 59 |                      |                      |                                                      |       |
| 60 |                      |                      |                                                      |       |

|    |                       |                      |                                                          |       |
|----|-----------------------|----------------------|----------------------------------------------------------|-------|
| 1  | Consent or assent     | <a href="#">#26a</a> | Who will obtain informed consent or assent from          | 5-6   |
| 2  |                       |                      |                                                          |       |
| 3  |                       |                      |                                                          |       |
| 4  |                       |                      | potential trial participants or authorised surrogates,   |       |
| 5  |                       |                      |                                                          |       |
| 6  |                       |                      | and how (see Item 32)                                    |       |
| 7  |                       |                      |                                                          |       |
| 8  |                       |                      |                                                          |       |
| 9  | Consent or assent:    | <a href="#">#26b</a> | Additional consent provisions for collection and use     | n/a   |
| 10 |                       |                      |                                                          |       |
| 11 | ancillary studies     |                      | of participant data and biological specimens in          |       |
| 12 |                       |                      |                                                          |       |
| 13 |                       |                      | ancillary studies, if applicable                         |       |
| 14 |                       |                      |                                                          |       |
| 15 |                       |                      |                                                          |       |
| 16 | Confidentiality       | <a href="#">#27</a>  | How personal information about potential and             | 17-18 |
| 17 |                       |                      |                                                          |       |
| 18 |                       |                      | enrolled participants will be collected, shared, and     |       |
| 19 |                       |                      |                                                          |       |
| 20 |                       |                      | maintained in order to protect confidentiality before,   |       |
| 21 |                       |                      |                                                          |       |
| 22 |                       |                      | during, and after the trial                              |       |
| 23 |                       |                      |                                                          |       |
| 24 |                       |                      |                                                          |       |
| 25 |                       |                      |                                                          |       |
| 26 | Declaration of        | <a href="#">#28</a>  | Financial and other competing interests for principal    | 19    |
| 27 |                       |                      |                                                          |       |
| 28 | interests             |                      | investigators for the overall trial and each study site  |       |
| 29 |                       |                      |                                                          |       |
| 30 |                       |                      |                                                          |       |
| 31 |                       |                      |                                                          |       |
| 32 | Data access           | <a href="#">#29</a>  | Statement of who will have access to the final trial     | 17-19 |
| 33 |                       |                      |                                                          |       |
| 34 |                       |                      | dataset, and disclosure of contractual agreements        |       |
| 35 |                       |                      |                                                          |       |
| 36 |                       |                      | that limit such access for investigators                 |       |
| 37 |                       |                      |                                                          |       |
| 38 |                       |                      |                                                          |       |
| 39 | Ancillary and post    | <a href="#">#30</a>  | Provisions, if any, for ancillary and post-trial care,   | n/a   |
| 40 |                       |                      |                                                          |       |
| 41 | trial care            |                      | and for compensation to those who suffer harm from       |       |
| 42 |                       |                      |                                                          |       |
| 43 |                       |                      | trial participation                                      |       |
| 44 |                       |                      |                                                          |       |
| 45 |                       |                      |                                                          |       |
| 46 |                       |                      |                                                          |       |
| 47 | Dissemination         | <a href="#">#31a</a> | Plans for investigators and sponsor to communicate       | 17-18 |
| 48 |                       |                      |                                                          |       |
| 49 | policy: trial results |                      | trial results to participants, healthcare professionals, |       |
| 50 |                       |                      |                                                          |       |
| 51 |                       |                      | the public, and other relevant groups (eg, via           |       |
| 52 |                       |                      |                                                          |       |
| 53 |                       |                      | publication, reporting in results databases, or other    |       |
| 54 |                       |                      |                                                          |       |
| 55 |                       |                      | data sharing arrangements), including any                |       |
| 56 |                       |                      |                                                          |       |
| 57 |                       |                      |                                                          |       |
| 58 |                       |                      |                                                          |       |
| 59 |                       |                      |                                                          |       |
| 60 |                       |                      |                                                          |       |

publication restrictions

1  
2  
3  
4 Dissemination [#31b](#) Authorship eligibility guidelines and any intended use 18  
5  
6 policy: authorship of professional writers  
7

8  
9 Dissemination [#31c](#) Plans, if any, for granting public access to the full n/a  
10  
11 policy: reproducible protocol, participant-level dataset, and statistical  
12  
13 research code  
14  
15

## 16 Appendices

17  
18  
19 Informed consent [#32](#) Model consent form and other related documentation Supplementary  
20  
21 materials given to participants and authorised surrogates material  
22  
23  
24

25 Biological [#33](#) Plans for collection, laboratory evaluation, and 11-13  
26  
27 specimens storage of biological specimens for genetic or  
28  
29 molecular analysis in the current trial and for future  
30  
31 use in ancillary studies, if applicable  
32  
33  
34

35 The SPIRIT Explanation and Elaboration paper is distributed under the terms of the Creative  
36  
37 Commons Attribution License CC-BY-NC. This checklist was completed on 09. November 2022 using  
38  
39 <https://www.goodreports.org/>, a tool made by the [EQUATOR Network](#) in collaboration with  
40  
41 [Penelope.ai](#)  
42  
43  
44  
45  
46  
47  
48  
49  
50  
51  
52  
53  
54  
55  
56  
57  
58  
59  
60

# BMJ Open

## The Impact of a Powdered Meal Replacement on Metabolism and Gut Microbiota (PREMIUM) in Individuals with Excessive Body Weight: A Study Protocol for a Randomized Controlled Trial

|                                 |                                                                                                                                                                                                                                                                                                                                                                                                                                                                                                                                                                                                                                                                                                                                                                                                                                                                                                                                                                                                                                                                                                                                                                                                                                                                                                                                                                                                                        |
|---------------------------------|------------------------------------------------------------------------------------------------------------------------------------------------------------------------------------------------------------------------------------------------------------------------------------------------------------------------------------------------------------------------------------------------------------------------------------------------------------------------------------------------------------------------------------------------------------------------------------------------------------------------------------------------------------------------------------------------------------------------------------------------------------------------------------------------------------------------------------------------------------------------------------------------------------------------------------------------------------------------------------------------------------------------------------------------------------------------------------------------------------------------------------------------------------------------------------------------------------------------------------------------------------------------------------------------------------------------------------------------------------------------------------------------------------------------|
| Journal:                        | <i>BMJ Open</i>                                                                                                                                                                                                                                                                                                                                                                                                                                                                                                                                                                                                                                                                                                                                                                                                                                                                                                                                                                                                                                                                                                                                                                                                                                                                                                                                                                                                        |
| Manuscript ID                   | bmjopen-2022-070027.R2                                                                                                                                                                                                                                                                                                                                                                                                                                                                                                                                                                                                                                                                                                                                                                                                                                                                                                                                                                                                                                                                                                                                                                                                                                                                                                                                                                                                 |
| Article Type:                   | Protocol                                                                                                                                                                                                                                                                                                                                                                                                                                                                                                                                                                                                                                                                                                                                                                                                                                                                                                                                                                                                                                                                                                                                                                                                                                                                                                                                                                                                               |
| Date Submitted by the Author:   | 15-Aug-2023                                                                                                                                                                                                                                                                                                                                                                                                                                                                                                                                                                                                                                                                                                                                                                                                                                                                                                                                                                                                                                                                                                                                                                                                                                                                                                                                                                                                            |
| Complete List of Authors:       | Montenegro, Julia; University of Alberta, Department of Agricultural, Food, and Nutritional Science<br>L. P. Oliveira, Camila ; University of Alberta, Department of Agricultural, Food and Nutritional Science<br>Armet, Anissa M.; University of Alberta, Department of Agricultural, Food and Nutritional Science<br>Berg, Aloys; University of Freiburg, Faculty of Medicine<br>Sharma, Arya; University of Alberta, Department of Medicine<br>Mereu, Laurie; University of Alberta, Department of Medicine<br>Cominetti, Cristiane; Universidade Federal de Goias, Faculdade de Nutrição<br>Ghosh, Sunita; University of Alberta, Department of Oncology<br>Richard, Caroline; University of Alberta, Department of Agricultural, Food and Nutritional Science<br>Nguyen, Nguyen ; Universite catholique de Louvain, Metabolism and Nutrition research group (MNUT); Walloon Excellence in Lifesciences and Biotechnology, WELBIO department<br>Cani, Patrice; Universite catholique de Louvain, Metabolism and Nutrition research group (MNUT); Walloon Excellence in Lifesciences and Biotechnology, WELBIO department<br>Walter, Jens; University of Alberta, Department of Agricultural, Food and Nutritional Science; University College Cork, APC Microbiome Ireland, School of Microbiology, and Department of Medicine<br>Prado, Carla; University of Alberta, Agricultural Food and Nutritional Sciences |
| <b>Primary Subject Heading</b>: | Nutrition and metabolism                                                                                                                                                                                                                                                                                                                                                                                                                                                                                                                                                                                                                                                                                                                                                                                                                                                                                                                                                                                                                                                                                                                                                                                                                                                                                                                                                                                               |
| Secondary Subject Heading:      | Genetics and genomics, Immunology (including allergy), Research methods                                                                                                                                                                                                                                                                                                                                                                                                                                                                                                                                                                                                                                                                                                                                                                                                                                                                                                                                                                                                                                                                                                                                                                                                                                                                                                                                                |
| Keywords:                       | NUTRITION & DIETETICS, MICROBIOLOGY, IMMUNOLOGY, Obesity                                                                                                                                                                                                                                                                                                                                                                                                                                                                                                                                                                                                                                                                                                                                                                                                                                                                                                                                                                                                                                                                                                                                                                                                                                                                                                                                                               |
|                                 |                                                                                                                                                                                                                                                                                                                                                                                                                                                                                                                                                                                                                                                                                                                                                                                                                                                                                                                                                                                                                                                                                                                                                                                                                                                                                                                                                                                                                        |



1  
2  
3  
4  
5  
6  
7  
8  
9  
10  
11  
12  
13  
14  
15  
16  
17  
18  
19  
20  
21  
22  
23  
24  
25  
26  
27  
28  
29  
30  
31  
32  
33  
34  
35  
36  
37  
38  
39  
40  
41  
42  
43  
44  
45  
46  
47  
48  
49  
50  
51  
52  
53  
54  
55  
56  
57  
58  
59  
60



1  
2  
3 1 **The Impact of a Powdered Meal Replacement on Metabolism and Gut Microbiota**  
4  
5 2 **(PREMIUM) in Individuals with Excessive Body Weight: A Study Protocol for a**  
6  
7 3 **Randomized Controlled Trial**  
8  
9

10 4 Julia Montenegro<sup>1\*</sup>, Camila L. P. Oliveira<sup>1\*</sup>, Anissa M. Armet<sup>1</sup>, Aloys Berg<sup>2</sup>, Arya M.  
11  
12 5 Sharma<sup>3</sup>, Laurie Mereu<sup>3</sup>, Cristiane Cominetti<sup>4</sup>, Sunita Ghosh<sup>5</sup>, Caroline Richard<sup>1</sup>, Nguyen K.  
13  
14 6 Nguyen<sup>6,7</sup>, Patrice D. Cani<sup>6,7</sup>, Jens Walter<sup>1,8\*</sup>, Carla M. Prado<sup>1\*</sup>  
15  
16  
17  
18 7

19  
20 8 <sup>1</sup>Department of Agricultural, Food and Nutritional Science, University of Alberta, Edmonton,  
21  
22 9 AB, Canada.

23  
24 10 <sup>2</sup>Faculty of Medicine, University of Freiburg, Freiburg, Germany.

25  
26 11 <sup>3</sup>Department of Medicine, University of Alberta, Edmonton, AB, Canada.

27  
28 12 <sup>4</sup>Faculty of Nutrition, Federal University of Goiás, Goiânia, GO, Brazil.

29  
30 13 <sup>5</sup>Department of Medical Oncology, University of Alberta, Edmonton, AB, Canada.

31  
32 14 <sup>6</sup>Metabolism and Nutrition research group (MNUT), UCLouvain, Université catholique de  
33  
34 15 Louvain, Louvain Drug Research Institute, 1200 Brussels, Belgium

35  
36 16 <sup>7</sup>Walloon Excellence in Life Sciences and BIOTEchnology (WELBIO), WELBIO department,  
37  
38 17 WEL Research Institute, avenue Pasteur, 6, 1300 Wavre, Belgium

39  
40 18 <sup>8</sup>APC Microbiome Ireland, School of Microbiology, and Department of Medicine, University  
41  
42 19 College Cork – National University of Ireland, Cork, Ireland.

43  
44 20 \* Authors contributed equally.

45  
46 21 \* Co-corresponding authors: carla.prado@ualberta.ca and jenswalter@ucc.ie.  
47  
48  
49  
50  
51  
52  
53  
54  
55  
56  
57  
58  
59  
60

**22 ABSTRACT**

23 *Introduction:* Excess body weight is associated with a state of low-grade chronic inflammation  
24 and alterations of the gut microbiome. Powdered meal replacements (PMR) have been shown  
25 to be an effective strategy for weight management; however, their effect on inflammation and  
26 the gut microbiome remains unclear. The aim of this 12-week randomized control clinical trial  
27 is to investigate the effects of PMR consumption, here given as a soy-yogurt-honey formula,  
28 on inflammation, gut microbiome, and overall metabolism in individuals with excessive body  
29 weight.

30 *Methods and analysis:* Healthy adults with excess body weight (n=88) are being recruited and  
31 randomly assigned to one of the following groups: a) Control group (CON): maintaining usual  
32 diet for 12 weeks, or b) PMR group: replacing morning and afternoon snacks daily with a PMR  
33 for 12 weeks. Participants are asked to maintain body weight throughout the study and fill out  
34 a journal with information about PMR consumption, body weight, food intake, appetite  
35 sensations, and medications. Three study visits are required: baseline, week 6, and week 12.  
36 Outcome measures include systemic inflammatory biomarkers, gut microbiome composition,  
37 metabolic blood markers, host energy metabolism, body composition, appetite sensations, and  
38 host gene expression profile.

39 *Ethics and dissemination:* This research protocol was approved by the University of Alberta  
40 Ethics Board (Pro00070712) and adheres to the Canadian Tri-Council Policy statement on the  
41 use of human participants in research. Procedures and potential risks are fully discussed with  
42 participants. Study findings will be disseminated in peer-reviewed journals, conference  
43 presentations, and social media.

44 *Registration details:* ClinicalTrials.gov identifier: NCT03235804.

46 **Keywords:** Powdered meal replacement; obesity; inflammation; gut microbiome.

1  
2  
3 47  
45  
6 48 **ARTICLE SUMMARY**7  
8 49 **Strengths and Limitations of this study**

- 9
- 10 50 • The randomized controlled clinical trial design, coupled with regular assessments and
- 11 follow-up sessions, as well as a comprehensive range of evaluated outcomes,
- 12 51 effectively reduces biases and confounding factors.
- 13 52
- 14 53 • Cutting edge technology, such as the metabolic chamber and dual-energy X-ray
- 15 54 absorptiometry, enables precise outcome measures.
- 16 55
- 17 56 • The exploratory multi-omics approach, incorporating gut microbiome, gene expression,
- 18 57 and genetic polymorphisms, supports the progress of precision nutrition by generating
- 19 58 hypothesis.
- 20 59
- 21 60 • A primary limitation of the study is the absence of a placebo group and the fact it is not
- 22 61 not double-blinded.
- 23 62
- 24 63 • Since the gut microbiome analysis depends on fecal samples, it might not fully
- 25 64 represent changes in the gut microbiome composition occurring in more proximal parts
- 26 65 of the gastrointestinal tract.
- 27 66
- 28 67
- 29 68
- 30 69
- 31 70
- 32
- 33
- 34
- 35
- 36
- 37
- 38
- 39
- 40
- 41
- 42
- 43
- 44
- 45
- 46
- 47
- 48
- 49
- 50
- 51
- 52
- 53
- 54
- 55
- 56
- 57
- 58
- 59
- 60

64 **Word-count:** 5115 words.

## 65 INTRODUCTION

66 Excess body weight can be defined as a body mass index (BMI)  $\geq 25.0$  kg/m<sup>2</sup> (1), which  
67 encompasses both the overweight and obesity categories (2). This condition has been  
68 associated with a state of systemic low-grade chronic inflammation, which is characterized by  
69 a persistent activation of immune and non-immune cells and production of cytokines,  
70 chemokines, and acute phase proteins (3, 4). Those inflammatory biomarkers include  
71 interleukins (IL), such as IL-6 and IL-8, tumor necrosis factor- $\alpha$  (TNF- $\alpha$ ), and C-reactive  
72 protein (CRP) (3). Systemic low-grade chronic inflammation causes tissue and organ damage,  
73 which can, in turn, lead to the onset and progression of chronic diseases, such as diabetes  
74 mellitus, cancer, metabolic syndrome, and cardiovascular diseases (3).

75 In individuals with excessive body weight, the state of systemic low-grade chronic  
76 inflammation can be mediated by increased adiposity, as well as by mechanisms through the  
77 gut microbiota (3). Increased adipocyte size (i.e., hypertrophy) is associated with cellular  
78 dysfunction and distress (5, 6). Hypertrophic adipocytes secrete an increased number of pro-  
79 inflammatory chemokines, such as TNF- $\alpha$ , IL-6, IL-8, and monocyte chemoattractant protein  
80 1 (MCP-1) (4-6). The increased size of adipocytes and cytokine production lead to adipose  
81 tissue hypoxia and death, as well as local and systemic inflammation (4-6).

82 Excess body weight is associated with altered gut microbiome composition and reduced  
83 microbiome diversity, which might cause metabolic aberrations and enrich for opportunistic  
84 pathogens (e.g. at the epithelial interface) that contribute to inflammation (7, 8). Individuals  
85 with excessive body weight usually present with altered gut permeability, which elevates  
86 systemic levels of endotoxins (i.e., lipopolysaccharides) (3). When in the bloodstream,  
87 lipopolysaccharides binds to toll-like receptor 4 leading to activation of nuclear factor kappa B  
88 and consequently production of pro-inflammatory cytokines, including IL-6 and TNF- $\alpha$  (8).

1  
2  
3 89 Considering the numerous negative health outcomes associated with excess body  
4  
5 90 weight, much effort has been made to develop effective weight management strategies. Among  
6  
7 91 those are meal replacements, which are food products fortified with vitamins and minerals used  
8  
9 92 to replace one or more meals per day. Meal replacements are commonly used in association  
10  
11 93 with calorie restriction. Research has shown that the consumption of meal replacements leads  
12  
13 94 to greater weight loss when compared to reduced-calorie diets alone (9, 10). Improvement in  
14  
15 95 metabolic parameters is generally observed with weight loss, including improvement in  
16  
17 96 glucose metabolism, reduction of triacylglycerol, low-density lipoprotein cholesterol (LDL-C),  
18  
19 97 systolic blood pressure (9, 11, 12), and the inflammatory markers CRP and IL-6 (13).  
20  
21 98 Considering the positive health effects of weight loss in individuals with excessive body weight  
22  
23 99 (14-16) and the beneficial health effects of meal replacements (9, 11), it is important to  
24  
25 100 differentiate the effects of meal replacements from that of weight loss on overall health, which  
26  
27 101 have not been investigated so far. Therefore, the aim of this study is to compare the effects of  
28  
29 102 a 12-week consumption of a powdered meal replacement (PMR group), given as a soy-yogurt-  
30  
31 103 honey formula (17), versus usual diet (control group, CON) on inflammation, gut microbiome,  
32  
33 104 overall metabolic health, gene expression profile, and genetic background in individuals with  
34  
35 105 excessive body weight who are in weight maintenance.  
36  
37  
38  
39  
40  
41  
42  
43  
44  
45  
46  
47  
48  
49  
50  
51  
52  
53  
54  
55  
56  
57  
58  
59  
60

## 107 **METHODS**

### 108 **Study design and ethical procedures**

109 This study is a randomized, controlled, parallel group, clinical trial conducted at the  
110 Human Nutrition Research Unit (HNRU), University of Alberta (Edmonton, AB, Canada). The  
111 study is an Investigator Initialized Trial sponsored by the Almased Wellness Comp.,  
112 Bienenbüttel, Germany. The corresponding research protocol fulfils the requirements of the  
113 Standard Protocol Items: Recommendations for Interventional Trials (SPIRIT) checklist (18).

1  
2  
3 114 This research protocol was approved by the University of Alberta Ethics Board (HREB,  
4  
5 115 identifier Pro00070712) and complies with the standards established by the Canadian Tri-  
6  
7  
8 116 Council Policy statement on the use of human participants in research. Procedures and potential  
9  
10 117 risks involved in the study are discussed with participants prior to obtaining informed consent  
11  
12 118 (supplementary material). This protocol is registered on ClinicalTrials.gov (NCT03235804),  
13  
14  
15 119 and recruitment started on April 2019 and is expected to finish in November 2023 (**Table 1**).

16  
17 **Table 1.** World Health Organization trial registration dataset

| Data category                                 | Information                                                                                                                                                                                        |
|-----------------------------------------------|----------------------------------------------------------------------------------------------------------------------------------------------------------------------------------------------------|
| Primary registry and trial identifying number | ClinicalTrials.gov NCT03235804                                                                                                                                                                     |
| Date of registration in primary registry      | August 1, 2017                                                                                                                                                                                     |
| Secondary identifying numbers                 | University of Alberta Research Ethics Board # Pro00070712                                                                                                                                          |
| Source(s) of monetary or material support     | Almased Wellness-GmbH (Bienenbüttel, Germany)                                                                                                                                                      |
| Primary sponsor                               | Almased Wellness-GmbH (Bienenbüttel, Germany)                                                                                                                                                      |
| Secondary sponsor(s)                          | N/A                                                                                                                                                                                                |
| Contact for public queries                    | Dr Carla Prado +1 (780) 492-9555 <a href="mailto:carla.prado@ualberta.ca">carla.prado@ualberta.ca</a> and Jens Walter +353 (0)21 490-1773 <a href="mailto:jenswalter@ucc.ie">jenswalter@ucc.ie</a> |
| Contact for scientific queries                | Dr Carla Prado +1 (780) 492-9555 <a href="mailto:carla.prado@ualberta.ca">carla.prado@ualberta.ca</a> and Jens Walter +353 (0)21 490-1773 <a href="mailto:jenswalter@ucc.ie">jenswalter@ucc.ie</a> |
| Public title                                  | The impact of a powdered meal replacement on metabolism and gut microbiota (Premium Study)                                                                                                         |
| Scientific title                              | The impact of a powdered meal replacement on metabolism and gut microbiota: a 12-week study in individuals with excessive body weight (The PREMIUM Study)                                          |
| Countries of recruitment                      | Canada                                                                                                                                                                                             |
| Health condition(s) or problem(s) studied     | Overweight and obesity                                                                                                                                                                             |
| Intervention(s)                               | Powdered meal replacement                                                                                                                                                                          |

|                                                     |                                                                                                                                                                                                                                                                                                                                                                                                                                                                                                                                 |
|-----------------------------------------------------|---------------------------------------------------------------------------------------------------------------------------------------------------------------------------------------------------------------------------------------------------------------------------------------------------------------------------------------------------------------------------------------------------------------------------------------------------------------------------------------------------------------------------------|
| Key inclusion and exclusion criteria                | Inclusion Criteria: (a) female/male aged 18 to 50 years; (b) non-smoker; (c) body mass index (BMI) between 25 and 37 kg/m <sup>2</sup> ; (d) weight stable; (e) fat mass $\geq$ 20% for men and $\geq$ 25% for women; (f) stable physical activity level.<br><br>Exclusion Criteria: (a) diagnosis of chronic diseases or acute infections; (b) taking any medication that may alter study outcomes; (c) taking pre- and probiotics; (d) use of antibiotics in the past two months; (e) females that are pregnant or lactating. |
| Study type                                          | Randomized controlled trial                                                                                                                                                                                                                                                                                                                                                                                                                                                                                                     |
| Date of first enrolment                             | April 1, 2019                                                                                                                                                                                                                                                                                                                                                                                                                                                                                                                   |
| Sample size                                         | 88                                                                                                                                                                                                                                                                                                                                                                                                                                                                                                                              |
| Recruitment status                                  | Actively recruiting                                                                                                                                                                                                                                                                                                                                                                                                                                                                                                             |
| Primary outcome(s)                                  | Interleukin-6                                                                                                                                                                                                                                                                                                                                                                                                                                                                                                                   |
| Key secondary outcomes                              | Gut microbiota                                                                                                                                                                                                                                                                                                                                                                                                                                                                                                                  |
| Ethics review                                       | University of Alberta Research Ethics Board # Pro00070712                                                                                                                                                                                                                                                                                                                                                                                                                                                                       |
| Completion date                                     | N/A                                                                                                                                                                                                                                                                                                                                                                                                                                                                                                                             |
| Summary results                                     | N/A                                                                                                                                                                                                                                                                                                                                                                                                                                                                                                                             |
| Individual Participant Data (IPD) sharing statement | De-identified data will be shared with the participant upon completion of the study (publication)                                                                                                                                                                                                                                                                                                                                                                                                                               |

## Outcome measures

The primary study outcome is to compare changes in IL-6 concentration over time (within groups) between the PMR and CON groups. Secondary outcome is to examine shifts in in gut microbiome composition, assessed by relative abundances of amplicon sequence variant (ASV) over time (within groups) between the PMR and CON groups. Exploratory outcomes include:

- Remaining gut microbiome diversity indices and relative abundances of bacteria at different taxonomic levels (i.e., phylum, family, and genus) over time (within groups) between the PMR and CON groups.



- 1  
2  
3 131 • Change in markers of systemic inflammation (high-sensitivity CRP [hs-CRP], IL-8, and  
4  
5 132 TNF- $\alpha$ ) and immune modulation (IL-10) over time (within groups) between the PMR  
6  
7 133 and CON groups.  
8  
9  
10 134 • Change in concentrations of metabolic blood markers (glucose, insulin, total  
11  
12 135 cholesterol, LDL-C, high-density lipoprotein cholesterol [HDL-C], triglycerides,  
13  
14 136 peptide tyrosine-tyrosine [PYY], glucagon-like peptide-1 [GLP-1], ghrelin,  
15  
16 137 adiponectin, leptin, free glycerol, free fatty acids, and thyroid stimulating hormone  
17  
18 138 [TSH]) over time (within groups) between the PMR and CON groups.  
19  
20  
21 139 • Change in resting energy expenditure (REE) and respiratory exchange ratio (RER) over  
22  
23 140 time (within groups) between the PMR and CON groups.  
24  
25  
26 141 • Change in body composition (fat mass [FM] and lean soft tissue [LST]) over time  
27  
28 142 (within groups) between the PMR and CON groups.  
29  
30  
31 143 • Change in appetite sensations (hunger, satiety, fullness, and prospective food  
32  
33 144 consumption) over time within the PMR group.  
34  
35  
36 145 • Differences in the responses to the intervention according to genetic polymorphisms  
37  
38 146 over time.  
39  
40  
41 147 • Changes in inflammation and excess body weight-related gene expression profile over  
42  
43 148 time (within groups) between the PMR and CON groups.  
44  
45  
46  
47  
48

## 150 **Research participants**

151 Inclusion criteria are as follows: male or female; non-smoker; between 18 and 50 years  
152 of age; BMI between 25.0 and 37.0 kg/m<sup>2</sup>; with a stable body weight 6 months prior to study  
153 initiation (i.e., variation <5 kg); fat mass  $\geq 20\%$  for males and  $\geq 25\%$  for females; willingness  
154 to maintain stable physical activity level throughout the study; and females must use effective  
155 birth control methods.  
60

1  
2  
3 156 Exclusion criteria includes participation in >3 hours per week of vigorous physical  
4  
5 157 activity; pregnancy or lactation; diagnosis of any chronic or acute diseases (except for excess  
6  
7 158 body weight); use of any medication that impacts study outcomes, except for antidepressants,  
8  
9 159 anxiolytic, and/or thyroid replacement therapy in a stable dose 3 months prior to study initiation  
10  
11 160 and throughout the study period; use of antibiotics 2 months prior to study initiation; use of  
12  
13 161 protein supplements 1 month prior to study initiation; allergy to PMR ingredients (soy, honey,  
14  
15 162 and yogurt); allergy or intolerance to soy, gluten, and/or lactose; following a vegetarian, vegan,  
16  
17 163 or any other restrictive dietary pattern; claustrophobia; or being unable to comprehend and  
18  
19 164 complete the required questionnaires. Participants consuming supplements or food items that  
20  
21 165 contain pre- or probiotics (e.g., kefir or kombucha) before being enrolled in the study will be  
22  
23 166 asked to discontinue the use of these products and wait 1 month before starting the study. The  
24  
25 167 use of other nutritional supplements, such as multivitamins and vitamin D<sub>3</sub> will be allowed if  
26  
27 168 on a stable dose.  
28  
29  
30  
31  
32

33 169

### 35 170 **Recruitment, randomization, and intervention**

37 171 Study advertisement is done using flyers displayed at the University of Alberta  
38  
39 172 campuses, surrounding communities, other post-secondary education institutions in Edmonton  
40  
41 173 (AB, Canada), and health care centres in the city. The study is also advertised in University of  
42  
43 174 Alberta email lists, newspapers, classrooms presentations, and on social media (e.g., Kijiji,  
44  
45 175 Facebook, and Twitter). Additionally, a personalized website (premium.ualberta.ca) was  
46  
47 176 created.  
48  
49  
50

51 177 Individuals interested in being part of the study will be invited to attend a screening  
52  
53 178 visit at the HNRU. This visit will include anthropometric measurements (i.e., height, weight,  
54  
55 179 and waist circumference), body composition assessment (bioelectrical impedance analysis  
56  
57 [BIA]), blood tests (i.e., creatinine, estimated glomerular filtration rate [eGFR], albumin,  
58  
59 180  
60

1  
2  
3 181 aspartate transaminase [AST], alanine transaminase [ALT], sodium, potassium, chloride, and  
4  
5 182 TSH), review of medical history, and completion of a physical activity questionnaire. Although  
6  
7 183 glucose, insulin, or lipid panel tests are not conducted during the screening visit, individuals  
8  
9 184 who exhibit symptoms of or are taking medications for chronic diseases (e.g., diabetes,  
10  
11 185 hypertension, and dyslipidemia) are deemed ineligible for participation.  
12  
13

14  
15 186 If deemed eligible, participants are randomly assigned into either the CON or PMR  
16  
17 187 group. Randomization is stratified by sex using a Microsoft Office Excel® spreadsheet. To  
18  
19 188 guarantee impartial allocation of participants to the groups, a study team member created a list  
20  
21 189 of random numbers and assigned them to each group using the website Randomization.com  
22  
23 190 (<http://www.jerrydallal.com/random/randomize.htm>) with the method of randomly permuted  
24  
25 191 blocks. The list of random numbers is concealed, and a second investigator subsequently  
26  
27 192 follows the predetermined order of numbers and assigns participants to their respective groups  
28  
29 193 based on the order of their screening. Although the investigator has access to the randomization  
30  
31 194 list, they do not refer to it when assigning participants to their respective groups.  
32  
33

34  
35 195 Participants assigned to the CON group are asked to maintain their usual diet for 12  
36  
37 196 weeks. The ones in the PMR group are asked to replace their morning and afternoon snacks  
38  
39 197 using a powdered meal replacement (Almased Wellness Comp., Bienenbüttel, Germany) and  
40  
41 198 otherwise maintain their usual diet for 12 weeks. Each snack is replaced by 50 grams of powder  
42  
43 199 mixed with 250 mL of water. The nutritional information of the meal replacement is displayed  
44  
45 200 in **Table 2**.  
46  
47

48  
49 201 **Table 2.** Nutritional information of the tested soy-honey-yogurt formula, a powdered meal  
50  
51 202 replacement (PMR)  
52

| Nutrient        | 50 g of Product (PMR) |
|-----------------|-----------------------|
| Calories (kcal) | 180                   |
| Total fat (g)   | 1.0                   |

|                                |     |
|--------------------------------|-----|
| <i>Saturated fat (g)</i>       | 0.5 |
| <i>Trans fat (g)</i>           | 0   |
| <i>Polyunsaturated fat (g)</i> | 0.1 |
| <i>Monounsaturated fat (g)</i> | 0.4 |
| Cholesterol (mg)               | 3   |
| Total carbohydrates (g)        | 15  |
| <i>Dietary fiber (g)</i>       | 0.5 |
| <i>Sugars (g)</i>              | 15  |
| Protein (g)                    | 27  |
| Sodium (mg)                    | 340 |
| Potassium (mg)                 | 500 |
| Vitamin A (IU)                 | 794 |
| Vitamin C (mg)                 | 16  |
| Vitamin E (IU)                 | 6   |
| Thiamin (Vitamin B1) (mg)      | 5   |
| Riboflavin (Vitamin B2) (mg)   | 6   |
| Vitamin B6 (mg)                | 7   |
| Calcium (mg)                   | 215 |
| Iron (mg)                      | 4.9 |

203

204

### 205 **Experimental protocol**

206 The study design is illustrated in **Figure 1**. The schedule of enrollment, interventions,  
 207 and assessments are shown in **Figure 2**. Following the screening visit and randomization  
 208 process, enrolled participants are invited to attend 3 study visits: baseline, week 6, and week

1  
2  
3 209 12. Assessments during each of these visits include: 1-hour resting metabolic rate (RMR),  
4  
5 210 blood draw, body composition, and physical activity questionnaire. They additionally receive  
6  
7 211 stool collection kits and instructions for fecal sample collection. During the baseline visit,  
8  
9 212 participants receive a scale and a journal to record the following information daily: body  
10  
11 213 weight, date and time of meal replacement intake (PMR group only), and medication intake (if  
12  
13 214 any). They are also asked to record on a weekly basis a 24h dietary recall (both groups) and fill  
14  
15 215 out appetite sensation questionnaires (PMR group only). Instructions on how to fill out the  
16  
17 216 journal and dietary records are given. Additionally, participants assigned to the PMR group  
18  
19 217 receive 84 packages of the PMR during visits at baseline and week 6, as well as instructions on  
20  
21 218 how to prepare it. Those assigned to the PMR group start consuming the supplement the day  
22  
23 219 after the first stool sample collection. Study materials (study journal and scale) are returned on  
24  
25 220 week 12.

26  
27  
28  
29  
30 221 A member of the study team contacts participants weekly to verify adherence to the  
31  
32 222 dietary intervention and potential adverse events. Their body weight is also discussed at that  
33  
34 223 time. If a body weight change greater than  $\pm 2\%$  of their initial body weight is noticed, a  
35  
36 224 nutrition consult with a Registered Dietitian is scheduled to provide instructions on how to  
37  
38 225 increase or decrease food intake and physical activity levels to return to baseline body weight.  
39  
40  
41  
42  
43

#### 44 227 *Anthropometry and body composition*

45  
46 228 At the screening visit, anthropometric measurements are taken twice, and the average  
47  
48 229 is used for data analysis. Height is measured using a digital stadiometer (235 Heightronic™,  
49  
50 230 Concepts, Quick Medical, Snoqualmie, WA, USA) to the nearest 0.1 cm. Body weight is  
51  
52 231 measured to the nearest 0.1 kg using a calibrated digital scale (Health-o-meter® Professional  
53  
54 232 Remote Display, Sunbeam Products Inc., FL, USA). Waist circumference is measured using a  
55  
56 233 measuring tape at the level of participant's belly button, as per standard procedure (19).  
57  
58  
59  
60

1  
2  
3 234 A digital scale (HD-314 TANITA Corporation, Tokyo, Japan) is provided to  
4  
5  
6 235 participants during the baseline visit, which is returned at the study completion. Body weight  
7  
8 236 is recorded daily in the morning in a fasting state, and with an empty bladder.  
9

10 237 Body composition is assessed using dual energy X-ray absorptiometry (DXA, GE  
11  
12 238 Lunar iDXA, General Electric Company, Madison, USA), air displacement plethysmography  
13  
14 239 (ADP, Bod Pod 1SB-060M, Life Measurement Instruments, Concord, CA, USA), and BIA  
15  
16 240 (Seca mBCA525, Seca GmbH & Co, Hamburg, Germany). A number of techniques is being  
17  
18 241 used to explore potential changes in body composition using multicompartiment modeling:  
19  
20 242 DXA for bone mineral content, BIA for total body water, ADP for body density, which is used  
21  
22 243 to calculate the remaining compartment: adipose tissue and residues (i.e., dry LST) (20, 21).  
23  
24  
25  
26 244

#### 28 245 *Resting energy expenditure*

30 246 Resting energy expenditure is assessed by indirect calorimetry using an open-circuit  
31  
32 247 metabolic chamber, which measures the volume of oxygen (O<sub>2</sub>) and carbon dioxide (CO<sub>2</sub>) from  
33  
34 248 participant's respiration. Participants lie down in a relaxed position without falling asleep and  
35  
36 249 breathe normally for 60 minutes. Mixed air with the expired CO<sub>2</sub> is drawn from the chamber  
37  
38 250 at a constant flow rate ( $60 \pm 2$  L/min) while fresh air with constant O<sub>2</sub> is passively drawn into  
39  
40 251 the chamber. The first 30 minutes of the test are considered time for acclimatization and hence  
41  
42 252 removed from analysis. Gas exchange (volume of CO<sub>2</sub> and O<sub>2</sub>) is analysed minute-by-minute  
43  
44 253 by the Advance Optima AO2000 Series CO<sub>2</sub> analyser (ABB Automation GmbH, Frankfurt,  
45  
46 254 Germany) and the Oxymat 6 O<sub>2</sub> analyser (Siemens AG, Munich, Germany). Data is transferred  
47  
48 255 from those analysers to a computer (Acer Aspire AM3910-E3122, Acer Inc., New Taipei City,  
49  
50 256 Taiwan) via the National Instruments NI USB-6221 device (National Instruments Corporation,  
51  
52 257 Austin, Tex., USA) using the PMCSS Software version 1.8 (Pennington Metabolic Chamber  
53  
54  
55  
56  
57  
58  
59  
60

258 Software Suite, Pennington Biomedical Research Center, La., USA). Resting energy  
 259 expenditure (kcal/day) is calculated using the average kcal/min multiplied by 1440.

260

261 *Blood analysis*

262 Blood is sampled from participants by venipuncture after an overnight fast during the  
 263 screening visit and at baseline, week 6, and week 12. Evaluated biomarkers are listed in **Table**  
 264 **3**.

265 **Table 3.** Blood parameters, sample, and laboratory responsible for blood analysis

| Parameter                 | Screening | Baseline | Week 6 | Week 12 | Sample | Laboratory |
|---------------------------|-----------|----------|--------|---------|--------|------------|
| Albumin                   | x         |          |        |         | Serum  | External   |
| Creatinine/eGFR           | x         |          |        |         | Serum  | External   |
| ALT                       | x         |          |        |         | Serum  | External   |
| AST                       | x         |          |        |         | Serum  | External   |
| Electrolytes <sup>a</sup> | x         |          |        |         | Serum  | External   |
| TSH                       | x         | x        | x      | x       | Serum  | External   |
| hs-CRP                    |           | x        | x      | x       | Serum  | External   |
| Glucose                   |           | x        | x      | x       | Serum  | External   |
| Lipid panel <sup>b</sup>  |           | x        | x      | x       | Serum  | External   |
| Free glycerol             |           | x        | x      | x       | Serum  | On site    |
| Free fatty acids          |           | x        | x      | x       | Serum  | On site    |
| Interleukins <sup>c</sup> |           | x        | x      | x       | Plasma | On site    |
| TNF- $\alpha$             |           | x        | x      | x       | Plasma | On site    |
| Insulin                   |           | x        | x      | x       | Plasma | On site    |
| Leptin                    |           | x        | x      | x       | Plasma | On site    |
| Adiponectin               |           | x        | x      | x       | Plasma | On site    |

|                 |   |   |   |             |         |
|-----------------|---|---|---|-------------|---------|
| PYY             | x | x | x | Plasma      | On site |
| GLP-1           | x | x | x | Plasma      | On site |
| Ghrelin         | x | x | x | Plasma      | On site |
| Polymorphisms   | x |   |   | Whole blood | On site |
| Gene expression | x |   | x | Whole blood | On site |

266 <sup>a</sup>Electrolytes include chloride, sodium, and potassium. <sup>b</sup>Lipid panel include triglycerides, total  
 267 cholesterol, LDL-C, and HDL-C. <sup>c</sup> Interleukins include IL-6, IL-8, and IL-10. Abbreviations:  
 268 ALT alanine aminotransferase; AST aspartate aminotransferase; eGFR estimated glomerular  
 269 filtration rate; GLP-1 glucagon like peptide; hs-CRP high-sensitivity C-reactive protein; PYY  
 270 peptide tyrosine-tyrosine; TNF- $\alpha$  tumor necrosis factor  $\alpha$ ; TSH thyroid stimulating hormone.

271  
 272 Blood samples are collected using BD Vacutainer<sup>®</sup> tubes (Becton, Dickinson and  
 273 Company, Franklin Lakes, NJ, USA). Tubes containing silica and a polymer are used for serum  
 274 separation, tubes containing K2-ethylenediaminetetraacetic acid (EDTA) are used for plasma  
 275 separation, and tubes containing K2EDTA and protease inhibitors (dipotassium and tacrine,  
 276 BD P800) are used for GLP-1 and ghrelin analysis.

277 Creatinine, eGFR, albumin, AST, ALT, sodium, potassium, chloride, and TSH are  
 278 analysed by an external lab (DynaLIFE Medical Labs, Edmonton, AB, Canada) at the screening  
 279 visit prior to enrollment. Glucose, lipid panel (triglycerides, total cholesterol, LDL-C, and  
 280 HDL-C), TSH, and hs-CRP will be analysed by DynaLIFE Medical Labs (Edmonton, AB,  
 281 Canada). Interleukin 6, IL-8, IL-10, TNF- $\alpha$ , insulin, PYY, GLP-1, ghrelin, adiponectin, leptin,  
 282 free glycerol, and free fatty acids will be analysed in our laboratory (University of Alberta, AB,  
 283 Canada). Interleukin 6, IL-8, IL-10, TNF- $\alpha$ , insulin, PYY, GLP-1, ghrelin, adiponectin, and  
 284 leptin will be analysed by electrochemiluminescence immunoassay (MesoScale Discovery<sup>®</sup>,  
 285 Maryland, USA).



1  
2  
3 286 An additional blood draw is requested the day following each study visit for hs-CRP  
4  
5 287 analysis due to this being a sensitive marker which can vary substantially within hours of  
6  
7 288 collection for several reasons (22). Therefore, the average of CRP measured on two consecutive  
8  
9 289 days will be taken in case they are similar. If a participant is in an infectious state (i.e., CRP  
10  
11 290 >10 mg/L or significant changes between the two days measurement) the highest value will be  
12  
13 291 excluded from analysis.  
14  
15

16  
17 292 For gene expression profile, ribonucleic acids (RNAs) will be sequenced at baseline  
18  
19 293 and week 12. Whole blood (500  $\mu$ L) is aliquoted into an RNase-free microfuge tube and added  
20  
21 294 1.3 mL of RNeasy lysis solution (Qiagen, Crawley, UK).  
22  
23 295 Total RNA will be extracted from whole blood using the RiboPure™ Blood Kit (Thermo Fisher  
24  
25 296 Scientific, Waltham, USA). The RNA purity will be determined by measuring the 260/280 nm  
26  
27 297 ratio (ideal ratio ~2.0) and the 260/230 nm ratio (ideal ratio 2.0-2.2) using a spectrophotometer.  
28  
29 298 The quality of RNA samples will be evaluated prior to library preparation for RNA-Seq, using  
30  
31 299 a bioanalyzer and an RNA Integrity Number (RIN)  $\geq 7$  will be accepted. Samples of high purity  
32  
33 300 and quality RNA will be prepared with the TruSeq RNA Sample Prep kit (Illumina, San Diego,  
34  
35 301 USA). The sequencing will be performed by an external company using the platform Illumina  
36  
37 302 HiSeq 4000 (Illumina, San Diego, USA), in the paired-end mode, in which the 2 ends will be  
38  
39 303 sequenced with a length of 100 base pairs (bp) (2 x 100 bp). At the end, 2 files in the 'fastq'  
40  
41 304 format will be generated for each of the evaluated samples.  
42  
43  
44  
45

46  
47 305 We will select a set of candidate genes that are known to be involved in the regulation  
48  
49 306 of inflammation and/or excess body weight and are differentially expressed after the  
50  
51 307 intervention. From these genes, we will analyze the most extensively studied polymorphisms.  
52  
53 308 The reasoning behind this approach is that genetic variations in these candidate genes could  
54  
55 309 potentially impact the expression and/or function of the proteins they encode, ultimately  
56  
57 310 influencing the response to the intervention. Genetic polymorphisms will be analysed at  
58  
59  
60

1  
2  
3 311 baseline. Genomic deoxyribonucleic acid (gDNA) will be extracted with the QIAamp DNA  
4  
5 312 Micro Kit (Qiagen, Hilden, Germany) from leukocytes in peripheral blood. The gDNA purity  
6  
7 313 will be verified in a spectrophotometer at 260 and 280 nm. The samples will be considered of  
8  
9 314 good quality if the ratio between absorbances is between 1.7 and 2.0. The gDNA concentration  
10  
11 315 will be measured on a fluorimeter. For genotyping, a customized Infinium Global Screening  
12  
13 316 Array-24 + v3.0 Kit (Illumina, San Diego, USA) will be used.  
14  
15  
16  
17 317

### 18 19 318 *Fecal sample collection and gut microbiome sequencing*

20  
21 319 A total of three fecal samples are collected at baseline, week 6, and week 12. Fecal  
22  
23 320 samples are either collected at the HNRU the day of the study visits, or at home, kept at room  
24  
25 321 temperature, and delivered to the HNRU as soon as possible. During the baseline visit,  
26  
27 322 participants are instructed on how to collect fecal samples using the provided collection kits.  
28  
29 323 The fecal collection tubes (DNA/RNA Shield, Zymo Research, Irvine, CA, USA) preserve  
30  
31 324 nucleic acids in the sample and maintain stability at room temperature. Once delivered to the  
32  
33 325 lab, the fecal sample tubes are frozen at -80°C until processing and analysis.  
34  
35  
36  
37

38 326 The microbial DNA will be extracted from all samples including positive and negative  
39  
40 327 controls, using QIAamp Fast DNA Stool Mini Kit as previously described (23), packed with  
41  
42 328 dried-ice, and shipped to University of Minnesota Genomic Center (Minnesota, US) for  
43  
44 329 sequencing. Shipping will adhere the regulation of Environment, Health and Safety  
45  
46 330 Department, University of Alberta. MiSeq Illumina technology (300 bp pair-end) will be used  
47  
48 331 to sequence 16S ribosomal ribonucleic acid (rRNA) targeting V5-V6 region to characterize the  
49  
50 332 fecal microbiome composition using primer pair 784F [5'-RGGATTAGATACCC -3'] and  
51  
52 333 1064R [5'-CGACRRCCATGCANCACCT-3'].  
53  
54  
55  
56  
57 334

### 58 59 335 *Physical activity questionnaire*

60

1  
2  
3 336 The Godin-Shephard leisure-time physical activity questionnaire will be completed at  
4  
5 337 baseline, week 6, and week 12 to estimate physical activity levels (24, 25). In this questionnaire,  
6  
7 338 participants answer how often they perform strenuous, moderate, and light exercise for more  
8  
9 339 than 15 minutes in one week. A physical activity score is calculated based on intensity =  $(9 \times$   
10  
11 340 strenuous) +  $(5 \times$  moderate) +  $(3 \times$  light) (25, 26). This will be used to classify participants as  
12  
13 341 insufficiently active ( $<14$  units), moderately active ( $\geq 14$  and  $<24$  units), or active ( $\geq 24$  units)  
14  
15 342 (26).  
16  
17  
18  
19  
20  
21

#### 22 344 *Dietary intake*

23  
24 345 The dietary intake will be assessed using the online Automated Self-Administered 24-  
25  
26 346 hour Recall (ASA24<sup>®</sup>) Canada (27). A paper-based version is available per individual  
27  
28 347 participant and is returned to the study team weekly by email or fax. Dietary information is  
29  
30 348 entered in ASA24<sup>®</sup> to ensure consistency. Three 24h recalls are completed at weeks 1, 6, and  
31  
32 349 12 (two weekdays and one weekend day) and one 24h recall per week on the remaining weeks  
33  
34 350 of the study period (one weekday). Energy, macronutrients, and micronutrients intake will be  
35  
36 351 obtained using ASA24<sup>®</sup> automated coding based on the amount of each food consumed.  
37  
38  
39  
40  
41

#### 42 353 *Appetite sensations*

43  
44 354 To assess how the PMR affects appetite, participants assigned to the PMR group rate  
45  
46 355 their appetite sensations using the study journals once a week and at five timepoints: 1)  
47  
48 356 immediately after waking up/fasting, 2) immediately before the morning PMR consumption,  
49  
50 357 3) 30 minutes after the morning PMR consumption, 4) immediately before the afternoon PMR  
51  
52 358 consumption, and 5) 30 minutes after the afternoon PMR consumption. Hunger, satiety,  
53  
54 359 fullness, and prospective food consumption will be assessed using a paper-and-pen 100-mm  
55  
56 360 visual analogue scale (28). They are instructed to make a single vertical mark between 2  
57  
58  
59  
60

1  
2  
3 361 anchors to indicate the intensity of their subjective states regarding each element, on a scale  
4  
5 362 from 0 to 100 mm. The following questions are asked: How hungry do you feel? (I am not  
6  
7  
8 363 hungry at all – I have never been more hungry); How satisfied do you feel? (I am completely  
9  
10 364 empty – I cannot eat another bite); How full do you feel? (not at all full – totally full); How  
11  
12 365 much do you think you can eat? (nothing at all – a lot).  
13  
14  
15 366

### 16 367 *Adherence and withdraw/discontinuation*

17  
18  
19 368 Participants are immediately withdrawn from the study if they: 1) have significant  
20  
21 369 variation in body weight ( $>\pm 3\%$  of baseline body weight (29)) that does not return to baseline  
22  
23 370 2 weeks after the nutrition consult; 2) become pregnant; 3) start or change medications or  
24  
25 371 supplement intake listed in the eligibility criteria; 4) no longer meet the inclusion criteria.  
26  
27 372 Participants assigned to the PMR group are asked to return all supplement bags (empty or not)  
28  
29 373 to the visits on week 6 and 12. These are weighted, and participants are excluded from the  
30  
31 374 study if the PMR have not been consumed twice daily during the 12 weeks or if there is  $>20\%$   
32  
33 375 of product left inside the bags. In addition, participants can withdraw from the study at any  
34  
35 376 time.  
36  
37  
38  
39  
40 377

### 41 378 **Statistical analyses**

#### 42 379 *Sample size estimate*

43  
44  
45 380 A total of 74 participants (37 in each group) will be needed to detect a medium effect  
46  
47 381 size of 0.669. The effect size was calculated based on a previously published study (30), in  
48  
49 382 which the mean percent change in IL-6 from baseline to 12 months was  $-6.76 \pm 36.95$  pg/mL  
50  
51 383 in a group receiving soy protein versus  $17.62 \pm 35.92$  pg/mL in the control group. Accounting  
52  
53 384 for a 20% attrition rate, the total sample size of 88 participants (44 in each group) will have a  
54  
55  
56  
57  
58  
59  
60

1  
2  
3 385 power of 80% with a significance level of 5%. The sample size calculation was done using  
4  
5 386 G\*Power version 3.1.9.2.  
6  
7

8 387

9  
10 388 *Data analysis*  
11

12 389 Normality of the study variables will be assessed by the Shapiro-Wilk W-test. By  
13  
14 390 inspecting boxplots, values >1.5 box-lengths from the edge of the box will be considered as  
15  
16 391 outliers and may be excluded from analysis. Differences between groups of nominal variables  
17  
18 392 will be analysed by Pearson's  $\chi^2$  test or Fisher's exact test. Both group effect and time effect  
19  
20 393 will be analyzed using a two-way mixed analysis of variance (ANOVA) or analysis of  
21  
22 394 covariance (ANCOVA) as appropriate. Assumption of homogeneity of variances will be tested  
23  
24 395 using Levene's test of equality of variances. Correlation between variables will be assessed by  
25  
26 396 Pearson's correlation. If significant correlations between nutrients and energy intake are  
27  
28 397 noticed, the residual method will be applied in order to describe the relationship between  
29  
30 398 aspects of food intake and biochemical characteristics independent of energy intake (31). All  
31  
32 399 analyses will be performed using IBM® SPSS® Statistics version 24 (International Business  
33  
34 400 Machines Corporation), considering a critical significance value of 5%, unless otherwise  
35  
36 401 stated.  
37  
38  
39  
40

41  
42 402 Regarding genetic polymorphisms analysis, adherence to the Hardy-Weinberg  
43  
44 403 equilibrium will be checked using the  $\chi^2$ -square test. The R package 'argyle' will be used to  
45  
46 404 analyze the genotype data and assess the potential impact on the responses to the intervention  
47  
48 405 (32). To verify whether the results differ among the genotypes, the dominant model (major  
49  
50 406 allele x heterozygous + minor allele) will be applied. Effect size (ES) will be assessed by  
51  
52 407 Cohen's d-test and multivariate analysis (MANOVA) will be applied, including time and  
53  
54 408 genotype as the two independent variables. For post-hoc analysis, the Stoll Dwass test ( $p < 0.05$ )  
55  
56 409 will be applied. Statistical analysis of the gene expression profile will include the evaluation of  
57  
58  
59  
60

1  
2  
3 410 the quality of the sequences with the FastQC tool. The Trimmomatic software (33) will be used  
4  
5 411 to remove low-quality strings and adapters. Then, the libraries will be evaluated again in the  
6  
7 412 FastQC software, for proper verification. The RNA sequencing data will be subjected to  
8  
9 413 analysis by RNA-seq using the protocol described in Trapnell, Roberts (34). The functional  
10  
11 414 annotation of differentially expressed genes will be carried out through the GeneOntology  
12  
13 415 platform (<http://geneontology.org>). Analyses to identify differentially expressed metabolic  
14  
15 416 pathways will be performed using the fgsea package of the R software.

16  
17  
18  
19 417 For the gut microbiome analysis, raw sequencing data will be undergone multiple  
20  
21 418 quality control steps including primer removal, trimming, chimera removal as previously  
22  
23 419 described (35, 36). Sequences will be classified using classify-sklearn algorithm (37) against  
24  
25 420 Silva database v.138 generated for given primers by RESCRIPT (38). To decontamination, non-  
26  
27 421 target sequences will be removed such as mitochondria, chloroplast and archaea. Possible  
28  
29 422 contamination detected by positive and negative controls and sequences with raw count <3 and  
30  
31 423 present in <10% of samples will be removed. Sample with an extremely low number of reads  
32  
33 424 (< 2000 after filtering) will not be considered in microbiome analysis. Filtered ASV table in  
34  
35 425 count data will be converted to relative abundant data for visualisation, then centered log-ratio  
36  
37 426 (CLR) transformed. The indices of  $\alpha$ -diversity (e.g., observed species, Shannon, Phylogenetic  
38  
39 427 Diversity, Inver Simpson) and  $\beta$ -diversity (e.g., Bray-Curtis and Aitchison distance) will be  
40  
41 428 calculated using Phyloseq (39) and microbiome (40) R packages. Bray-Curtis distance will be  
42  
43 429 used to generate non-parametric multidimensional scaling ordination plots for  $\beta$ -diversity  
44  
45 430 metrics with scaled and centered results. Stability over time will also be assessed based on  
46  
47 431 Bray-Curtis distances. The adonis2 function in R package vegan will be used for permutational  
48  
49 432 multivariate analysis of variance (PERMANOVA). Aitchison distance will be used for  
50  
51 433 Principal component analysis (PCA) in mapping microbiome and metabolic markers data to  
52  
53  
54  
55  
56  
57  
58  
59  
60

1  
2  
3 434 exploring multidimensional association (23). False discovery rate (FDR) will be used to adjust  
4  
5 435 p values, and  $FDR < 0.05$  will be considered as statistically significant.  
6  
7  
8 436

9  
10 437 **Patient and public involvement:**

11  
12 438 None.  
13  
14  
15 439

16  
17 440 **ETHICS AND DISSEMINATION**

18  
19 441 This study is approved by the University of Alberta's HREB (Pro00070712) and is  
20  
21 442 registered on ClinicalTrials.gov (NCT03235804). This research adheres to the standards as set  
22  
23 443 out in the Canadian Tri-Council Policy statement on the use of human participants in research.  
24  
25 444 This study is regulated by Health Canada. Amendments will be submitted to the HREB and  
26  
27 445 Health Canada review and approval prior implementations. ClinicalTrials.gov will be updated  
28  
29 446 accordingly.  
30  
31  
32

33 447 All personal information is kept private, and participation is anonymous. Participants  
34  
35 448 are assigned a study ID, which is kept separated from any personal information collected. A  
36  
37 449 master list with identifiable information and study IDs is cryptographically protected and stored  
38  
39 450 at the HNRU. The study information will be kept for 15 years after the completion of the study.  
40  
41 451 If participants withdraw consent, they are asked for permission to use the data collected until  
42  
43 452 that point; however, if they deny it, their data is destroyed. Absence of answer is considered as  
44  
45 453 permission to use the data. The Quality Management in Clinical Research (QMCR) Department  
46  
47 454 at the University of Alberta is independent of investigators and sponsor. The QMCR is  
48  
49 455 responsible for monitoring the study data and will conduct yearly auditing.  
50  
51  
52

53 456 Following data collection, analysis, and review of findings, manuscripts will be  
54  
55 457 prepared for submission to peer-reviewed journals and results presented in national and  
56  
57 458 international conferences. Study findings will also be disseminated through social media. Data  
58  
59  
60

1  
2  
3 459 will be published regardless of outcomes and the University of Alberta retains the right to  
4  
5 460 publish. Authorship eligibility will adhere to the International Committee of Medical Journal  
6  
7 461 Editors' recommended guidelines (41). As a mandate of completing a registered trial, the  
8  
9 462 results must be published within 12 months of the completion of the trial. Dataset and statistical  
10  
11 463 code may be provided upon request.  
12  
13  
14  
15 464

16  
17 465 **Figure legends:**

18  
19 466 **Figure 1.** Experimental protocol. Abbreviations: CON control group, PMR powdered meal  
20  
21 467 replacement group.

22  
23 468 **Figure 2.** Schedule of enrollment, interventions, and assessments (SPIRIT figure).  
24  
25 469 Abbreviations: CON control group, PMR powdered meal replacement group.  
26  
27  
28

29 470

30  
31 471 **Author contributions:**

32  
33 472 JM, CLPO, AMA, AB, AMS, LM, CC, SG, CR, NKN, PDC, JW, and CMP were involved in  
34  
35 473 the design of the study. JM, CLPO, AMS, JW, and CMP wrote the study protocol. JM, CLPO,  
36  
37 474 AMA, AB, AMS, LM, CC, SG, CR, NKN, PDC, JW, and CMP participated in drafting and  
38  
39 475 revising the manuscript. JM, CLPO, AMA, AB, AMS, LM, CC, SG, CR, NKN, PDC, JW, and  
40  
41 476 CMP read and approved the final manuscript.  
42  
43  
44

45 477

46  
47 478 **Funding statement:** This was an investigator-initiated trial supported by Almased Wellness-  
48  
49 479 GmbH (Bienenbüttel, Germany). Per contractual agreement, the funder has had no role in the  
50  
51 480 study design and implementation, writing of the manuscript, and decision to submit the article  
52  
53 481 for publication. Some of the infrastructure used in the project was funded by the Canadian  
54  
55 482 Foundation for Innovation John R Evans Leaders Fund (Project # 34115). CMP is supported  
56  
57 483 by a Campus Alberta Innovates Program Chair in Nutrition, Food and Health. CLPO is  
58  
59  
60



1  
2  
3 484 supported by the Mitacs Accelerate International (Mitacs, Canada) in partnership with Almased  
4  
5 485 USA Inc.  
6  
7  
8 486

9  
10 487 **Competing interests' statement:** In addition to what is noted under "Funding", CLPO reports  
11  
12 488 receiving honoraria and/or paid consultancy from Abbott and AMRA Medical Inc. outside the  
13  
14 489 scope of this work. AB received research support for their departments and consultant or  
15  
16 490 speakers' honoraria from the Almased-Wellness-GmbH. AMS reports receiving honoraria  
17  
18 491 and/or paid consultancy from Novo Nordisk, Johnson & Johnson, Boehringer Ingelheim, and  
19  
20 492 Xeno Biosciences outside the scope of this work. PDC is inventor on patent applications  
21  
22 493 dealing with the use of specific bacteria and components in the treatment of different diseases.  
23  
24 494 PDC was co-founder of The Akkermansia Company SA and of Enterosys S.A. JW has received  
25  
26 495 research funding and consulting fees from industry sources involved in the manufacture and  
27  
28 496 marketing of dietary fibers, prebiotics, and probiotics. JW is further a co-owner of Synbiotics  
29  
30 497 Health, a developer of synbiotic products. CMP reports receiving honoraria and/or paid  
31  
32 498 consultancy from Abbott Nutrition, Nutricia, Nestle Health Science, Fresenius Kabi, Pfizer,  
33  
34 499 and AMRA medical outside the scope of this work. Other authors declare no conflict of interest.  
35  
36  
37  
38  
39

40 500

## 41 42 501 **References**

- 43  
44 502 1. Sung H, Siegel RL, Torre LA, Pearson-Stuttard J, Islami F, Fedewa SA, et al. Global  
45  
46 503 patterns in excess body weight and the associated cancer burden. CA: A Cancer Journal for  
47  
48 504 Clinicians. 2019;69(2):88-112.  
49  
50  
51 505 2. World Health Organization. Obesity and overweight World Health Organization  
52  
53 506 website2021 [Available from: [https://www.who.int/news-room/fact-sheets/detail/obesity-and-](https://www.who.int/news-room/fact-sheets/detail/obesity-and-overweight)  
54  
55 507 [overweight](https://www.who.int/news-room/fact-sheets/detail/obesity-and-overweight).  
56  
57  
58  
59  
60

- 1  
2  
3 508 3. Furman D, Campisi J, Verdin E, Carrera-Bastos P, Targ S, Franceschi C, et al. Chronic  
4  
5 509 inflammation in the etiology of disease across the life span. *Nature Medicine*.  
6  
7 510 2019;25(12):1822-32.  
8  
9  
10 511 4. Monteiro R, Azevedo I. Chronic inflammation in obesity and the metabolic syndrome.  
11  
12 512 *Mediators of Inflammation*. 2010;2010:1-10.  
13  
14 513 5. Karczewski J, Śledzińska E, Baturó A, Jończyk I, Maleszko A, Maleszko A, et al.  
15  
16 514 Obesity and inflammation. *European Cytokine Network*. 2018;29(3):83-94.  
17  
18 515 6. Longo M, Zatterale F, Naderi J, Parrillo L, Formisano P, Raciti GA, et al. Adipose  
19  
20 516 tissue dysfunction as determinant of obesity-associated metabolic complications. *International*  
21  
22 517 *Journal of Molecular Sciences*. 2019;20(9):2358.  
23  
24  
25 518 7. Vallianou N, Stratigou T, Christodoulatos GS, Dalamaga M. Understanding the role of  
26  
27 519 the gut microbiome and microbial metabolites in obesity and obesity-associated metabolic  
28  
29 520 disorders: current evidence and perspectives. *Current Obesity Reports*. 2019;8(3):317-32.  
30  
31 521 8. Boulangé CL, Neves AL, Chilloux J, Nicholson JK, Dumas M-E. Impact of the gut  
32  
33 522 microbiota on inflammation, obesity, and metabolic disease. *Genome Medicine*. 2016;8(1):1-  
34  
35 523 12.  
36  
37 524 9. Heymsfield SB, Van Mierlo CAJ, Van Der Knaap HCM, Heo M, Frier HI. Weight  
38  
39 525 management using a meal replacement strategy: meta and pooling analysis from six studies.  
40  
41 526 *International Journal of Obesity*. 2003;27(5):537-49.  
42  
43 527 10. Astbury NM, Piernas C, Hartmann-Boyce J, Lapworth S, Aveyard P, Jebb SA. A  
44  
45 528 systematic review and meta-analysis of the effectiveness of meal replacements for weight loss.  
46  
47 529 *Obesity Reviews*. 2019;20(4):569-87.  
48  
49 530 11. Kempf K, Schloot NC, Gartner B, Keil R, Schadewaldt P, Martin S. Meal replacement  
50  
51 531 reduces insulin requirement, HbA1c and weight long-term in type 2 diabetes patients with >100  
52  
53 532 U insulin per day. *Journal of Human Nutrition and Dietetics*. 2014;27 Suppl 2:21-7.  
54  
55  
56  
57  
58  
59  
60

- 1  
2  
3 533 12. Halle M, Röhling M, Banzer W, Braumann KM, Kempf K, Mccarthy D, et al. Meal  
4  
5 534 replacement by formula diet reduces weight more than a lifestyle intervention alone in patients  
6  
7 535 with overweight or obesity and accompanied cardiovascular risk factors—the ACOORH trial.  
8  
9 536 European Journal of Clinical Nutrition. 2021;75(4):661-9.
- 10  
11  
12 537 13. Kempf K, Röhling M, Banzer W, Braumann KM, Halle M, Mccarthy D, et al. High-  
13  
14 538 Protein, Low-Glycaemic Meal Replacement Decreases Fasting Insulin and Inflammation  
15  
16 539 Markers—A 12-Month Subanalysis of the ACOORH Trial. *Nutrients*. 2021;13(5):1433.
- 17  
18  
19 540 14. Kolotkin RL, Andersen JR. A systematic review of reviews: exploring the relationship  
20  
21 541 between obesity, weight loss and health-related quality of life. *Clinical Obesity*. 2017;7(5):273-  
22  
23 542 89.
- 24  
25  
26 543 15. Forsythe LK, Wallace JMW, Livingstone MBE. Obesity and inflammation: the effects  
27  
28 544 of weight loss. *Nutrition Research Reviews*. 2008;21(2):117-33.
- 29  
30  
31 545 16. Case CC, Jones PH, Nelson K, O'Brian Smith E, Ballantyne CM. Impact of weight loss  
32  
33 546 on the metabolic syndrome. *Diabetes, Obesity and Metabolism*. 2002;4(6):407-14.
- 34  
35  
36 547 17. Berg A, McCarthy HD. A soy-yoghurt-honey product as a therapeutic functional food:  
37  
38 548 mode of action and narrative review. *Heliyon*. 2022;8(11):e11011.
- 39  
40  
41 549 18. Chan A-W, Tetzlaff JM, Altman DG, Laupacis A, Gøtzsche PC, Krleža-Jerić K, et al.  
42  
43 550 SPIRIT 2013 statement: defining standard protocol items for clinical trials. *Annals of internal*  
44  
45 551 *medicine*. 2013;158(3):200-7.
- 46  
47  
48 552 19. Lohman TG, Roche AF, Martorell R. Anthropometric standardization reference  
49  
50 553 manual: Human kinetics books; 1988.
- 51  
52  
53 554 20. Siervo M, Jebb SA. Body composition assessment: theory into practice: introduction of  
54  
55 555 multicompartment models. *IEEE Engineering in Medicine and Biology Magazine*.  
56  
57 556 2010;29(1):48-59.
- 58  
59  
60

- 1  
2  
3 557 21. Fosbøl MØ, Zerahn B. Contemporary methods of body composition measurement.  
4  
5 558 *Clinical Physiology and Functional Imaging*. 2015;35(2):81-97.  
6  
7  
8 559 22. Pearson TA, Mensah GA, Alexander RW, Anderson JL, Cannon RO, Criqui M, et al.  
9  
10 560 Markers of inflammation and cardiovascular disease. *Circulation*. 2003;107(3):499-511.  
11  
12 561 23. Nguyen NK, Deehan EC, Zhang Z, Jin M, Baskota N, Perez-Muñoz ME, et al. Gut  
13  
14 562 microbiota modulation with long-chain corn bran arabinoxylan in adults with overweight and  
15  
16 563 obesity is linked to an individualized temporal increase in fecal propionate. *Microbiome*.  
17  
18 564 2020;8(1).  
19  
20  
21 565 24. Godin G, Shephard R. A simple method to assess exercise behavior in the community.  
22  
23 566 *Canadian Journal of Applied Sport Sciences*. 1985;10(3):141-6.  
24  
25  
26 567 25. Shephard R. Godin leisure-time exercise questionnaire. *Medicine & Science in Sports*  
27  
28 568 *& Exercise*. 1997;29(6):S36-S8.  
29  
30  
31 569 26. Godin G. The Godin-Shephard leisure-time physical activity questionnaire. *The Health*  
32  
33 570 *& Fitness Journal of Canada*. 2011;4(1):18-22.  
34  
35  
36 571 27. National Cancer Institute. ASA24 Automated Self-Administered 24-Hour Recall,  
37  
38 572 *Epidemiology and Genomics Research Program, Division of Cancer Control and Population*  
39  
40 573 *Sciences 2015* [Available from: <http://epi.grants.cancer.gov/asa24/>].  
41  
42 574 28. Flint A, Raben A, Blundell J, Astrup A. Reproducibility, power and validity of visual  
43  
44 575 analogue scales in assessment of appetite sensations in single test meal studies. *International*  
45  
46 576 *Journal of Obesity*. 2000;24(1):38-48.  
47  
48  
49 577 29. Stevens J, Truesdale KP, McClain JE, Cai J. The definition of weight maintenance.  
50  
51 578 *International journal of obesity*. 2006;30(3):391-9.  
52  
53  
54 579 30. Mangano KM, Hutchins-Wiese HL, Kenny AM, Walsh SJ, Abourizk RH, Bruno RS,  
55  
56 580 et al. Soy proteins and isoflavones reduce interleukin-6 but not serum lipids in older women: a  
57  
58 581 randomized controlled trial. *Nutrition Research*. 2013;33(12):1026-33.  
59  
60

- 1  
2  
3 582 31. Willett WC, Howe GR, Kushi LH. Adjustment for total energy intake in epidemiologic  
4  
5 583 studies. *The American Journal of Clinical Nutrition*. 1997;65(4):1220S-8S.  
6  
7  
8 584 32. Morgan AP. argyle: An R Package for Analysis of Illumina Genotyping Arrays. *G3*  
9  
10 585 *Genes|Genomes|Genetics*. 2016;6(2):281-6.  
11  
12 586 33. Bolger AM, Lohse M, Usadel B. Trimmomatic: a flexible trimmer for Illumina  
13  
14 587 sequence data. *Bioinformatics*. 2014;30(15):2114-20.  
15  
16  
17 588 34. Trapnell C, Roberts A, Goff L, Pertea G, Kim D, Kelley DR, et al. Differential gene  
18  
19 589 and transcript expression analysis of RNA-seq experiments with TopHat and Cufflinks. *Nature*  
20  
21 590 *Protocols*. 2012;7(3):562-78.  
22  
23  
24 591 35. Bolyen E, Rideout JR, Dillon MR, Bokulich NA, Abnet CC, Al-Ghalith GA, et al.  
25  
26 592 Reproducible, interactive, scalable and extensible microbiome data science using QIIME 2.  
27  
28 593 *Nature Biotechnology*. 2019;37(8):852-7.  
29  
30  
31 594 36. Callahan BJ, Mcmurdie PJ, Rosen MJ, Han AW, Johnson AJA, Holmes SP. DADA2:  
32  
33 595 High-resolution sample inference from Illumina amplicon data. *Nature Methods*.  
34  
35 596 2016;13(7):581-3.  
36  
37  
38 597 37. Pedregosa F, Varoquaux G, Gramfort A, Michel V, Thirion B, Grisel O, et al. Scikit-  
39  
40 598 learn: Machine learning in Python. *the Journal of machine Learning research*. 2011;12:2825-  
41  
42 599 30.  
43  
44  
45 600 38. Robeson MS, O'Rourke DR, Kaehler BD, Ziemski M, Dillon MR, Foster JT, et al.  
46  
47 601 RESCRIPt: Reproducible sequence taxonomy reference database management. *PLOS*  
48  
49 602 *Computational Biology*. 2021;17(11):e1009581.  
50  
51  
52 603 39. Mcmurdie PJ, Holmes S. phyloseq: An R Package for Reproducible Interactive  
53  
54 604 Analysis and Graphics of Microbiome Census Data. *PLoS ONE*. 2013;8(4):e61217.  
55  
56 605 40. Lahti L, Shetty S, Turaga N, Obenchain V, Salojärvi J, Gilmore R. Tools for  
57  
58 606 microbiome analysis in R. Version. 2017.  
59  
60

1  
2  
3 607 41. International Committee of medical Journal editors. Defining the Role of Authors and  
4  
5 608 Contributors 2017 [Available from: [https://www.icmje.org/recommendations/browse/roles-  
8  
9  
10  
11 610](https://www.icmje.org/recommendations/browse/roles-<br/>6<br/>7 609 and-responsibilities/defining-the-role-of-authors-and-contributors.html)

12  
13  
14  
15  
16  
17  
18  
19  
20  
21  
22  
23  
24  
25  
26  
27  
28  
29  
30  
31  
32  
33  
34  
35  
36  
37  
38  
39  
40  
41  
42  
43  
44  
45  
46  
47  
48  
49  
50  
51  
52  
53  
54  
55  
56  
57  
58  
59  
60

For peer review only

1  
2  
3  
4  
5  
6  
7  
8  
9  
10  
11  
12  
13  
14  
15  
16  
17  
18  
19  
20  
21  
22  
23  
24  
25  
26  
27  
28  
29  
30  
31  
32  
33  
34  
35  
36  
37  
38  
39  
40  
41  
42  
43  
44  
45  
46  
47  
48  
49  
50  
51  
52  
53  
54  
55  
56  
57  
58  
59  
60

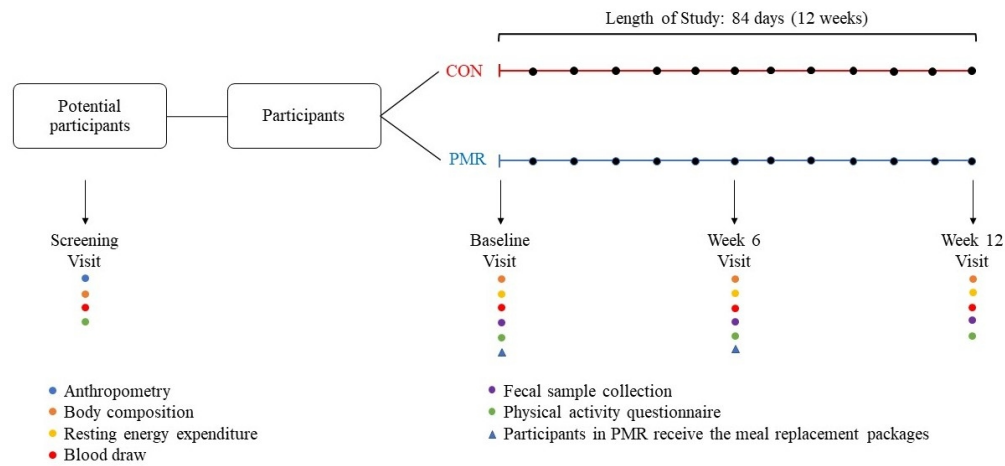

Figure 1. Experimental protocol. Abbreviations: CON control group, PMR powdered meal replacement group.

315x148mm (96 x 96 DPI)

| TIMEPOINT      |                                  | STUDY PERIOD    |                |                  |                  |                   |        |
|----------------|----------------------------------|-----------------|----------------|------------------|------------------|-------------------|--------|
|                |                                  | Enrollment      | Allocation     | Post-Allocation  |                  |                   |        |
|                |                                  | Screening visit | Post-screening | Visit 1 (week 1) | Visit 2 (week 6) | Visit 3 (week 12) | Weekly |
| ENROLLMENT     | Eligibility screen               | X               |                |                  |                  |                   |        |
|                | Informed consent                 | X               |                |                  |                  |                   |        |
|                | Anthropometry                    | X               |                |                  |                  |                   |        |
|                | Body composition                 | X               |                |                  |                  |                   |        |
|                | Blood tests                      | X               |                |                  |                  |                   |        |
|                | Questionnaires                   | X               |                |                  |                  |                   |        |
|                | Allocation                       |                 | X              |                  |                  |                   |        |
| INTERVENTIONS  | CON                              |                 |                | ●                |                  | ●                 |        |
|                | PMR                              |                 |                | ●                |                  | ●                 |        |
| ASSESSMENTS    | Gut microbiome                   |                 |                | X                | X                | X                 |        |
|                | Systemic inflammatory biomarkers |                 |                | X                | X                | X                 |        |
|                | Metabolic blood markers          |                 |                | X                | X                | X                 |        |
|                | Gene expression                  |                 |                | X                |                  | X                 |        |
|                | Gene polymorphisms               |                 |                | X                |                  |                   |        |
|                | Energy metabolism                |                 |                | X                | X                | X                 |        |
|                | Body composition                 |                 |                | X                | X                | X                 |        |
|                | Appetite sensation               |                 |                |                  |                  |                   | X      |
|                | Physical activity questionnaire  |                 |                | X                | X                | X                 |        |
| Dietary intake |                                  |                 |                |                  |                  | X                 |        |

Figure 2. Schedule of enrollment, interventions, and assessments (SPIRIT figure). Abbreviations: CON control group, PMR powdered meal replacement group.

205x139mm (150 x 150 DPI)



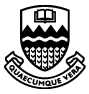

## **INFORMED CONSENT FORM**

**Title of Study:** The impact of a powdered meal replacement on metabolism and gut microbiota: a 12-week study in individuals with excessive body weight (The PREMIUM Study).

### **Principal Investigators:**

|                 |                       |                                 |
|-----------------|-----------------------|---------------------------------|
| Dr. Carla Prado | Phone: (780) 492-7934 | E-mail: carla.prado@ualberta.ca |
| Dr. Jens Walter |                       | E-mail: jwalter1@ualberta.ca    |
| Dr. Arya Sharma |                       | E-mail: amsharm@ualberta.ca     |

### **Qualified Investigator:**

|                  |                       |                                  |
|------------------|-----------------------|----------------------------------|
| Dr. Laurie Mereu | Phone: (780) 492-3626 | E-mail: laurie.mereu@ualberta.ca |
|------------------|-----------------------|----------------------------------|

### **Study Manager:**

|                     |                       |                             |
|---------------------|-----------------------|-----------------------------|
| Dr. Camila Oliveira | Phone: (780) 492-9010 | E-mail: premium@ualberta.ca |
|---------------------|-----------------------|-----------------------------|

### **Study Coordinator:**

|                  |                       |                             |
|------------------|-----------------------|-----------------------------|
| Julia Montenegro | Phone: (780) 492-9010 | E-mail: premium@ualberta.ca |
|------------------|-----------------------|-----------------------------|

### **Background**

Meal replacements are nutritionally complete formula foods used to substitute a meal. They can be a drink, bar, or soup. These products have been gaining popularity because they can help individuals lose weight. In addition, depending on its ingredients, meal replacements may affect our health. For this reason, meal replacements have been studied for health benefits. However, how meal replacements affect the microbes living in our gut, inflammation, and our genes is not known. Therefore, our study will investigate how a meal replacement affects these factors, as well as metabolism, the amount of fat and muscle of our bodies, and appetite. The powdered meal replacement used in this study is not investigational and is available for purchase by the public. However, because we are using it in this study to see the effect on gut microbes, this meal replacement is considered investigational by Health Canada, which has approved this study.

### **What will happen in the study?**

Participants will attend at least 4 clinic visits over a 14-week period. The day and time of your visits will be decided by you and the study coordinator. We will first collect a blood sample to determine if you are eligible for the study. If eligible, you will be randomly assigned to a powdered meal replacement group or control group. Participants in the powdered meal replacement group will add the meal replacement to their diets twice daily for 12 weeks. Participants in the control group will maintain their usual food intake. The meal replacement is neutral tasting powder which you will add to water and drink. The study coordinator will show you how to do this. Besides from taking the meal replacement, no other lifestyle changes are needed and maintain your normal medication regime and physical activity level is required. You must inform study staff if you make any changes to your current medication or nutritional supplement use. You cannot participate in the study if you take any natural health products which may

alter inflammation, gut microbiome, energy metabolism, body weight and composition, or hormone levels. You should also continue to eat your normal diet. You will weigh yourself daily during the study using a scale we will give you. It is important that you do not lose or gain weight during the study. If this happens you will meet with a registered dietitian to adjust your food intake. Over 12 weeks we will collect three blood samples to measure the level of inflammation, different hormones, genes related to nutrient metabolism and gene expression, fat, and sugar in your blood. We will also collect three stool samples to study the microbes living in your gut and three urine samples to study the substances you consumed with the meal replacement (only if you are in the powdered meal replacement group). You will also complete different questionnaires that ask you about your food intake and level of physical activity. Moreover, for the powdered meal replacement group, you will answer questionnaires about how hungry or full you feel.

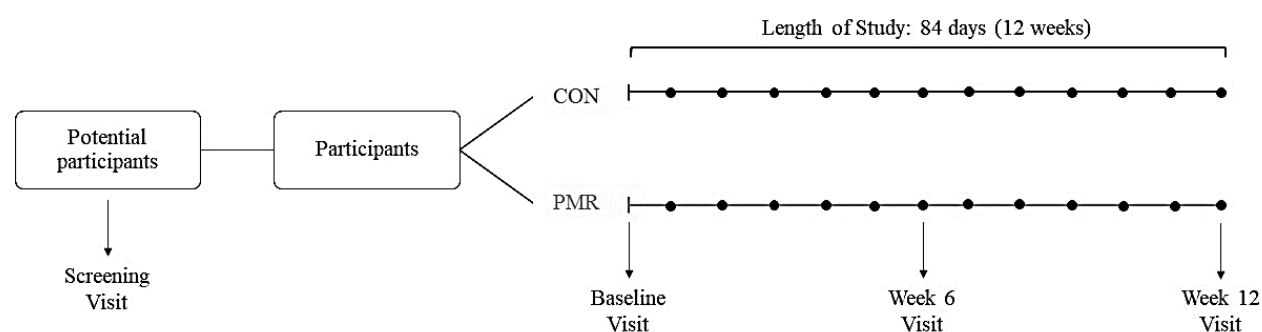

**Screening visit:** Sign “Informed Consent Form”, fasting blood draw, complete questionnaires (personal information, health status, and physical activity), anthropometric and body composition assessments.

**Visits at baseline and week 6:** Participants in PMR group collect nutritional supplement packages.

**Intervention visits (baseline, week 6, and week 12):** 1-hour WBCU test, fasting blood draw, urine (PMR group) and stool sample collection, body composition assessment, physical activity questionnaire.

• **Weekly:** Phone call to verify compliance, participants send 1-day dietary record, body weight and appetite sensation (PMR group). On the weeks 1, 6 and 12 there will be 3-day dietary record instead of 1-day dietary record.

Figure: Study design.

### Visit 1 – Screening (about 1 hour):

This visit will happen in the morning. For this visit you should not consume alcohol for 3 days and not eat or drink for 12 hours before the visit. You may drink water. First, the study coordinator will explain the study to you. If you are interested in participating, you will be asked to sign this consent form. Then trained personnel will collect 10 mL of your blood (2 teaspoons). This blood sample will help us determine if you are eligible to participate based on your liver, kidney and thyroid function, and hydration status. If one or more of these tests is outside the reference values for a healthy person, you will be notified and considered not eligible to participate in our study. You may not participate in this study if you are pregnant, the blood test will tell us if you are currently pregnant. During the study, those who are of childbearing potential, must practice adequate methods of birth control (e.g., total abstinence, hormonal birth control methods (oral, injectable, transdermal, or intra-vaginal), intrauterine devices, confirmed successful vasectomy of partner etc.). If you become pregnant over the duration of the study, you must stop taking



the product, and immediately inform the study investigators. You will also answer questions related to personal characteristics, health status and physical activity. We will measure your height, weight, and waist circumference. We will also measure the fat in your body using bioelectrical impedance analysis (BIA). You will lie down on a bed and eight self-adhesive electrodes will be connected to both of your hands and feet. You will not feel anything, and the procedure will take 1 to 2 minutes. Or you will be asked to stand on a scale with the ball and the heel of each foot in contact with four metal electrodes. This measurement will take no more than 15 seconds. At the end of this visit we will offer to you a snack and a beverage. Once we test your blood, we will contact you to let you know if you are eligible. If so, you will be randomly assigned to a powdered meal replacement group or control group and we will schedule your second visit.

### *Visit 2 (about 3 hours):*

This visit will also happen in the morning. For this visit, you should not consume alcohol for 3 days and not eat or drink for 12 hours before the visit. You may drink water. You should not exercise 24 hours before this visit and do as little activity as possible before the visit. For example, taking the elevator instead of the stairs.

At the beginning of this visit we will estimate how many calories you burn during a day using the whole-body calorimetry unit (WBCU). The WBCU is similar to a small hotel room. It has a bed, armchair, table, sink, toilet, television, computer/internet and treadmill. You will lie in a relaxed position on a bed. You will breathe regularly and relax without falling asleep. The test will take about 1 hour.

Then, we will measure the fat and muscle in your body using 3 safe and routine techniques. The first technique is a dual energy X-ray absorptiometry [DXA] scan, which may happen in a different day than the visit but in the same week or as close as possible. Before the scan we will make sure it is safe for you by asking some questions. If you are a woman, we will test your blood sample to see if you are pregnant. Pregnant women will not be allowed to participate in this study. During the scan you will lie down on a bed and the technician will position you correctly. The equipment “arm” will pass over your body and it will not cause any discomfort to you. It will take about 20 minutes to finish this test. The second technique is air displacement plethysmography (ADP). During this test you will sit comfortably inside a chamber and stay relaxed and quiet for 1 minute. This will happen twice. The entire test will take about 5 minutes. For this test, you will need to wear minimal, form-fitting clothing and a swim-cap. The last technique is the BIA, you will lie down on a bed and eight electrodes will be connected to both of your hands and feet. You will not feel anything, and the procedure will take 1 to 2 minutes.

After these assessments, certified personnel will collect 24 mL of your blood (5 teaspoons) to assess your level of inflammation, hormones, the interaction between your genes and the diet, fat, and sugar in your blood. If you are in the powdered meal replacement group, you will also collect your urine (~1 cup) to assess the level of substances contained in the meal replacement.

Then, we will give you a snack to eat. You will then answer a physical activity questionnaire. The study coordinator will explain how to monitor your body weight and complete questionnaires for the study. These questionnaires will ask about how hungry and full you feel and the foods you eat.

We will also explain how to collect a stool sample at home using the kit provided. You can bring this stool sample back later the same day or the next day. Once we receive your first stool sample, the research coordinator will give to participants assigned to the powdered meal replacement group the



packages with the product and explain how to use it. The product will be mixed with water and taken twice daily as snacks in the morning and afternoon for 12 weeks (84 days). Lastly, the study coordinator will provide you with another stool collection kit.

### *Visit 3 – Day 42 (about 3 hours):*

This visit will happen in the morning and is similar to Visit 2, except genetic analyses, that will not be assessed. This means that the amount of blood we will collect will be 20 mL (4 teaspoons). For this visit, you should not consume alcohol for 3 days and not eat or drink for 12 hours before the visit. You may drink water. You should not exercise 24 hours before this visit and do as little activity as possible before the visit. During this visit we will complete the same assessments as Visit 2. You will also bring your stool sample to this visit. If you are unable to bring it to this visit, you can bring on the day before or after your scheduled appointment.

The study coordinator will check if your weight has changed from the beginning of the study and review your study journal. If your weight has changed the dietitian will work with you to adjust your diet to make sure your weight remains stable. At the end of the visit, the study coordinator will provide you with another stool collection kit. Participants in the powdered meal replacement group should keep taking the meal replacement mixed with water twice daily as snacks in the morning and afternoon until Visit 4. Participants in the control group will maintain their usual food intake.

### *Visit 4 – Day 84 (about 3 hours):*

For this visit you will prepare as you did for Visit 2. This will be the last visit you will attend. For this visit you should bring back the scale provided during the study period and your final stool sample. As with the other stool sample collections, you are able to bring the sample to the visit, or the day before or after the scheduled visit. The study will have been completed at the end of this visit.

### *Weekly Assessment / Communication:*

At the beginning of the study, we will provide a study journal. This provides reminders of what needs to be done every day throughout the study. Daily and weekly tasks include weighing yourself and completing questionnaires. These questionnaires will be about how hungry and full you feel (only for participants assigned to the powdered meal replacement group) and the foods you eat. Before Visits 2, 3, and 4 you will complete an online questionnaire about the food you ate three days during the weeks of these study visits. This will include one weekend day and one weekday. For the other weeks of the study, you will complete one of these questionnaires each week. The study coordinator will call or email you each week. This is to make sure you are following the recommendations provided. You will also be asked about your daily weight measurements and reminded to complete your study journal.

### *Results:*

You will learn how many calories you burn in a day. You will also receive information about the amount of fat, bone, and lean soft tissue (i.e., everything else, but fat and bone) in your body.



### Information about Investigational Product:

Serving Size: 8 tablespoons (50g)

Servings Per Container: 10

| Amount Per Serving              | % Daily Value* |
|---------------------------------|----------------|
| <b>Calories</b> 180             |                |
| Calories from Fat 9             |                |
| <b>Total Fat</b> 1.0g*          | <b>1.5%</b>    |
| Saturated Fat 0.5g*             | <b>2.5%</b>    |
| Trans Fat 0g                    | **             |
| Polyunsaturated Fat 0.1g        | **             |
| Monounsaturated Fat 0.4g        | **             |
| <b>Cholesterol</b> 3mg          | <b>1%</b>      |
| <b>Sodium</b> 340mg             | <b>15%</b>     |
| <b>Potassium</b> 500mg          | <b>14%</b>     |
| <b>Total Carbohydrates</b> 15g* | <b>6%</b>      |
| Dietary Fiber 0.5g*             | <b>2%</b>      |
| Sugars 15g                      | **             |
| <b>Protein</b> 27g*             | <b>54%</b>     |

|                             |      |
|-----------------------------|------|
| Vitamin A 794 IU            | 16%  |
| Vitamin C 16mg              | 27%  |
| Vitamin E 6 IU              | 20%  |
| Thiamin (Vitamin B1) .5mg   | 33%  |
| Riboflavin (Vitamin B2) 6mg | 350% |
| Vitamin B6 .7mg             | 35%  |
| Calcium 215mg               | 22%  |
| Iron 4.9mg                  | 27%  |

\* Percent Daily Values are based on a 2,000 calorie diet.

\*\* Daily Value not established.

#### Essential and Potentially Essential

#### Amino Acid Content of Protein Ingredients

| Amino Acid   |        | Per Serving 50g |        |
|--------------|--------|-----------------|--------|
| L Tyrosine   | 950mg  | L Leucine       | 2300mg |
| L Methionine | 400mg  | L Isoleucine    | 1400mg |
| L Cystine    | 300mg  | L Valine        | 1400mg |
| L Lysine     | 1550mg | L Histidine     | 700mg  |
| L Threonine  | 950mg  | L Arginine      | 1800mg |
| L Tryptophan | 400mg  | L Phenylalanine | 1300mg |

**Ingredients:** Soy Protein Isolate, Honey, Skim Milk Yogurt Powder, Potassium Chloride, Magnesium Carbonate, Calcium Citrate, Vitamin C, Niacin, Color Additive: Riboflavin (Vitamin B2), Vitamin E, Zinc Oxide, Ferrous Fumarate, Manganese Sulfate, Calcium Pantothenate, Vitamin B2, Vitamin B6, Vitamin B1, Vitamin A, Folic Acid, Potassium Iodide, Sodium Selenite, Biotin, Vitamin D3, Vitamin B12

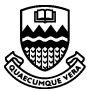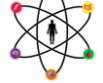

### What are the risks and discomforts?

There are no known risks of eating the meal replacement, there may be unknown risk with taking this investigational natural health product and potential side effects may include liver related drug adverse events. It is very unlikely to cause you any discomfort. The blood draws are a routine procedure performed by trained personnel. A needle will be inserted into a vein and blood will be withdrawn for lab tests. It is possible you may experience mild pain, fainting, bleeding, and bruising, and or an infection at the insertion site. Bruising is common, but usually goes away after a few days. Infection, dizziness, and fainting are rare during this procedure. There are no risks of having the genetic analysis, only potential general genetic linkages with metabolism of nutrients will be identified. You may also feel uncomfortable being alone in the WBCU. However, the tests will take only 1 hour and there will always be research staff close by and there is an intercom system to talk to them.

The X-ray dose associated with DXA scan is very low and not believed to have any long-term bad effects on your health. Pregnant women are excluded as a precaution. Having a DXA scan does not make it unsafe for you to have other X-rays in the future.

The BIA test is a risk for you only if you have a pacemaker or other internal electrical medical device. This is due to the risk of device malfunction from the weak electrical signal. Individuals with pacemakers or internal medical devices will not be able to participate in this study.

Dr. Laurie Mereu is a member of our research team and medical doctor. She will review your blood tests. If there are abnormal results Dr. Mereu will provide suggestions on how to proceed.

Risk of exposure to COVID-19 with your participation include exposure to others (research personnel and other participants) and increased time within our research unit. Measures undertaken to reduce this risk include ensuring all personnel and participants wear a mask, and frequent hand washing. All hard surfaces and common touched areas are disinfected before and after each visit. One-way traffic and physical distancing of 2 meters are encouraged at all times.

### What happens if I am injured because of this research?

If you become ill or injured as a result of being in this study, you will still be able to receive necessary medical treatment. This will occur at no additional cost to you. By signing this consent form, you are not releasing the investigators, institution, or sponsors from their legal and professional duties.

### What are the benefits to me?

There are no direct benefits to you for participating in this study. We hope the study will give us more information about how our bodies use the powdered meal replacement.

### Do I have to participate?

No. Taking part in this study is your choice. You may stop participating in the study at any time. You can withdraw by contacting a study coordinator. Phone number: (780) 492-9010.

### Will I be paid to be in the research?

After you complete the study, we will compensate your time with a \$300 honorarium. We will also give to you a parking pass in case you need to park your car in front of our clinic. There is no cost associated with participating.



### Will my information be kept private?

During the study we will collect your health information. This will be kept private. We will not release information containing your name outside of the study investigators office. It will not be listed in the research when published. By law, we may have to release your information with your name so we cannot guarantee absolute privacy. However, we will make every legal effort to make sure that your health information is kept private.

During research studies it is important that the data we get is accurate. For this reason, your health data and name may be looked at by people from the University of Alberta auditors or members of the Research Ethics Board. By signing this consent form, you are giving permission for the study staff to collect your health information and use it for research purposes.

After the study is done, we will securely store your health data that was collected as part of the study. As per Health Canada requirements, your data will be stored and kept confidential for 15 years. If you leave the study, we will ask permission to keep your data. If you do not respond, we will use your data that had been collected so far.

If you leave the study, we will not collect any new information from you. However, we will keep the data that we have already collected, unless you specifically request it to be destroyed.

### What if I have questions?

If you have any questions about this research, please contact the principal investigator (Dr. Carla Prado at 780-492-7934) or the study coordinator (Julia Montenegro at 780-492-9010).

If you suffer a research related injury, please contact the study coordinator at this number as well.

If you have any questions about your rights as a research participant, you may contact the Health Research Ethics Board at 780-492-2615. This office is independent of the study investigators.

The study is being sponsored by the ALMASED WELLNESS GMBH, the company that makes the powdered meal replacement. If you need, you can request any details about this product from the Principal Investigator.

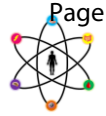

## CONSENT

**Title of Study:** The impact of a powdered meal replacement on metabolism and gut microbiota: a 12-week study in individuals with excessive body weight.

**Principal Investigators:**

|                 |                       |                                 |
|-----------------|-----------------------|---------------------------------|
| Dr. Carla Prado | Phone: (780) 492-7934 | E-mail: carla.prado@ualberta.ca |
| Dr. Jens Walter |                       | E-mail: jwalter1@ualberta.ca    |
| Dr. Arya Sharma |                       | E-mail: amsharm@ualberta.ca     |

**Qualified Investigator:**

|                  |                       |                                  |
|------------------|-----------------------|----------------------------------|
| Dr. Laurie Mereu | Phone: (780) 492-3626 | E-mail: laurie.mereu@ualberta.ca |
|------------------|-----------------------|----------------------------------|

**Study Manager:**

|                                       |                       |                             |
|---------------------------------------|-----------------------|-----------------------------|
| Camila Oliveira, Post-doctoral Fellow | Phone: (780) 492-9010 | E-mail: premium@ualberta.ca |
|---------------------------------------|-----------------------|-----------------------------|

**Study Coordinator:**

|                               |                       |                             |
|-------------------------------|-----------------------|-----------------------------|
| Julia Montenegro, PhD Student | Phone: (780) 492-9010 | E-mail: premium@ualberta.ca |
|-------------------------------|-----------------------|-----------------------------|

By signing below, you understand:

- That you have read the above information and have had anything that you do not understand explained to you to your satisfaction.
- That you will be taking part in a research study.
- That you read and received a copy of the attached Information Sheet.
- The benefits and risks involved in taking part in this research study.
- That you are free to leave the study at any time, without having to give a reason and without affecting your future medical care.
- Who will have access to your records, including personally identifiable health information.

Who explained this study to you? \_\_\_\_\_

Signature of Research Participant \_\_\_\_\_

(Printed Name) \_\_\_\_\_

Date: \_\_\_\_\_

I believe that the person signing this form understands what is involved in the study and voluntarily agrees to participate.

Signature of Investigator or Designee \_\_\_\_\_ Date \_\_\_\_\_

THE INFORMATION SHEET MUST BE ATTACHED TO THIS CONSENT FORM AND A SIGNED COPY GIVEN TO THE RESEARCH PARTICIPANT.



# Reporting checklist for protocol of a clinical trial.

Based on the SPIRIT guidelines.

## Instructions to authors

Complete this checklist by entering the page numbers from your manuscript where readers will find each of the items listed below.

Your article may not currently address all the items on the checklist. Please modify your text to include the missing information. If you are certain that an item does not apply, please write "n/a" and provide a short explanation.

Upload your completed checklist as an extra file when you submit to a journal.

In your methods section, say that you used the SPIRIT reporting guidelines, and cite them as:

Chan A-W, Tetzlaff JM, Gøtzsche PC, Altman DG, Mann H, Berlin J, Dickersin K, Hróbjartsson A, Schulz KF, Parulekar WR, Krleža-Jerić K, Laupacis A, Moher D. SPIRIT 2013 Explanation and Elaboration: Guidance for protocols of clinical trials. *BMJ*. 2013;346:e7586

|                                   | Reporting Item                                                                                                                  | Page Number |
|-----------------------------------|---------------------------------------------------------------------------------------------------------------------------------|-------------|
| <b>Administrative information</b> |                                                                                                                                 |             |
| Title                             | <a href="#">#1</a> Descriptive title identifying the study design, population, interventions, and, if applicable, trial acronym | 1           |
| Trial registration                | <a href="#">#2a</a> Trial identifier and registry name. If not yet                                                              | 2, 6, 22    |

|    |                     |                                                                             |          |
|----|---------------------|-----------------------------------------------------------------------------|----------|
| 1  |                     | registered, name of intended registry                                       |          |
| 2  |                     |                                                                             |          |
| 3  |                     |                                                                             |          |
| 4  | Trial registration: | <a href="#">#2b</a> All items from the World Health Organization Trial      | 6-7      |
| 5  |                     |                                                                             |          |
| 6  | data set            | Registration Data Set                                                       |          |
| 7  |                     |                                                                             |          |
| 8  |                     |                                                                             |          |
| 9  | Protocol version    | <a href="#">#3</a> Date and version identifier                              | 2, 6, 22 |
| 10 |                     |                                                                             |          |
| 11 |                     |                                                                             |          |
| 12 | Funding             | <a href="#">#4</a> Sources and types of financial, material, and other      | 23-24    |
| 13 |                     |                                                                             |          |
| 14 |                     | support                                                                     |          |
| 15 |                     |                                                                             |          |
| 16 |                     |                                                                             |          |
| 17 | Roles and           | <a href="#">#5a</a> Names, affiliations, and roles of protocol contributors | 1, 23    |
| 18 |                     |                                                                             |          |
| 19 | responsibilities:   |                                                                             |          |
| 20 |                     |                                                                             |          |
| 21 | contributorship     |                                                                             |          |
| 22 |                     |                                                                             |          |
| 23 |                     |                                                                             |          |
| 24 |                     |                                                                             |          |
| 25 | Roles and           | <a href="#">#5b</a> Name and contact information for the trial sponsor      | 23       |
| 26 |                     |                                                                             |          |
| 27 | responsibilities:   |                                                                             |          |
| 28 |                     |                                                                             |          |
| 29 | sponsor contact     |                                                                             |          |
| 30 |                     |                                                                             |          |
| 31 | information         |                                                                             |          |
| 32 |                     |                                                                             |          |
| 33 |                     |                                                                             |          |
| 34 |                     |                                                                             |          |
| 35 | Roles and           | <a href="#">#5c</a> Role of study sponsor and funders, if any, in study     | 22-23    |
| 36 |                     |                                                                             |          |
| 37 | responsibilities:   | design; collection, management, analysis, and                               |          |
| 38 |                     |                                                                             |          |
| 39 | sponsor and funder  | interpretation of data; writing of the report; and the                      |          |
| 40 |                     |                                                                             |          |
| 41 |                     | decision to submit the report for publication, including                    |          |
| 42 |                     |                                                                             |          |
| 43 |                     | whether they will have ultimate authority over any of                       |          |
| 44 |                     |                                                                             |          |
| 45 |                     | these activities                                                            |          |
| 46 |                     |                                                                             |          |
| 47 |                     |                                                                             |          |
| 48 |                     |                                                                             |          |
| 49 | Roles and           | <a href="#">#5d</a> Composition, roles, and responsibilities of the         | 23       |
| 50 |                     |                                                                             |          |
| 51 | responsibilities:   | coordinating centre, steering committee, endpoint                           |          |
| 52 |                     |                                                                             |          |
| 53 | committees          | adjudication committee, data management team, and                           |          |
| 54 |                     |                                                                             |          |
| 55 |                     | other individuals or groups overseeing the trial, if                        |          |
| 56 |                     |                                                                             |          |
| 57 |                     |                                                                             |          |
| 58 |                     |                                                                             |          |
| 59 |                     |                                                                             |          |
| 60 |                     |                                                                             |          |

1 applicable (see Item 21a for data monitoring

2  
3 committee)

4  
5  
6 **Introduction**

7  
8  
9 Background and [#6a](#) Description of research question and justification for 4-5  
10  
11 rationale undertaking the trial, including summary of relevant  
12  
13 studies (published and unpublished) examining

14  
15 benefits and harms for each intervention

16  
17  
18 Background and [#6b](#) Explanation for choice of comparators 5  
19  
20 rationale: choice of  
21  
22 comparators  
23  
24

25  
26 Objectives [#7](#) Specific objectives or hypotheses 5

27  
28  
29 Trial design [#8](#) Description of trial design including type of trial (eg, 5-6  
30  
31 parallel group, crossover, factorial, single group),  
32  
33 allocation ratio, and framework (eg, superiority,  
34  
35 equivalence, non-inferiority, exploratory)  
36  
37

38  
39 **Methods:**

40  
41 **Participants,**  
42  
43 **interventions, and**  
44  
45 **outcomes**  
46  
47

48  
49 Study setting [#9](#) Description of study settings (eg, community clinic, 5  
50  
51 academic hospital) and list of countries where data  
52  
53 will be collected. Reference to where list of study  
54  
55 sites can be obtained  
56  
57

|    |                      |                      |                                                        |        |
|----|----------------------|----------------------|--------------------------------------------------------|--------|
| 1  | Eligibility criteria | <a href="#">#10</a>  | Inclusion and exclusion criteria for participants. If  | 8-9    |
| 2  |                      |                      |                                                        |        |
| 3  |                      |                      | applicable, eligibility criteria for study centres and |        |
| 4  |                      |                      | individuals who will perform the interventions (eg,    |        |
| 5  |                      |                      | surgeons, psychotherapists)                            |        |
| 6  |                      |                      |                                                        |        |
| 7  |                      |                      |                                                        |        |
| 8  |                      |                      |                                                        |        |
| 9  |                      |                      |                                                        |        |
| 10 |                      |                      |                                                        |        |
| 11 | Interventions:       | <a href="#">#11a</a> | Interventions for each group with sufficient detail to | 10     |
| 12 |                      |                      |                                                        |        |
| 13 | description          |                      | allow replication, including how and when they will be |        |
| 14 |                      |                      | administered                                           |        |
| 15 |                      |                      |                                                        |        |
| 16 |                      |                      |                                                        |        |
| 17 |                      |                      |                                                        |        |
| 18 |                      |                      |                                                        |        |
| 19 | Interventions:       | <a href="#">#11b</a> | Criteria for discontinuing or modifying allocated      | 19     |
| 20 |                      |                      |                                                        |        |
| 21 | modifications        |                      | interventions for a given trial participant (eg, drug  |        |
| 22 |                      |                      | dose change in response to harms, participant          |        |
| 23 |                      |                      | request, or improving / worsening disease)             |        |
| 24 |                      |                      |                                                        |        |
| 25 |                      |                      |                                                        |        |
| 26 |                      |                      |                                                        |        |
| 27 |                      |                      |                                                        |        |
| 28 |                      |                      |                                                        |        |
| 29 | Interventions:       | <a href="#">#11c</a> | Strategies to improve adherence to intervention        | 12, 19 |
| 30 |                      |                      |                                                        |        |
| 31 | adherence            |                      | protocols, and any procedures for monitoring           |        |
| 32 |                      |                      | adherence (eg, drug tablet return; laboratory tests)   |        |
| 33 |                      |                      |                                                        |        |
| 34 |                      |                      |                                                        |        |
| 35 |                      |                      |                                                        |        |
| 36 | Interventions:       | <a href="#">#11d</a> | Relevant concomitant care and interventions that are   | 19     |
| 37 |                      |                      |                                                        |        |
| 38 | concomitant care     |                      | permitted or prohibited during the trial               |        |
| 39 |                      |                      |                                                        |        |
| 40 |                      |                      |                                                        |        |
| 41 |                      |                      |                                                        |        |
| 42 | Outcomes             | <a href="#">#12</a>  | Primary, secondary, and other outcomes, including      | 7-8    |
| 43 |                      |                      |                                                        |        |
| 44 |                      |                      | the specific measurement variable (eg, systolic blood  |        |
| 45 |                      |                      | pressure), analysis metric (eg, change from baseline,  |        |
| 46 |                      |                      | final value, time to event), method of aggregation     |        |
| 47 |                      |                      | (eg, median, proportion), and time point for each      |        |
| 48 |                      |                      | outcome. Explanation of the clinical relevance of      |        |
| 49 |                      |                      | chosen efficacy and harm outcomes is strongly          |        |
| 50 |                      |                      | recommended                                            |        |
| 51 |                      |                      |                                                        |        |
| 52 |                      |                      |                                                        |        |
| 53 |                      |                      |                                                        |        |
| 54 |                      |                      |                                                        |        |
| 55 |                      |                      |                                                        |        |
| 56 |                      |                      |                                                        |        |
| 57 |                      |                      |                                                        |        |
| 58 |                      |                      |                                                        |        |
| 59 |                      |                      |                                                        |        |
| 60 |                      |                      |                                                        |        |

|    |                           |                      |                                                          |       |
|----|---------------------------|----------------------|----------------------------------------------------------|-------|
| 1  | Participant timeline      | <a href="#">#13</a>  | Time schedule of enrolment, interventions (including     | 11-12 |
| 2  |                           |                      | any run-ins and washouts), assessments, and visits       |       |
| 3  |                           |                      | for participants. A schematic diagram is highly          |       |
| 4  |                           |                      | recommended (see Figure)                                 |       |
| 5  |                           |                      |                                                          |       |
| 6  |                           |                      |                                                          |       |
| 7  |                           |                      |                                                          |       |
| 8  |                           |                      |                                                          |       |
| 9  |                           |                      |                                                          |       |
| 10 |                           |                      |                                                          |       |
| 11 | Sample size               | <a href="#">#14</a>  | Estimated number of participants needed to achieve       | 19-20 |
| 12 |                           |                      | study objectives and how it was determined,              |       |
| 13 |                           |                      | including clinical and statistical assumptions           |       |
| 14 |                           |                      | supporting any sample size calculations                  |       |
| 15 |                           |                      |                                                          |       |
| 16 |                           |                      |                                                          |       |
| 17 |                           |                      |                                                          |       |
| 18 |                           |                      |                                                          |       |
| 19 |                           |                      |                                                          |       |
| 20 |                           |                      |                                                          |       |
| 21 | Recruitment               | <a href="#">#15</a>  | Strategies for achieving adequate participant            | 9     |
| 22 |                           |                      | enrolment to reach target sample size                    |       |
| 23 |                           |                      |                                                          |       |
| 24 |                           |                      |                                                          |       |
| 25 |                           |                      |                                                          |       |
| 26 | <b>Methods:</b>           |                      |                                                          |       |
| 27 |                           |                      |                                                          |       |
| 28 | <b>Assignment of</b>      |                      |                                                          |       |
| 29 | <b>interventions (for</b> |                      |                                                          |       |
| 30 | <b>controlled trials)</b> |                      |                                                          |       |
| 31 |                           |                      |                                                          |       |
| 32 |                           |                      |                                                          |       |
| 33 |                           |                      |                                                          |       |
| 34 |                           |                      |                                                          |       |
| 35 |                           |                      |                                                          |       |
| 36 | Allocation: sequence      | <a href="#">#16a</a> | Method of generating the allocation sequence (eg,        | 10    |
| 37 | generation                |                      | computer-generated random numbers), and list of          |       |
| 38 |                           |                      | any factors for stratification. To reduce predictability |       |
| 39 |                           |                      | of a random sequence, details of any planned             |       |
| 40 |                           |                      | restriction (eg, blocking) should be provided in a       |       |
| 41 |                           |                      | separate document that is unavailable to those who       |       |
| 42 |                           |                      | enrol participants or assign interventions               |       |
| 43 |                           |                      |                                                          |       |
| 44 |                           |                      |                                                          |       |
| 45 |                           |                      |                                                          |       |
| 46 |                           |                      |                                                          |       |
| 47 |                           |                      |                                                          |       |
| 48 |                           |                      |                                                          |       |
| 49 |                           |                      |                                                          |       |
| 50 |                           |                      |                                                          |       |
| 51 |                           |                      |                                                          |       |
| 52 |                           |                      |                                                          |       |
| 53 | Allocation                | <a href="#">#16b</a> | Mechanism of implementing the allocation sequence        | 10    |
| 54 | concealment               |                      | (eg, central telephone; sequentially numbered,           |       |
| 55 | mechanism                 |                      | opaque, sealed envelopes), describing any steps to       |       |
| 56 |                           |                      |                                                          |       |
| 57 |                           |                      |                                                          |       |
| 58 |                           |                      |                                                          |       |
| 59 |                           |                      |                                                          |       |
| 60 |                           |                      |                                                          |       |

|    |                        |                                                                            |        |
|----|------------------------|----------------------------------------------------------------------------|--------|
| 1  |                        | conceal the sequence until interventions are                               |        |
| 2  |                        |                                                                            |        |
| 3  |                        | assigned                                                                   |        |
| 4  |                        |                                                                            |        |
| 5  |                        |                                                                            |        |
| 6  | Allocation:            | <a href="#">#16c</a> Who will generate the allocation sequence, who will   | 10     |
| 7  |                        |                                                                            |        |
| 8  | implementation         | enrol participants, and who will assign participants to                    |        |
| 9  |                        |                                                                            |        |
| 10 |                        | interventions                                                              |        |
| 11 |                        |                                                                            |        |
| 12 |                        |                                                                            |        |
| 13 | Blinding (masking)     | <a href="#">#17a</a> Who will be blinded after assignment to interventions | 3, 10  |
| 14 |                        |                                                                            |        |
| 15 |                        | (eg, trial participants, care providers, outcome                           |        |
| 16 |                        |                                                                            |        |
| 17 |                        | assessors, data analysts), and how                                         |        |
| 18 |                        |                                                                            |        |
| 19 |                        |                                                                            |        |
| 20 |                        |                                                                            |        |
| 21 | Blinding (masking):    | <a href="#">#17b</a> If blinded, circumstances under which unblinding is   | n/a    |
| 22 |                        |                                                                            |        |
| 23 | emergency              | permissible, and procedure for revealing a                                 |        |
| 24 |                        |                                                                            |        |
| 25 | unblinding             | participant's allocated intervention during the trial                      |        |
| 26 |                        |                                                                            |        |
| 27 |                        |                                                                            |        |
| 28 |                        |                                                                            |        |
| 29 | <b>Methods: Data</b>   |                                                                            |        |
| 30 |                        |                                                                            |        |
| 31 | <b>collection,</b>     |                                                                            |        |
| 32 |                        |                                                                            |        |
| 33 | <b>management, and</b> |                                                                            |        |
| 34 |                        |                                                                            |        |
| 35 | <b>analysis</b>        |                                                                            |        |
| 36 |                        |                                                                            |        |
| 37 |                        |                                                                            |        |
| 38 |                        |                                                                            |        |
| 39 | Data collection plan   | <a href="#">#18a</a> Plans for assessment and collection of outcome,       | 11-19  |
| 40 |                        |                                                                            |        |
| 41 |                        | baseline, and other trial data, including any related                      |        |
| 42 |                        |                                                                            |        |
| 43 |                        | processes to promote data quality (eg, duplicate                           |        |
| 44 |                        |                                                                            |        |
| 45 |                        | measurements, training of assessors) and a                                 |        |
| 46 |                        |                                                                            |        |
| 47 |                        | description of study instruments (eg, questionnaires,                      |        |
| 48 |                        |                                                                            |        |
| 49 |                        | laboratory tests) along with their reliability and                         |        |
| 50 |                        |                                                                            |        |
| 51 |                        | validity, if known. Reference to where data collection                     |        |
| 52 |                        |                                                                            |        |
| 53 |                        | forms can be found, if not in the protocol                                 |        |
| 54 |                        |                                                                            |        |
| 55 |                        |                                                                            |        |
| 56 |                        |                                                                            |        |
| 57 |                        |                                                                            |        |
| 58 | Data collection plan:  | <a href="#">#18b</a> Plans to promote participant retention and complete   | 12, 22 |
| 59 |                        |                                                                            |        |
| 60 |                        |                                                                            |        |

|    |                            |                      |                                                           |       |
|----|----------------------------|----------------------|-----------------------------------------------------------|-------|
| 1  | retention                  |                      | follow-up, including list of any outcome data to be       |       |
| 2  |                            |                      | collected for participants who discontinue or deviate     |       |
| 3  |                            |                      | from intervention protocols                               |       |
| 4  |                            |                      |                                                           |       |
| 5  |                            |                      |                                                           |       |
| 6  |                            |                      |                                                           |       |
| 7  |                            |                      |                                                           |       |
| 8  | Data management            | <a href="#">#19</a>  | Plans for data entry, coding, security, and storage,      | 22-23 |
| 9  |                            |                      | including any related processes to promote data           |       |
| 10 |                            |                      | quality (eg, double data entry; range checks for data     |       |
| 11 |                            |                      | values). Reference to where details of data               |       |
| 12 |                            |                      | management procedures can be found, if not in the         |       |
| 13 |                            |                      | protocol                                                  |       |
| 14 |                            |                      |                                                           |       |
| 15 |                            |                      |                                                           |       |
| 16 |                            |                      |                                                           |       |
| 17 |                            |                      |                                                           |       |
| 18 |                            |                      |                                                           |       |
| 19 |                            |                      |                                                           |       |
| 20 |                            |                      |                                                           |       |
| 21 |                            |                      |                                                           |       |
| 22 | Statistics: outcomes       | <a href="#">#20a</a> | Statistical methods for analysing primary and             | 20-22 |
| 23 |                            |                      | secondary outcomes. Reference to where other              |       |
| 24 |                            |                      | details of the statistical analysis plan can be found, if |       |
| 25 |                            |                      | not in the protocol                                       |       |
| 26 |                            |                      |                                                           |       |
| 27 |                            |                      |                                                           |       |
| 28 |                            |                      |                                                           |       |
| 29 |                            |                      |                                                           |       |
| 30 |                            |                      |                                                           |       |
| 31 |                            |                      |                                                           |       |
| 32 | Statistics: additional     | <a href="#">#20b</a> | Methods for any additional analyses (eg, subgroup         | n/a   |
| 33 | analyses                   |                      | and adjusted analyses)                                    |       |
| 34 |                            |                      |                                                           |       |
| 35 |                            |                      |                                                           |       |
| 36 |                            |                      |                                                           |       |
| 37 |                            |                      |                                                           |       |
| 38 | Statistics: analysis       | <a href="#">#20c</a> | Definition of analysis population relating to protocol    | 20-22 |
| 39 | population and             |                      | non-adherence (eg, as randomised analysis), and           |       |
| 40 | missing data               |                      | any statistical methods to handle missing data (eg,       |       |
| 41 |                            |                      | multiple imputation)                                      |       |
| 42 |                            |                      |                                                           |       |
| 43 |                            |                      |                                                           |       |
| 44 |                            |                      |                                                           |       |
| 45 |                            |                      |                                                           |       |
| 46 |                            |                      |                                                           |       |
| 47 | <b>Methods: Monitoring</b> |                      |                                                           |       |
| 48 |                            |                      |                                                           |       |
| 49 |                            |                      |                                                           |       |
| 50 |                            |                      |                                                           |       |
| 51 | Data monitoring:           | <a href="#">#21a</a> | Composition of data monitoring committee (DMC);           | 22    |
| 52 | formal committee           |                      | summary of its role and reporting structure;              |       |
| 53 |                            |                      | statement of whether it is independent from the           |       |
| 54 |                            |                      | sponsor and competing interests; and reference to         |       |
| 55 |                            |                      |                                                           |       |
| 56 |                            |                      |                                                           |       |
| 57 |                            |                      |                                                           |       |
| 58 |                            |                      |                                                           |       |
| 59 |                            |                      |                                                           |       |
| 60 |                            |                      |                                                           |       |

1 where further details about its charter can be found,  
 2  
 3 if not in the protocol. Alternatively, an explanation of  
 4  
 5 why a DMC is not needed  
 6  
 7

|    |                      |                      |                                                      |       |
|----|----------------------|----------------------|------------------------------------------------------|-------|
| 8  | Data monitoring:     | <a href="#">#21b</a> | Description of any interim analyses and stopping     | 20-22 |
| 9  |                      |                      |                                                      |       |
| 10 | interim analysis     |                      | guidelines, including who will have access to these  |       |
| 11 |                      |                      |                                                      |       |
| 12 |                      |                      | interim results and make the final decision to       |       |
| 13 |                      |                      |                                                      |       |
| 14 |                      |                      | terminate the trial                                  |       |
| 15 |                      |                      |                                                      |       |
| 16 |                      |                      |                                                      |       |
| 17 |                      |                      |                                                      |       |
| 18 | Harms                | <a href="#">#22</a>  | Plans for collecting, assessing, reporting, and      | 12    |
| 19 |                      |                      |                                                      |       |
| 20 |                      |                      | managing solicited and spontaneously reported        |       |
| 21 |                      |                      |                                                      |       |
| 22 |                      |                      | adverse events and other unintended effects of trial |       |
| 23 |                      |                      |                                                      |       |
| 24 |                      |                      | interventions or trial conduct                       |       |
| 25 |                      |                      |                                                      |       |
| 26 |                      |                      |                                                      |       |
| 27 |                      |                      |                                                      |       |
| 28 | Auditing             | <a href="#">#23</a>  | Frequency and procedures for auditing trial conduct, | 22    |
| 29 |                      |                      |                                                      |       |
| 30 |                      |                      | if any, and whether the process will be independent  |       |
| 31 |                      |                      |                                                      |       |
| 32 |                      |                      | from investigators and the sponsor                   |       |
| 33 |                      |                      |                                                      |       |
| 34 |                      |                      |                                                      |       |
| 35 | <b>Ethics and</b>    |                      |                                                      |       |
| 36 |                      |                      |                                                      |       |
| 37 | <b>dissemination</b> |                      |                                                      |       |
| 38 |                      |                      |                                                      |       |
| 39 |                      |                      |                                                      |       |
| 40 |                      |                      |                                                      |       |
| 41 | Research ethics      | <a href="#">#24</a>  | Plans for seeking research ethics committee /        | 22    |
| 42 |                      |                      |                                                      |       |
| 43 | approval             |                      | institutional review board (REC / IRB) approval      |       |
| 44 |                      |                      |                                                      |       |
| 45 |                      |                      |                                                      |       |
| 46 | Protocol             | <a href="#">#25</a>  | Plans for communicating important protocol           | 22    |
| 47 |                      |                      |                                                      |       |
| 48 | amendments           |                      | modifications (eg, changes to eligibility criteria,  |       |
| 49 |                      |                      |                                                      |       |
| 50 |                      |                      | outcomes, analyses) to relevant parties (eg,         |       |
| 51 |                      |                      |                                                      |       |
| 52 |                      |                      | investigators, REC / IRBs, trial participants, trial |       |
| 53 |                      |                      |                                                      |       |
| 54 |                      |                      | registries, journals, regulators)                    |       |
| 55 |                      |                      |                                                      |       |
| 56 |                      |                      |                                                      |       |
| 57 |                      |                      |                                                      |       |
| 58 |                      |                      |                                                      |       |
| 59 |                      |                      |                                                      |       |
| 60 |                      |                      |                                                      |       |



|    |                       |                      |                                                          |       |
|----|-----------------------|----------------------|----------------------------------------------------------|-------|
| 1  | Consent or assent     | <a href="#">#26a</a> | Who will obtain informed consent or assent from          | 6, 22 |
| 2  |                       |                      |                                                          |       |
| 3  |                       |                      |                                                          |       |
| 4  |                       |                      | potential trial participants or authorised surrogates,   |       |
| 5  |                       |                      |                                                          |       |
| 6  |                       |                      | and how (see Item 32)                                    |       |
| 7  |                       |                      |                                                          |       |
| 8  |                       |                      |                                                          |       |
| 9  | Consent or assent:    | <a href="#">#26b</a> | Additional consent provisions for collection and use     | n/a   |
| 10 |                       |                      |                                                          |       |
| 11 | ancillary studies     |                      | of participant data and biological specimens in          |       |
| 12 |                       |                      |                                                          |       |
| 13 |                       |                      | ancillary studies, if applicable                         |       |
| 14 |                       |                      |                                                          |       |
| 15 |                       |                      |                                                          |       |
| 16 | Confidentiality       | <a href="#">#27</a>  | How personal information about potential and             | 22-23 |
| 17 |                       |                      |                                                          |       |
| 18 |                       |                      | enrolled participants will be collected, shared, and     |       |
| 19 |                       |                      |                                                          |       |
| 20 |                       |                      | maintained in order to protect confidentiality before,   |       |
| 21 |                       |                      |                                                          |       |
| 22 |                       |                      | during, and after the trial                              |       |
| 23 |                       |                      |                                                          |       |
| 24 |                       |                      |                                                          |       |
| 25 |                       |                      |                                                          |       |
| 26 | Declaration of        | <a href="#">#28</a>  | Financial and other competing interests for principal    | 24    |
| 27 |                       |                      |                                                          |       |
| 28 | interests             |                      | investigators for the overall trial and each study site  |       |
| 29 |                       |                      |                                                          |       |
| 30 |                       |                      |                                                          |       |
| 31 |                       |                      |                                                          |       |
| 32 | Data access           | <a href="#">#29</a>  | Statement of who will have access to the final trial     | 22-23 |
| 33 |                       |                      |                                                          |       |
| 34 |                       |                      | dataset, and disclosure of contractual agreements        |       |
| 35 |                       |                      |                                                          |       |
| 36 |                       |                      | that limit such access for investigators                 |       |
| 37 |                       |                      |                                                          |       |
| 38 |                       |                      |                                                          |       |
| 39 | Ancillary and post    | <a href="#">#30</a>  | Provisions, if any, for ancillary and post-trial care,   | n/a   |
| 40 |                       |                      |                                                          |       |
| 41 | trial care            |                      | and for compensation to those who suffer harm from       |       |
| 42 |                       |                      |                                                          |       |
| 43 |                       |                      | trial participation                                      |       |
| 44 |                       |                      |                                                          |       |
| 45 |                       |                      |                                                          |       |
| 46 |                       |                      |                                                          |       |
| 47 | Dissemination         | <a href="#">#31a</a> | Plans for investigators and sponsor to communicate       | 22-23 |
| 48 |                       |                      |                                                          |       |
| 49 | policy: trial results |                      | trial results to participants, healthcare professionals, |       |
| 50 |                       |                      |                                                          |       |
| 51 |                       |                      | the public, and other relevant groups (eg, via           |       |
| 52 |                       |                      |                                                          |       |
| 53 |                       |                      | publication, reporting in results databases, or other    |       |
| 54 |                       |                      |                                                          |       |
| 55 |                       |                      | data sharing arrangements), including any                |       |
| 56 |                       |                      |                                                          |       |
| 57 |                       |                      |                                                          |       |
| 58 |                       |                      |                                                          |       |
| 59 |                       |                      |                                                          |       |
| 60 |                       |                      |                                                          |       |

publication restrictions

1  
2  
3  
4 Dissemination [#31b](#) Authorship eligibility guidelines and any intended use 22-23  
5  
6 policy: authorship of professional writers  
7

8  
9 Dissemination [#31c](#) Plans, if any, for granting public access to the full n/a  
10  
11 policy: reproducible protocol, participant-level dataset, and statistical  
12  
13 research code  
14  
15

## 16 Appendices

17  
18  
19 Informed consent [#32](#) Model consent form and other related documentation Supplementary  
20  
21 materials given to participants and authorised surrogates material  
22  
23  
24

25 Biological [#33](#) Plans for collection, laboratory evaluation, and 14-17  
26  
27 specimens storage of biological specimens for genetic or  
28  
29 molecular analysis in the current trial and for future  
30  
31 use in ancillary studies, if applicable  
32  
33  
34

35 The SPIRIT Explanation and Elaboration paper is distributed under the terms of the Creative  
36  
37 Commons Attribution License CC-BY-NC. This checklist was completed on 09. November 2022 using  
38  
39 <https://www.goodreports.org/>, a tool made by the [EQUATOR Network](#) in collaboration with  
40  
41 [Penelope.ai](#)  
42  
43  
44  
45  
46  
47  
48  
49  
50  
51  
52  
53  
54  
55  
56  
57  
58  
59  
60
